# Supplementary material for: α-Perfluoroalkyl-β-alkynylation of alkenes via radical alkynyl migration
Source: Royal Society of Chemistry journal article supplement (doi:10.1039/c7sc02175e), 2017-01-01

# **$\alpha$ -Perfluoroalkyl- $\beta$ -alkynylation of Alkenes *via* Radical Alkynyl Migration**

Xinjun Tang,<sup>†</sup> Armido Studer<sup>\*†</sup>

<sup>†</sup> Organisch-Chemisches Institut, Westfälische Wilhelms-Universität, Corrensstraße 40, 48149 Münster, Germany

\*E-mail: [studer@uni-muenster.de](mailto:studer@uni-muenster.de)

## **Supporting information**

### **Table of Contents**

|                                                                                                                  |     |
|------------------------------------------------------------------------------------------------------------------|-----|
| 1. Instrumentation and chemicals.....                                                                            | S1  |
| 2. Preparation of propargylic alcohols <b>1</b> .....                                                            | S2  |
| 3. Reaction of propargylic alcohols <b>1</b> with perfluoroalkyl iodides <b>2</b> .....                          | S10 |
| 4. Follow-up chemistry.....                                                                                      | S23 |
| 5. References.....                                                                                               | S25 |
| 6. <sup>1</sup> H and <sup>13</sup> C NMR spectra of compounds <b>1</b> , <b>3</b> , <b>4</b> and <b>5</b> ..... | S26 |

#### **1. Instrumentation and chemicals**

All reactions involving air- or moisture-sensitive reagents or intermediates were carried out in heat-gun-dried glassware under an argon atmosphere. For reactions with visible light a *Philips Master HPI-T Plus* (400 W) bulb was used. THF was freshly distilled from potassium under argon. All other solvents and reagents were purified according to standard procedures or were used as received from Aldrich, Acros Organics, Alfa Aesar. Propargylic alcohols **1** were synthesized according to literature procedures.<sup>[1]</sup> <sup>1</sup>H NMR and <sup>13</sup>C NMR spectra were recorded on a Bruker DPX 300, a Bruker AV 300, a Bruker AV 400 at 300 K. The solvents residual proton resonance and the respective carbon resonance (CHCl<sub>3</sub>,  $\delta$  = 7.26 ppm for <sup>1</sup>H NMR,  $\delta$  = 77.0 ppm for <sup>13</sup>C NMR) was used for calibration. Merck silica gel 60 F 254 plates were used for TLC, detection with UV light and dipping into a solution of KMnO<sub>4</sub> (1.5 g in 400 mL H<sub>2</sub>O, 5 g of NaHCO<sub>3</sub>), followed by heating. Flash column chromatography (FC) was performed using Merck or Fluka silica gel 60 (40-63  $\mu$ m) with a pressure of 0.3 bar. IR spectra were recorded on a Digilab Varian 3100 FT-IR Excalibur Series. Melting points (M.P.) were determined on a *SMP 10 apparatus* (Stuart Scientific). Mass spectra were recorded on a Bruker MicroTof or an Orbitrap LTQ XL (Nanospray) of Thermo Scientific.

## 2. Preparation of propargylic alcohols 1

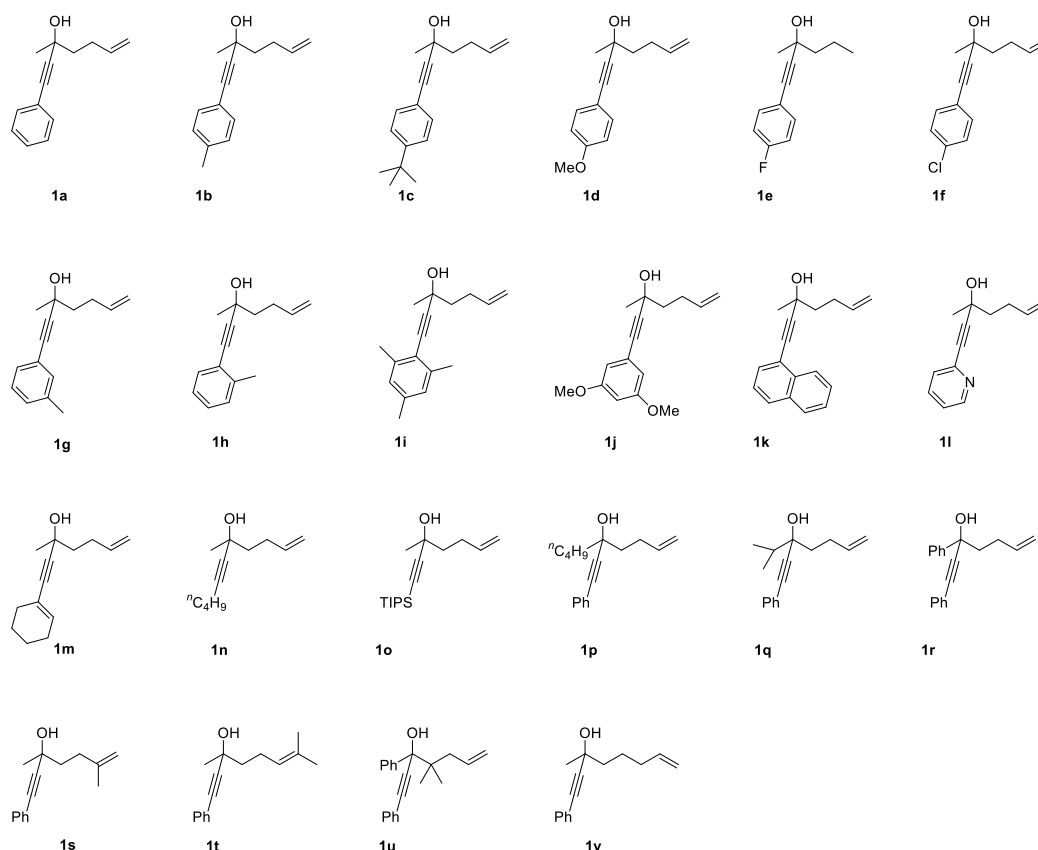

General procedure (GP1): Propargylic alcohols **1** were synthesized according to literature procedures.<sup>[1]</sup>

To a flame-dried flask equipped with a magnetic stir bar were added alkyne (5 mmol) and THF (35 mL). The mixture was then cooled to -78 °C. *n*BuLi (1.2 equiv) was added to it dropwise and the mixture maintained at this temperature for 15 min. Then the ketone (1 equiv) in 5 mL of THF was added dropwise at -78 °C. The reaction was allowed to warm to rt and stirring was continued overnight and then the reaction quenched with 50 mL of H<sub>2</sub>O. The aqueous phase was extracted with 50 mL of ethyl acetate three times. The organic phase was combined and washed with 50 mL of brine, dried over Na<sub>2</sub>SO<sub>4</sub>, and concentrated. The residual was then purified by flash column chromatography (SiO<sub>2</sub>) to obtain product **1**.

### 3-Methyl-1-phenylhept-6-en-1-yn-3-ol (**1a**)

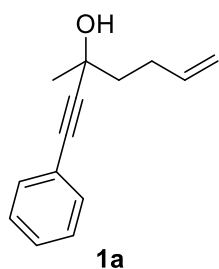

**1a**<sup>[1]</sup> was synthesized according to GP1: <sup>1</sup>H NMR (300 MHz, CDCl<sub>3</sub>) δ 7.49 – 7.41 (m, 2H), 7.37 – 7.31 (m, 3H), 6.04 – 5.84 (m, 1H), 5.24 – 4.97 (m, 2H), 2.52 – 2.31 (m, 2H), 2.15 (s, 1H), 1.94 – 1.83 (m, 2H), 1.62 (s, 3H). <sup>13</sup>C NMR

(100 MHz, CDCl<sub>3</sub>)  $\delta$  138.37, 131.62, 128.29, 128.24, 114.92, 92.44, 83.69, 68.56, 42.67, 30.04, 29.36.

**FTIR (neat):**  $\tilde{\nu}$  = 3376, 2978, 2933, 1641, 1598, 1490, 1443, 1370, 1109 cm<sup>-1</sup>.

### 3-Methyl-1-(p-tolyl)hept-6-en-1-yn-3-ol (1b)

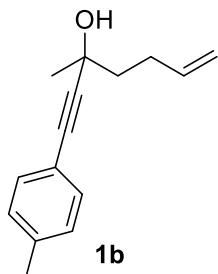

**1b** was synthesized according to GP1: **<sup>1</sup>H NMR** (400 MHz, CDCl<sub>3</sub>)  $\delta$  7.35 – 7.29 (m, 2H), 7.15 – 7.07 (m, 2H), 5.99 – 5.83 (m, 1H), 5.16 – 4.96 (m, 2H), 2.47 – 2.32 (m, 5H), 2.09 (brs, 1H), 1.92 – 1.79 (m, 2H), 1.59 (s, 3H). **<sup>13</sup>C NMR** (100 MHz, CDCl<sub>3</sub>)  $\delta$  138.42, 138.36, 131.50, 128.98, 114.84, 91.75, 68.55, 42.71, 30.06, 29.36, 21.43. **FTIR (neat):**  $\tilde{\nu}$  = 3363, 2978, 2928, 1641, 1510,

1449, 1370, 1106 cm<sup>-1</sup>. **HRMS (ESI):** Exact mass calculated for C<sub>17</sub>H<sub>14</sub>OSNa ([M+Na]<sup>+</sup>): 237.1250, mass found: 237.1260.

### 1-(4-(Tert-butyl)phenyl)-3-methylhept-6-en-1-yn-3-ol (1c)

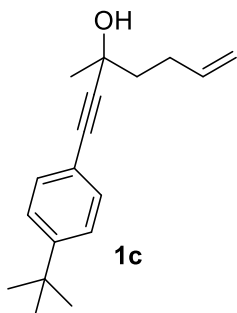

**1c** was synthesized according to GP1: **<sup>1</sup>H NMR** (300 MHz, CDCl<sub>3</sub>)  $\delta$  7.29 – 7.12 (m, 4H), 5.88 – 5.62 (m, 1H), 5.10 – 4.77 (m, 2H), 2.35 – 2.11 (m, 3H), 1.85 – 1.61 (m, 2H), 1.46 (s, 3H), 1.17 (s, 9H). **<sup>13</sup>C NMR** (75 MHz, CDCl<sub>3</sub>)  $\delta$  151.44, 138.40, 131.32, 125.17, 119.66, 114.75, 91.90, 83.72, 68.47, 42.76, 34.66, 31.10, 30.02, 29.32. **FTIR (neat):**  $\tilde{\nu}$  = 3358, 2964, 1641, 1507, 1462, 1364, 1267, 1105 cm<sup>-1</sup>. **HRMS (ESI):** Exact mass calculated for C<sub>14</sub>H<sub>15</sub>ClONa ([M+Na]<sup>+</sup>): 279.1719, mass found: 279.1722.

### 3-Methyl-1-(p-tolyl)hept-6-en-1-yn-3-ol (1d)

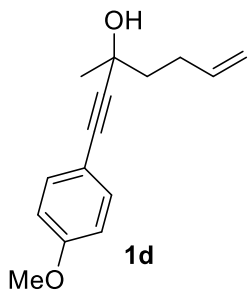

**1d** was synthesized according to GP1: **<sup>1</sup>H NMR** (300 MHz, CDCl<sub>3</sub>)  $\delta$  7.46 – 7.34 (m, 2H), 6.92 – 6.79 (m, 2H), 6.06 – 5.82 (m, 1H), 5.23 – 4.98 (m, 2H), 3.83 (s, 3H), 2.52 – 2.31 (m, 2H), 2.19 (s, 1H), 1.96 – 1.78 (m, 2H), 1.61 (s, 3H). **<sup>13</sup>C NMR** (75 MHz, CDCl<sub>3</sub>)  $\delta$  159.52, 138.43, 133.05, 114.83, 114.72, 113.84, 91.03, 83.54, 68.55, 55.25, 42.71, 30.09, 29.36. **FTIR (neat):**  $\tilde{\nu}$  =

3370, 2933, 1641, 1606, 1509, 1445, 1288, 1245, 1169, 1106, 1030 cm<sup>-1</sup>. **HRMS (ESI):** Exact mass calculated for C<sub>17</sub>H<sub>14</sub>OSNa ([M+Na]<sup>+</sup>): 253.1199, mass found: 253.1201.

### 1-(4-Fluorophenyl)-3-methylhept-6-en-1-yn-3-ol (**1e**)

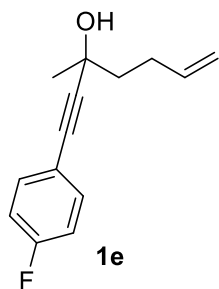

**1e** was synthesized according to GP1:  $^1\text{H NMR}$  (300 MHz,  $\text{CDCl}_3$ )  $\delta$  7.51 – 7.37 (m, 2H), 7.13 – 6.94 (m, 2H), 6.06 – 5.77 (m, 1H), 5.24 – 4.97 (m, 2H), 2.50 – 2.30 (m, 2H), 2.21 (s, 1H), 1.95 – 1.83 (m, 2H), 1.61 (s, 3H).  $^{13}\text{C NMR}$  (75 MHz,  $\text{CDCl}_3$ )  $\delta$  164.14, 138.30, 133.56, 133.45, 115.65, 115.36, 114.90, 82.64, 68.51, 42.69, 29.99, 29.30. **FTIR (neat)**:  $\tilde{\nu}$  = 3376, 3080, 2989, 2934, 1641, 1601, 1506, 1450, 1222, 1155, 1093  $\text{cm}^{-1}$ . **HRMS (ESI)**: Exact mass calculated for  $\text{C}_{14}\text{H}_{15}\text{OFNa}$  ( $[\text{M}+\text{Na}]^+$ ): 241.0999, mass found: 241.1009.

### 1-(4-Chlorophenyl)-3-methylhept-6-en-1-yn-3-ol (**1f**)

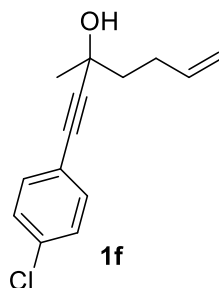

**1f** was synthesized according to GP1:  $^1\text{H NMR}$  (300 MHz,  $\text{CDCl}_3$ )  $\delta$  7.39 – 7.35 (m, 2H), 7.33 – 7.28 (m, 2H), 6.00 – 5.86 (m, 1H), 5.19 – 4.99 (m, 2H), 2.48 – 2.30 (m, 2H), 2.15 (s, 1H), 1.95 – 1.82 (m, 2H), 1.61 (s, 3H).  $^{13}\text{C NMR}$  (75 MHz,  $\text{CDCl}_3$ )  $\delta$  138.24, 134.32, 132.85, 128.59, 121.14, 115.00, 93.42, 82.60, 68.55, 42.58, 29.96, 29.31. **FTIR (neat)**:  $\tilde{\nu}$  = 3353, 2977, 2930, 1641, 1488, 1452, 1370, 1265, 1089, 1015  $\text{cm}^{-1}$ . **HRMS (ESI)**: Exact mass calculated for  $\text{C}_{14}\text{H}_{15}^{35}\text{ClONa}$  ( $[\text{M}+\text{Na}]^+$ ): 257.0704, mass found: 257.0744.

### 3-Methyl-1-(m-tolyl)hept-6-en-1-yn-3-ol (**1g**)

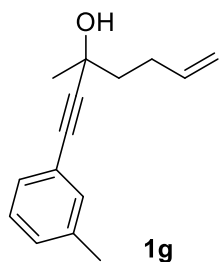

**1g** was synthesized according to GP1:  $^1\text{H NMR}$  (300 MHz,  $\text{CDCl}_3$ )  $\delta$  7.31 – 7.13 (m, 4H), 6.05 – 5.85 (m, 1H), 5.23 – 4.99 (m, 2H), 2.47 – 2.31 (m, 5H), 2.21 (s, 1H), 1.98 – 1.81 (m, 2H), 1.63 (s, 3H).  $^{13}\text{C NMR}$  (75 MHz,  $\text{CDCl}_3$ )  $\delta$  138.40, 137.91, 132.21, 129.14, 128.68, 128.13, 122.48, 114.84, 92.15, 83.85, 68.53, 42.74, 30.05, 29.34, 21.14. **FTIR (neat)**:  $\tilde{\nu}$  = 3374, 2970, 2927, 2856, 1641, 1601, 1582, 1481, 1449, 1369, 1111  $\text{cm}^{-1}$ . **HRMS (ESI)**: Exact mass calculated for  $\text{C}_{15}\text{H}_{18}\text{ONa}$  ( $[\text{M}+\text{Na}]^+$ ): 237.1250, mass found: 237.1254.

### 3-Methyl-1-(o-tolyl)hept-6-en-1-yn-3-ol (**1h**)

**1h** was synthesized according to GP1:  $^1\text{H NMR}$  (300 MHz,  $\text{CDCl}_3$ )  $\delta$  7.43 (d,  $J$  = 7.2 Hz, 1H), 7.30 – 7.12 (m, 3H), 6.05 – 5.86 (m, 1H), 5.22 – 4.99 (m, 2H), 2.54 – 2.36 (m, 5H), 2.29 (s, 1H), 2.00 – 1.83



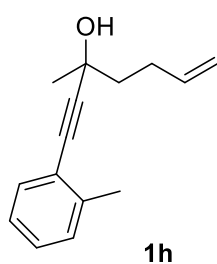

(m, 2H), 1.66 (s, 3H).  $^{13}\text{C}$  NMR (75 MHz,  $\text{CDCl}_3$ )  $\delta$  140.04, 138.37, 131.90, 129.36, 128.28, 125.47, 122.42, 114.84, 96.59, 82.52, 68.69, 42.80, 30.17, 29.41, 20.65. **FTIR (neat):**  $\tilde{\nu}$  = 3349, 2977, 2926, 1641, 1485, 1452, 1370, 1117  $\text{cm}^{-1}$ . **HRMS (ESI):** Exact mass calculated for  $\text{C}_{15}\text{H}_{18}\text{ONa}$  ( $[\text{M}+\text{Na}]^+$ ): 237.1250, mass found: 237.1258.

### 1-Mesityl-3-methylhept-6-en-1-yn-3-ol (1i)

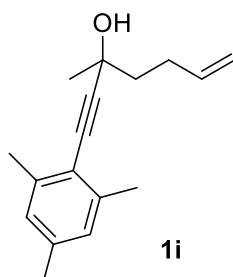

**1i** was synthesized according to GP1:  $^1\text{H}$  NMR (300 MHz,  $\text{CDCl}_3$ )  $\delta$  6.89 (s, 2H), 6.05 – 5.87 (m, 1H), 5.20 – 4.98 (m, 2H), 2.51 – 2.37 (m, 8H), 2.31 (s, 3H), 2.21 (s, 1H), 2.00 – 1.84 (m, 2H), 1.67 (s, 3H).  $^{13}\text{C}$  NMR (75 MHz,  $\text{CDCl}_3$ )  $\delta$  140.06, 138.47, 137.71, 127.54, 119.36, 114.80, 100.38, 81.37, 68.92, 42.92, 30.41, 29.53, 21.24, 20.93. **FTIR (neat):**  $\tilde{\nu}$  = 3388, 2976, 2917, 2856, 1641, 1611, 1480, 1450, 1375, 1106, 1034  $\text{cm}^{-1}$ . **HRMS (ESI):** Exact mass calculated for  $\text{C}_{17}\text{H}_{22}\text{ONa}$  ( $[\text{M}+\text{Na}]^+$ ): 265.1563, mass found: 265.1572.

### 1-(3,5-Dimethoxyphenyl)-3-methylhept-6-en-1-yn-3-ol (1j)

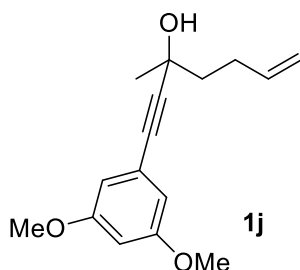

**1j** was synthesized according to GP1:  $^1\text{H}$  NMR (300 MHz,  $\text{CDCl}_3$ )  $\delta$  6.57 (d,  $J$  = 2.3 Hz, 2H), 6.43 (t,  $J$  = 2.3 Hz, 1H), 6.01 – 5.81 (m, 1H), 5.18 – 4.94 (m, 2H), 3.77 (s, 6H), 2.47 – 2.30 (m, 2H), 2.24 (brs, 1H), 1.90 – 1.79 (m, 2H), 1.59 (s, 3H).  $^{13}\text{C}$  NMR (75 MHz,  $\text{CDCl}_3$ )  $\delta$  160.42, 138.32, 123.92, 114.92, 109.39, 101.69, 92.01, 83.63, 68.51, 55.39, 42.61, 29.98, 29.31. **FTIR (neat):**  $\tilde{\nu}$  = 3381, 2976, 2936, 2841, 1641, 1587, 1453, 1420, 1350, 1204, 1153, 1060  $\text{cm}^{-1}$ . **HRMS (ESI):** Exact mass calculated for  $\text{C}_{16}\text{H}_{20}\text{O}_3\text{Na}$  ( $[\text{M}+\text{Na}]^+$ ): 283.1305, mass found: 283.1317.

### 3-Methyl-1-(naphthalen-1-yl)hept-6-en-1-yn-3-ol (1k)

**1k** was synthesized according to GP1:  $^1\text{H}$  NMR (300 MHz,  $\text{CDCl}_3$ )  $\delta$  8.34 – 8.26 (m, 1H), 7.90 – 7.79 (m, 2H), 7.67 (dd,  $J$  = 7.2, 1.2 Hz, 1H), 7.63 – 7.49 (m, 2H), 7.42 (dd,  $J$  = 8.3, 7.1 Hz, 1H), 6.05 – 5.88 (m, 1H), 5.21 – 4.99 (m, 2H), 2.58 – 2.40 (m, 2H), 2.28 (brs, 1H), 2.03 – 1.93 (m, 2H), 1.72 (s, 3H).  $^{13}\text{C}$  NMR (75 MHz,  $\text{CDCl}_3$ )  $\delta$  138.34, 133.19, 133.09, 130.46, 128.78, 128.27, 126.77, 126.36,

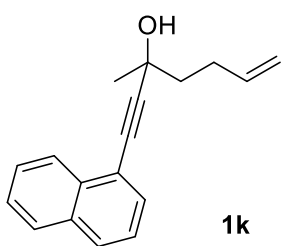

**1k**

125.94 , 125.12 , 120.22 , 115.01 , 97.46 , 81.73 , 68.86 , 42.78 , 30.22 , 29.50 . **FTIR (neat):**  $\tilde{\nu}$  = 3352, 3059, 2977, 2930, 2856, 1641, 1587, 1508, 1395, 1371, 1116  $\text{cm}^{-1}$ . **HRMS (ESI):** Exact mass calculated for  $\text{C}_{18}\text{H}_{18}\text{ONa}$  ( $[\text{M}+\text{Na}]^+$ ): 273.1250, mass found: 273.1256.

### 3-Methyl-1-(pyridin-2-yl)hept-6-en-1-yn-3-ol (1l)

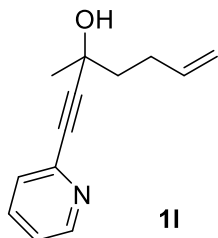

**1l**

**1l** was synthesized according to GP1:  **$^1\text{H}$  NMR** (300 MHz,  $\text{CDCl}_3$ )  $\delta$  8.60 (d,  $J$  = 4.5 Hz, 2H), 7.67 (td,  $J$  = 7.7, 1.8 Hz, 1H), 7.44 (dt,  $J$  = 7.8, 1.1 Hz, 1H), 7.25 (ddd,  $J$  = 7.6, 4.9, 1.2 Hz, 1H), 6.03 – 5.81 (m, 1H), 5.21 – 4.92 (m, 2H), 2.76 (s, 1H), 2.53 – 2.28 (m, 1H), 1.98 – 1.85 (m, 2H), 1.65 (s, 3H).  **$^{13}\text{C}$  NMR** (75 MHz,  $\text{CDCl}_3$ )  $\delta$  149.87 , 142.92 , 138.24 , 136.15 , 127.09 , 122.88 , 114.88 , 92.78 , 82.95 , 68.29 , 42.43 , 29.79 , 29.17 . **FTIR (neat):**  $\tilde{\nu}$  = 3309, 2976, 2934, 1641, 1583, 1564, 1464, 1428, 1369, 1272, 1150  $\text{cm}^{-1}$ . **HRMS (ESI):** Exact mass calculated for  $\text{C}_{13}\text{H}_{15}\text{NONa}$  ( $[\text{M}+\text{Na}]^+$ ): 224.1046, mass found: 224.1056.

### 1-Cyclohexyl-3-methylhept-6-en-1-yn-3-ol (1m)

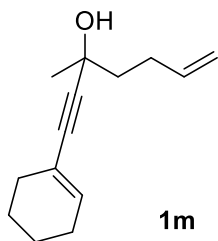

**1m**

**1m** was synthesized according to GP1:  **$^1\text{H}$  NMR** (300 MHz,  $\text{CDCl}_3$ )  $\delta$  6.15 – 6.08 (m, 1H), 6.00 – 5.82 (m, 1H), 5.17 – 4.94 (m, 2H), 2.44 – 2.22 (m, 2H), 2.19 – 2.04 (m, 5H), 1.87 – 1.74 (m, 2H), 1.71 – 1.56 (m, 4H), 1.53 (s, 3H).  **$^{13}\text{C}$  NMR** (75 MHz,  $\text{CDCl}_3$ )  $\delta$  138.49 , 134.90 , 120.13 , 114.68 , 89.82 , 85.46 , 68.42 , 42.79 , 30.13 , 29.33 , 29.25 , 25.57 , 22.26 , 21.46 . **FTIR (neat):**  $\tilde{\nu}$  = 3397, 2929, 1641, 1437, 1369, 1136, 1110  $\text{cm}^{-1}$ . **HRMS (ESI):** Exact mass calculated for  $\text{C}_{14}\text{H}_{20}\text{ONa}$  ( $[\text{M}+\text{Na}]^+$ ): 227.1406, mass found: 227.1414.

### 5-Methylundec-1-en-6-yn-5-ol (1n)

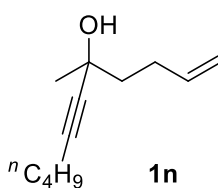

**1n**

**1n** was synthesized according to GP1:  **$^1\text{H}$  NMR** (300 MHz,  $\text{CDCl}_3$ )  $\delta$  6.02 – 5.76 (m, 1H), 5.19 – 4.91 (m, 2H), 2.42 – 2.16 (m, 4H), 2.06 (s, 1H), 1.85 – 1.65 (m, 2H), 1.60 – 1.35 (m, 7H), 0.93 (t,  $J$  = 7.1 Hz, 3H).  **$^{13}\text{C}$  NMR** (75 MHz,  $\text{CDCl}_3$ )  $\delta$  138.57 , 114.56 , 84.09 , 83.70 , 68.16 , 42.90 , 30.77 , 30.26 , 29.33 , 21.87 , 18.24 , 13.53 . **FTIR (neat):**  $\tilde{\nu}$  = 3350, 2959, 2932, 1642, 1455, 1369, 1125  $\text{cm}^{-1}$ . **HRMS (ESI):**

Exact mass calculated for  $C_{12}H_{20}ONa$  ( $[M+Na]^+$ ): 203.1406, mass found: 203.1413.

### 3-Methyl-1-(triisopropylsilyl)hept-6-en-1-yn-3-ol (**1o**)

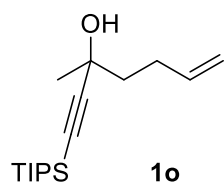

**1o** was synthesized according to GP1:  $^1H$  NMR (300 MHz,  $CDCl_3$ )  $\delta$  5.99 – 5.76 (m, 1H), 5.17 – 4.91 (m, 2H), 2.45 – 2.21 (m, 2H), 2.02 (s, 1H), 1.85 – 1.66 (m, 2H), 1.50 (s, 3H), 1.12 – 1.01 (m, 21H).  $^{13}C$  NMR (75 MHz,  $CDCl_3$ )  $\delta$  138.50, 114.79, 111.41, 83.80, 68.51, 42.77, 30.17, 29.47, 18.58, 11.15. **FTIR (neat)**:  $\tilde{\nu}$  = 3381, 2943, 2865, 1642, 1463, 1367, 1119, 1073  $cm^{-1}$ . **HRMS (ESI)**: Exact mass calculated for  $C_{17}H_{32}OSiNa$  ( $[M+Na]^+$ ): 303.2115, mass found: 303.2124.

### 5-(Phenylethynyl)non-1-en-5-ol (**1p**)

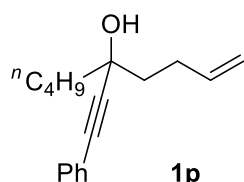

**1p** was synthesized according to GP1:  $^1H$  NMR (300 MHz,  $CDCl_3$ )  $\delta$  7.51 – 7.43 (m, 2H), 7.40 – 7.30 (m, 3H), 6.06 – 5.84 (m, 1H), 5.21 – 4.99 (m, 2H), 2.52 – 2.33 (m, 2H), 2.14 (s, 1H), 1.93 – 1.73 (m, 4H), 1.68 – 1.52 (m, 2H), 1.51 – 1.35 (m, 2H), 0.99 (t,  $J$  = 7.3 Hz, 3H).  $^{13}C$  NMR (75 MHz,  $CDCl_3$ )  $\delta$  138.57, 131.65, 128.24, 122.82, 114.79, 91.82, 84.72, 71.60, 42.10, 41.14, 28.97, 26.51, 22.88, 14.05. **FTIR (neat)**:  $\tilde{\nu}$  = 3374, 2956, 2934, 2862, 1641, 1599, 1490, 1443, 1379, 1340, 1256, 1135  $cm^{-1}$ . **HRMS (ESI)**: Exact mass calculated for  $C_{17}H_{22}ONa$  ( $[M+Na]^+$ ): 265.1563, mass found: 265.1566.

### 3-Isopropyl-1-phenylhept-6-en-1-yn-3-ol (**1q**)

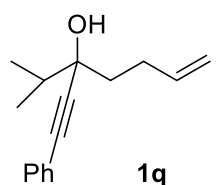

**1q** was synthesized according to GP1:  $^1H$  NMR (300 MHz,  $CDCl_3$ )  $\delta$  7.48 – 7.40 (m, 2H), 7.35 – 7.28 (m, 3H), 6.01 – 5.85 (m, 1H), 5.20 – 4.96 (m, 2H), 2.52 – 2.35 (m, 2H), 2.11 (s, 1H), 2.01 – 1.70 (m, 3H), 1.12 (d,  $J$  = 5.1 Hz, 3H), 1.09 (d,  $J$  = 5.1 Hz, 3H).  $^{13}C$  NMR (75 MHz,  $CDCl_3$ )  $\delta$  138.77, 131.64, 128.22, 128.19, 122.86, 114.73, 90.86, 85.38, 74.96, 38.37, 37.88, 28.87, 17.97, 17.09. **FTIR (neat)**:  $\tilde{\nu}$  = 3424, 2864, 1641, 1598, 1490, 1444, 1369, 1140, 1029  $cm^{-1}$ . **HRMS (ESI)**: Exact mass calculated for  $C_{16}H_{20}ONa$  ( $[M+Na]^+$ ): 251.1406, mass found: 251.1410.

### 1,3-Diphenylhept-6-en-1-yn-3-ol (**1r**)

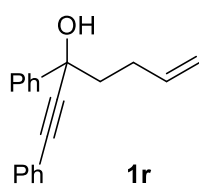

**1r**

**1r** was synthesized according to GP1: yellow solid, **MP**: 69 °C; **<sup>1</sup>H NMR** (300 MHz, CDCl<sub>3</sub>) δ 7.77 – 7.67 (m, 2H), 7.56 – 7.45 (m, 2H), 7.47 – 7.27 (m, 6H), 5.94 – 5.76 (m, 1H), 5.11 – 4.92 (m, 2H), 2.50 (s, 1H), 2.45 – 2.31 (m, 1H), 2.31 – 2.00 (m, 3H). **<sup>13</sup>C NMR** (75 MHz, CDCl<sub>3</sub>) δ 144.62 , 138.09 , 131.74 , 128.54 , 128.32 , 128.25 , 127.77 , 125.47 , 122.54 , 114.77 , 91.24 , 86.38 , 73.60 , 44.52 , 29.30 . **FTIR (neat)**:  $\tilde{\nu}$  = 3273, 3070, 2945, 1641, 1489, 1449, 1388, 1306, 1014 cm<sup>-1</sup>. **HRMS (ESI)**: Exact mass calculated for C<sub>19</sub>H<sub>18</sub>ONa ([M+Na]<sup>+</sup>): 285.1250, mass found: 285.1256.

Chiral **1r** was synthesized according to GP1 and literature<sup>2</sup>: **<sup>1</sup>H NMR** (300 MHz, CDCl<sub>3</sub>) δ 7.76 – 7.68 (m, 2H), 7.55 – 7.46 (m, 2H), 7.44 – 7.29 (m, 6H), 5.96 – 5.76 (m, 1H), 5.12 – 4.93 (m, 2H), 2.54 (s, 1H), 2.45 – 2.32 (m, 1H), 2.31 – 2.01 (m, 3H). The pure product was analyzed by chiral HPLC. Chiral HPLC (Chiralcel OD-H column with guard, 25 °C, 1 mL/min, cyclohexane:isopropanol = 90:10); Elution time:  $t_{\text{major}}$  = 14.6 min and  $t_{\text{minor}}$  = 23.0 min, enantiomeric excess (25%).

### 3,6-Dimethyl-1-phenylhept-6-en-1-yn-3-ol (**1s**)

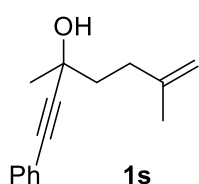

**1s**

**1s** was synthesized according to GP1: **<sup>1</sup>H NMR** (300 MHz, CDCl<sub>3</sub>) δ 7.47 – 7.38 (m, 2H), 7.35 – 7.27 (m, 3H), 4.83 – 4.73 (m, 2H), 2.45 – 2.22 (m, 3H), 2.02 – 1.84 (m, 2H), 1.79 (s, 3H), 1.61 (s, 3H). **<sup>13</sup>C NMR** (75 MHz, CDCl<sub>3</sub>) δ 145.72 , 131.61 , 128.21 , 122.71 , 110.17 , 92.53 , 83.65 , 68.63 , 41.61 , 33.13 , 29.97 , 22.58 . **FTIR (neat)**:  $\tilde{\nu}$  = 3355, 2978, 2931, 1649, 1599, 1490, 1444, 1374, 1341, 1261, 1201, 1118, 1099 cm<sup>-1</sup>. **HRMS (ESI)**: Exact mass calculated for C<sub>15</sub>H<sub>18</sub>ONa ([M+Na]<sup>+</sup>): 237.1250, mass found: 237.1271.

### 3,7-Dimethyl-1-phenyloct-6-en-1-yn-3-ol (**1t**)

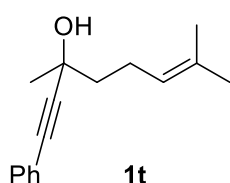

**1t**

**1t** was synthesized according to GP1: **<sup>1</sup>H NMR** (300 MHz, CDCl<sub>3</sub>) δ 7.48 – 7.39 (m, 2H), 7.35 – 7.27 (m, 3H), 5.27 – 5.16 (m, 1H), 2.46 – 2.14 (m, 3H), 1.84 – 1.76 (m, 2H), 1.73 – 1.70 (m, 3H), 1.68 (s, 3H), 1.59 (s, 3H). **<sup>13</sup>C NMR** (75 MHz, CDCl<sub>3</sub>) δ 132.44 , 131.62 , 128.21 , 128.17 , 123.87 , 122.84 , 92.78 , 83.53 , 68.82 , 43.49 , 29.92 , 25.69 , 23.83 , 17.71 . **FTIR (neat)**:  $\tilde{\nu}$  = 3363, 2971, 2919, 2854, 1598, 1490, 1444, 1375, 1267, 1186, 1117 cm<sup>-1</sup>. **HRMS (ESI)**: Exact mass calculated for C<sub>16</sub>H<sub>20</sub>ONa ([M+Na]<sup>+</sup>): 251.1406, mass found: 251.1405.

#### 4,4-Dimethyl-1,3-diphenylhept-6-en-1-yn-3-ol (**1u**)

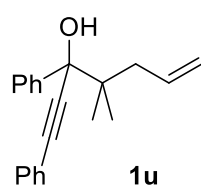

**1u** was synthesized according to GP1:  $^1\text{H NMR}$  (300 MHz,  $\text{CDCl}_3$ )  $\delta$  7.74 – 7.66 (m, 2H), 7.55 – 7.47 (m, 2H), 7.40 – 7.30 (m, 6H), 5.98 – 5.81 (m, 1H), 5.13 – 5.00 (m, 2H), 2.50 (s, 1H), 2.40 – 2.27 (m, 2H), 1.05 (s, 6H).  $^{13}\text{C NMR}$  (75 MHz,  $\text{CDCl}_3$ )  $\delta$  141.88, 135.95, 131.65, 128.42, 128.31, 127.90, 127.46, 127.13,

122.77, 117.38, 92.18, 86.36, 79.72, 42.63, 41.92, 28.25, 22.48, 21.60. **FTIR (neat)**:  $\tilde{\nu}$  = 3472, 3065, 2971, 2938, 1727, 1683, 1599, 1491, 1444, 1385, 1364, 1312, 1255, 1171, 1162, 1046  $\text{cm}^{-1}$ .

**HRMS (ESI)**: Exact mass calculated for  $\text{C}_{21}\text{H}_{22}\text{ONa}$  ( $[\text{M}+\text{Na}]^+$ ): 313.1563, mass found: 313.1568.

#### 3-Methyl-1-phenyloct-7-en-1-yn-3-ol (**1v**)

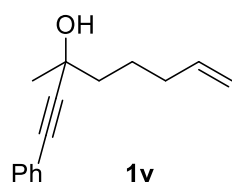

**1v** was synthesized according to GP1:  $^1\text{H NMR}$  (300 MHz,  $\text{CDCl}_3$ )  $\delta$  7.50 – 7.40 (m, 2H), 7.39 – 7.30 (m, 3H), 5.97 – 5.77 (m, 1H), 5.15 – 4.96 (m, 2H), 2.24 – 2.11 (m, 2H), 2.06 (s, 1H), 1.87 – 1.67 (m, 4H), 1.61 (s, 3H).  $^{13}\text{C NMR}$  (75 MHz,  $\text{CDCl}_3$ )  $\delta$  138.51, 131.64, 128.23, 122.77, 114.76, 92.83, 83.40,

68.55, 43.19, 33.70, 29.94, 24.07. **FTIR (neat)**:  $\tilde{\nu}$  = 3383, 3079, 2977, 2935, 2865, 2203, 1676, 1641, 1599, 1490, 1444, 1370, 1157  $\text{cm}^{-1}$ . **HRMS (ESI)**: Exact mass calculated for  $\text{C}_{15}\text{H}_{18}\text{ONa}$  ( $[\text{M}+\text{Na}]^+$ ): 237.1250, mass found: 237.1256.

### 3. Reaction of propargylic alcohols **1** with perfluoroalkyl iodides **2**

General procedure 2 (GP2): To a flame-dried Schlenk tube equipped with a magnetic stir bar LiOH (0.42 equiv), LiHMDS (1.2 equiv), **1** (0.1 mmol), and 1.25 mL of DME were added sequentially under Ar atmosphere. The mixture was allowed to stir at room temperature for 0.5 h. After that DABCO (1.5 equiv), and **2** (1.8 equiv) were added to the reaction mixture under Ar atmosphere. Then the reaction mixture was stirred under visible-light irradiation (temperature up to 50 °C) for 18 h. After that, the solvent was removed and the residue was purified by flash column chromatography ( $\text{SiO}_2$ ) to obtain product **3**.

#### 7,7,8,8,9,9,10,10,10-Nonafluoro-5-(phenylethynyl)decan-2-one (**3a**)

**3a** was synthesized according to GP2 with **1a** (20 mg, 0.100 mmol), LiHMDS (0.12 mL, 0.120 mmol, 1.0 M in THF solution), LiOH (1 mg, 0.042 mmol), DABCO (17 mg, 0.152 mmol), and **2a** (31  $\mu\text{L}$ ,

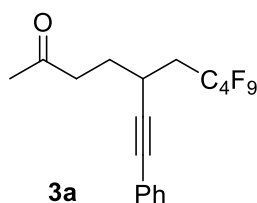

0.180 mmol) in 1.25 mL of DME under visible-light at 50 °C for 18 h.

Purification by flash column chromatography (pentane/ethyl ether = 10/1) provided **3a** as a liquid (33 mg, 79%); <sup>1</sup>H NMR (300 MHz, CDCl<sub>3</sub>) δ 7.39

(dd, *J* = 6.6, 3.2 Hz, 2H), 7.34 – 7.27 (m, 3H), 3.10 (ddd, *J* = 10.2, 5.0, 3.1 Hz, 1H), 2.83 – 2.65 (m, 2H), 2.58 – 2.22 (m, 2H), 2.19 (s, 3H), 2.11 – 1.96

(m, 1H), 1.89 – 1.74 (m, 1H). <sup>13</sup>C NMR (75 MHz, CDCl<sub>3</sub>) δ 207.44, 131.59, 128.28, 128.18, 89.26, 40.89, 36.21 (t, *J* = 20.9 Hz), 30.09, 29.10, 24.71 (t, *J* = 3.0 Hz). <sup>19</sup>F NMR (282 MHz, CDCl<sub>3</sub>) δ -81.02 (tt, *J* = 9.7, 3.4 Hz, 3F), -113.32 – -113.51 (m, 2F), -124.38 – -124.58 (m, 2F), -125.73 – -125.95 (m, 2F). FTIR (neat):  $\tilde{\nu}$  = 2947, 1718, 1599, 1491, 1443, 1356, 1217, 1131, 1110 cm<sup>-1</sup>. HRMS (ESI): Exact mass calculated for C<sub>18</sub>H<sub>15</sub>OF<sub>9</sub>Na ([M+Na]<sup>+</sup>): 441.0871, mass found: 441.0887.

#### 7,7,8,8,9,9,10,10,10-Nonafluoro-5-(p-tolylethynyl)decan-2-one (3b)

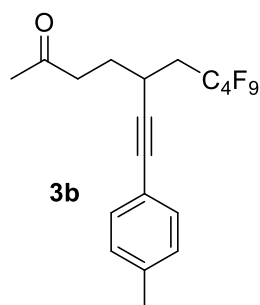

**3b** was synthesized according to GP2 with **1b** (21 mg, 0.098 mmol), LiHMDS (0.12 mL, 0.120 mmol, 1.0 M in THF solution), LiOH (1 mg, 0.042 mmol), DABCO (17 mg, 0.152 mmol), and **2a** (31 μL, 0.180 mmol) in 1.25 mL of DME under visible-light at 50 °C for 18 h. Purification by flash column chromatography (pentane/ethyl ether = 10/1) provided **3b** as a liquid (32 mg, 76%); <sup>1</sup>H NMR (300 MHz, CDCl<sub>3</sub>) δ 7.29 (d, *J* = 8.1 Hz, 2H), 7.14

– 7.08 (m, 2H), 3.08 (ddd, *J* = 10.2, 5.0, 3.0 Hz, 1H), 2.84 – 2.63 (m, 2H), 2.34 (brs, 5H), 2.19 (s, 3H), 2.11 – 1.95 (m, 1H), 1.88 – 1.71 (m, 1H). <sup>13</sup>C NMR (75 MHz, CDCl<sub>3</sub>) δ 207.52, 138.27, 131.45, 129.02, 88.50, 40.90, 36.50 (d, *J* = 21.2 Hz), 36.22, 35.95, 30.07, 29.13, 24.76 (d, *J* = 3.0 Hz), 24.71, 24.67, 21.39. <sup>19</sup>F NMR (282 MHz, CDCl<sub>3</sub>) δ -81.04 (tt, *J* = 9.7, 3.4 Hz, 3F), -113.34 – -113.55 (m, 2F), -124.37 – -124.64 (m, 2F), -125.73 – -125.99 (m, 2F). FTIR (neat):  $\tilde{\nu}$  = 2946, 1719, 1511, 1356, 1217, 1131, 1021 cm<sup>-1</sup>. HRMS (ESI): Exact mass calculated for C<sub>19</sub>H<sub>17</sub>OF<sub>9</sub>Na ([M+Na]<sup>+</sup>): 455.1028, mass found: 455.1044.

#### 5-((4-(*Tert*-butyl)phenyl)ethynyl)-7,7,8,8,9,9,10,10,10-nonafluorodecan-2-one (3c)

**3c** was synthesized according to GP2 with **1c** (26 mg, 0.101 mmol), LiHMDS (0.12 mL, 0.120 mmol, 1.0 M in THF solution), LiOH (1 mg, 0.042 mmol), DABCO (17 mg, 0.152 mmol), and **2a** (31 μL, 0.180 mmol) in 1.25 mL of DME under visible-light at 50 °C for 18 h. Purification by flash column

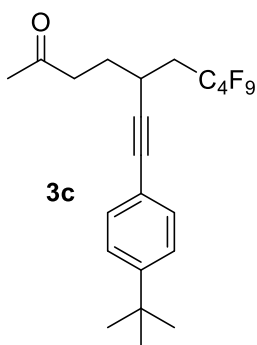

chromatography (pentane/ethyl ether = 10/1) provided **3c** as a liquid (27 mg, 56%); **<sup>1</sup>H NMR** (300 MHz, CDCl<sub>3</sub>) δ 7.33 (s, 4H), 3.15 – 3.01 (m, 1H), 2.84 – 2.64 (m, 2H), 2.55 – 2.22 (m, 2H), 2.19 (s, 3H), 2.09 – 1.96 (m, 1H), 1.87 – 1.73 (m, 1H), 1.31 (s, 9H). **<sup>13</sup>C NMR** (75 MHz, CDCl<sub>3</sub>) δ 207.51, 151.48, 131.31, 125.27, 119.93, 88.54, 83.36, 40.90, 36.25 (t, *J* = 21.0 Hz), 34.73, 31.15, 30.08, 29.14, 24.71 (t, *J* = 3.0 Hz). **<sup>19</sup>F NMR** (282 MHz, CDCl<sub>3</sub>) δ -81.03 (tt, *J* = 9.7, 3.4 Hz, 3F), -113.33 – -113.54 (m, 2F), -124.39 – -124.62 (m, 2F), -125.76 – -125.98 (m, 2F). **FTIR (neat)**:  $\tilde{\nu}$  = 2965, 1719, 1355, 1217, 1163, 1131, 1107, 1017 cm<sup>-1</sup>. **HRMS (ESI)**: Exact mass calculated for C<sub>22</sub>H<sub>23</sub>OF<sub>9</sub>Na ([M+Na]<sup>+</sup>): 497.1497, mass found: 497.1504.

#### 7,7,8,8,9,9,10,10,10-Nonafluoro-5-((4-methoxyphenyl)ethynyl)decan-2-one (3d)

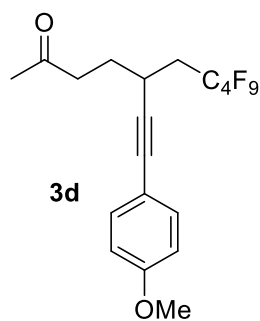

**3d** was synthesized according to GP2 with **1f** (23 mg, 0.100 mmol), LiHMDS (0.12 mL, 0.120 mmol, 1.0 M in THF solution), LiOH (1 mg, 0.042 mmol), DABCO (17 mg, 0.152 mmol), and **2a** (31 μL, 0.180 mmol) in 1.25 mL of DME under visible-light at 50 °C for 18 h. Purification by flash column chromatography (pentane/ethyl ether = 10/1) provided **3f** as a liquid (30 mg, 67%); **<sup>1</sup>H NMR** (300 MHz, CDCl<sub>3</sub>) δ 7.32 (d, *J* = 8.7 Hz, 2H), 6.83 (d, *J* = 8.7 Hz, 2H), 3.80 (s, 3H), 3.14 – 3.00 (m, 1H), 2.74 (dt, *J* = 8.4, 3.5 Hz, 2H), 2.55 – 2.21 (m, 2H), 2.19 (s, 3H), 2.01 (ddd, *J* = 8.6, 6.8, 3.9 Hz, 1H), 1.80 (ddd, *J* = 10.2, 5.9, 3.8 Hz, 1H). **<sup>13</sup>C NMR** (75 MHz, CDCl<sub>3</sub>) δ 207.55, 159.54, 132.96, 115.07, 113.92, 87.75, 83.10, 55.27, 40.93, 36.24 (t, *J* = 20.9 Hz), 30.08, 29.16, 24.72 (t, *J* = 2.9 Hz). **<sup>19</sup>F NMR** (282 MHz, CDCl<sub>3</sub>) δ -81.04 (tt, *J* = 9.7, 3.3 Hz, 3F), -113.37 – -113.56 (m, 2F), -124.42 – -124.60 (m, 2F), -125.76 – -125.98 (m, 2F). **FTIR (neat)**:  $\tilde{\nu}$  = 2938, 1718, 1608, 1511, 1444, 1365, 1290, 1232, 1219, 1172, 1132, 1107, 1031 cm<sup>-1</sup>. **HRMS (ESI)**: Exact mass calculated for C<sub>19</sub>H<sub>17</sub>O<sub>2</sub>F<sub>9</sub>Na ([M+Na]<sup>+</sup>): 471.0977, mass found: 471.0991.

#### 7,7,8,8,9,9,10,10,10-Nonafluoro-5-((4-fluorophenyl)ethynyl)decan-2-one (3e)

**3e** was synthesized according to GP2 with **1e** (23 mg, 0.100 mmol), LiHMDS (0.12 mL, 0.120 mmol, 1.0 M in THF solution), LiOH (1 mg, 0.042 mmol), DABCO (17 mg, 0.152 mmol), and **2a** (31 μL, 0.180 mmol) in 1.25 mL of DME under visible-light at 50 °C for 18 h. Purification by flash column

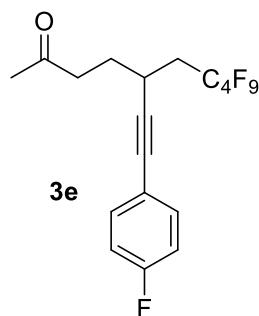

chromatography (pentane/ethyl ether = 10/1) provided **3e** as a liquid (30 mg, 68%); **<sup>1</sup>H NMR** (300 MHz, CDCl<sub>3</sub>) δ 7.33 – 7.24 (m, 2H), 6.97 – 6.87 (m, 2H), 3.00 (ddt, *J* = 9.9, 8.2, 4.9 Hz, 1H), 2.77 – 2.55 (m, 2H), 2.50 – 2.15 (m, 2H), 2.12 (s, 3H), 2.02 – 1.88 (m, 1H), 1.81 – 1.65 (m, 1H). **<sup>13</sup>C NMR** (75 MHz, CDCl<sub>3</sub>) δ 207.36, 162.43 (d, *J* = 249.2 Hz), 133.43 (d, *J* = 8.3 Hz), 118.99 (d, *J* = 3.5 Hz), 115.52 (d, *J* = 22.2 Hz), 88.92 (d, *J* = 1.5 Hz), 82.25, 40.84, 36.14 (t, *J* = 21.0 Hz), 30.06, 29.04, 24.65 (t, *J* = 3.0 Hz). **<sup>19</sup>F NMR** (282 MHz, CDCl<sub>3</sub>) δ -81.04 (tt, *J* = 9.7, 3.3 Hz, 3F), -111.14 – -111.24 (m, 1F), -113.36 – -113.59 (m, 2F), -124.41 – -124.62 (m, 2F), -125.76 – -125.99 (m, 2F). **FTIR (neat):**  $\tilde{\nu}$  = 2949, 1718, 1603, 1508, 1356, 1218, 1157, 1132, 1015 cm<sup>-1</sup>. **HRMS (ESI):** Exact mass calculated for C<sub>18</sub>H<sub>14</sub>OF<sub>10</sub>Na ([M+Na]<sup>+</sup>): 459.0777, mass found: 459.0788.

#### 5-((4-Chlorophenyl)ethynyl)-7,7,8,8,9,9,10,10,10-nonafluorodecan-2-one (**3f**)

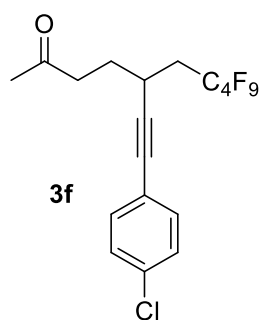

**3f** was synthesized according to GP2 with **1c** (23 mg, 0.098 mmol), LiHMDS (0.12 mL, 0.120 mmol, 1.0 M in THF solution), LiOH (1 mg, 0.042 mmol), DABCO (17 mg, 0.152 mmol), and **2a** (31 μL, 0.180 mmol) in 1.25 mL of DME under visible-light at 50 °C for 18 h. Purification by flash column chromatography (pentane/ethyl ether = 10/1) provided **3f** as a liquid (37 mg, 83%); **<sup>1</sup>H NMR** (300 MHz, CDCl<sub>3</sub>) δ 7.26 – 7.18 (m, 4H), 3.01 (ddt, *J* = 9.9, 8.2, 4.9 Hz, 1H), 2.75 – 2.54 (m, 2H), 2.48 – 2.15 (m, 2H), 2.12 (s, 3H), 1.94 (dq, *J* = 10.9, 3.9, 3.4 Hz, 1H), 1.80 – 1.68 (m, 1H). **<sup>13</sup>C NMR** (75 MHz, CDCl<sub>3</sub>) δ 207.30, 134.22, 132.80, 128.60, 121.40, 90.28, 82.23, 40.81, 36.08 (t, *J* = 21.0 Hz), 30.07, 28.98, 24.69 (t, *J* = 3.3 Hz). **<sup>19</sup>F NMR** (282 MHz, CDCl<sub>3</sub>) δ -81.03 (tt, *J* = 9.7, 3.3 Hz, 3F), -113.28 – -113.65 (m, 2F), -124.39 – -124.59 (m, 2F), -125.77 – -125.96 (m, 2F). **FTIR (neat):**  $\tilde{\nu}$  = 2947, 1718, 1491, 1357, 1234, 1222, 1165, 1134, 10921016 cm<sup>-1</sup>. **HRMS (ESI):** Exact mass calculated for C<sub>18</sub>H<sub>14</sub>O<sup>35</sup>ClF<sub>9</sub>Na ([M+Na]<sup>+</sup>): 475.0482, mass found: 475.0484.

#### 7,7,8,8,9,9,10,10,10-Nonafluoro-5-(*m*-tolylethynyl)decan-2-one (**3g**)

**3g** was synthesized according to GP2 with **1g** (21 mg, 0.098 mmol), LiHMDS (0.12 mL, 0.120 mmol, 1.0 M in THF solution), LiOH (1 mg, 0.042 mmol), DABCO (17 mg, 0.152 mmol), and **2a** (31 μL,



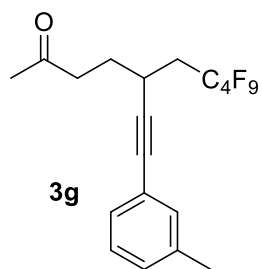

0.180 mmol) in 1.25 mL of DME under visible-light at 50 °C for 18 h. Purification by flash column chromatography (pentane/ethyl ether = 10/1) provided **3g** as a liquid (29 mg, 68%); **<sup>1</sup>H NMR** (300 MHz, CDCl<sub>3</sub>) δ 7.24 – 7.15 (m, 3H), 7.15 – 7.09 (m, 1H), 3.09 (ddt, *J* = 9.9, 8.0, 4.9 Hz, 1H), 2.83 – 2.64 (m, 2H), 2.55–2.23 (m, 5H), 2.19 (s, 3H), 2.07 – 1.96 (m, 1H), 1.80 (dd, *J* = 10.2, 6.0 Hz, 1H). **<sup>13</sup>C NMR** (75 MHz, CDCl<sub>3</sub>) δ 207.48 , 137.97 , 132.13 , 129.05 , 128.64 , 128.16 , 122.72 , 88.83 , 83.43 , 40.87 , 36.19 (t, *J* = 21.0 Hz), 30.07 , 29.10 , 24.67 (t, *J* = 3.2 Hz), 21.14 . **<sup>19</sup>F NMR** (282 MHz, CDCl<sub>3</sub>) δ -81.02 (tt, *J* = 9.7, 3.3 Hz, 3F), -113.37 – -113.57 (m, 2F), -124.39 – -124.62 (m, 2F), -125.75 – -126.01 (m, 2F). **FTIR (neat):**  $\tilde{\nu}$  = 2946, 2361, 1719, 1487, 1356, 1234, 1134 cm<sup>-1</sup>. **HRMS (ESI):** Exact mass calculated for C<sub>19</sub>H<sub>17</sub>OF<sub>9</sub>Na ([M+Na]<sup>+</sup>): 455.1028, mass found: 455.1044.

#### 7,7,8,8,9,9,10,10,10-Nonafluoro-5-(*o*-tolylethynyl)decan-2-one (**3h**)

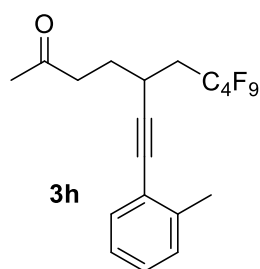

**3h** was synthesized according to GP2 with **1h** (21 mg, 0.098 mmol), LiHMDS (0.12 mL, 0.120 mmol, 1.0 M in THF solution), LiOH (1 mg, 0.042 mmol), DABCO (17 mg, 0.152 mmol), and **2a** (31 μL, 0.180 mmol) in 1.25 mL of DME under visible-light at 50 °C for 18 h. Purification by flash column chromatography (pentane/ethyl ether = 10/1) provided **3h** as a liquid (33 mg, 78%); **<sup>1</sup>H NMR** (300 MHz, CDCl<sub>3</sub>) δ 7.36 (dd, *J* = 7.3, 1.2 Hz, 1H), 7.23 – 7.16 (m, 2H), 7.16 – 7.08 (m, 1H), 3.14 (ddt, *J* = 9.8, 8.4, 4.8 Hz, 1H), 2.77 (td, *J* = 7.6, 6.9, 1.9 Hz, 2H), 2.54–2.23 (m, 5H), 2.19 (s, 3H), 2.11 – 1.98 (m, 1H), 1.87 – 1.76 (m, 1H). **<sup>13</sup>C NMR** (75 MHz, CDCl<sub>3</sub>) δ 207.44 , 140.02 , 131.94 , 129.42 , 128.18 , 125.51 , 122.70 , 93.19 , 82.20 , 40.88 , 36.37 (t, *J* = 21.1 Hz), 30.08 , 29.26 , 24.82 (t, *J* = 3.1 Hz), 20.57 . **<sup>19</sup>F NMR** (282 MHz, CDCl<sub>3</sub>) δ -81.03 (tt, *J* = 9.7, 3.3 Hz, 3F), -113.12 – -113.51 (m, 2F), -124.43 – -124.65 (m, 2F), -125.75 – -126.00 (m, 2F). **FTIR (neat):**  $\tilde{\nu}$  = 2954, 1719, 1487, 1356, 1220, 1165, 1133, 1037 cm<sup>-1</sup>. **HRMS (ESI):** Exact mass calculated for C<sub>19</sub>H<sub>17</sub>OF<sub>9</sub>Na ([M+Na]<sup>+</sup>): 455.1028, mass found: 455.1045.

#### 7,7,8,8,9,9,10,10,10-Nonafluoro-5-(mesitylethynyl)decan-2-one (**3i**)

**3i** was synthesized according to GP2 with **1i** (24 mg, 0.099 mmol), LiHMDS (0.12 mL, 0.120 mmol, 1.0 M in THF solution), LiOH (1 mg, 0.042 mmol), DABCO (17 mg, 0.152 mmol), and **2a** (31 μL,

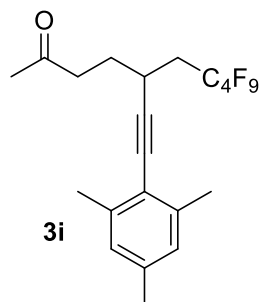

0.180 mmol) in 1.25 mL of DME under visible-light at 50 °C for 18 h.

Purification by flash column chromatography (pentane/ethyl ether = 10/1)

provided **3i** as a liquid (28 mg, 61%); <sup>1</sup>H NMR (300 MHz, CDCl<sub>3</sub>) δ 6.86 (s,

2H), 3.18 (dq, *J* = 13.2, 4.6 Hz, 1H), 2.88 – 2.70 (m, 2H), 2.55-2.23 (m,

11H), 2.18 (s, 3H), 2.12 – 1.98 (m, 1H), 1.88 – 1.74 (m, 1H). <sup>13</sup>C NMR (75

MHz, CDCl<sub>3</sub>) δ 207.45 , 140.05 , 137.57 , 127.58 , 119.64 , 96.95 , 80.97 ,

40.93 , 36.60 (t, *J* = 21.1 Hz), 30.04 , 29.49 , 24.99 (t, *J* = 3.2 Hz), 21.22 , 20.87 . <sup>19</sup>F NMR (282 MHz,

CDCl<sub>3</sub>) δ -81.03 (tt, *J* = 9.7, 3.4 Hz, 3F), -112.86 – -113.59 (m, 2F), -124.44 – -124.68 (m, 2F), -125.78

– -125.98 (m, 2F). **FTIR (neat):**  $\tilde{\nu}$  = 2921, 2362, 2336, 1718, 1375, 1365, 1217, 1131, 1109, 1034,

1014 cm<sup>-1</sup>. **HRMS (ESI):** Exact mass calculated for C<sub>19</sub>H<sub>17</sub>OF<sub>9</sub>Na ([M+Na]<sup>+</sup>): 483.1341, mass found:

483.1353.

#### 5-((3,5-Dimethoxyphenyl)ethynyl)-7,7,8,8,9,9,10,10,10-nonafluorodecan-2-one (**3j**)

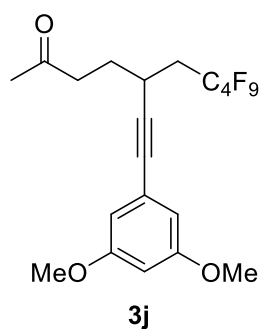

**3j** was synthesized according to GP2 with **1j** (26 mg, 0.100 mmol),

LiHMDS (0.12 mL, 0.120 mmol, 1.0 M in THF solution), LiOH (1 mg,

0.042 mmol), DABCO (17 mg, 0.152 mmol), and **2a** (31 μL, 0.180 mmol) in

1.25 mL of DME under visible-light at 50 °C for 18 h. Purification by flash

column chromatography (pentane/ethyl ether = 6/1) provided **3j** as a liquid

(27 mg, 57%); <sup>1</sup>H NMR (300 MHz, CDCl<sub>3</sub>) δ 6.54 (d, *J* = 2.4 Hz, 2H), 6.43

(t, *J* = 2.3 Hz, 1H), 3.78 (s, 6H), 3.08 (dt, *J* = 7.9, 5.0 Hz, 1H), 2.80 – 2.64 (m, 2H), 2.57 – 2.22 (m,

2H), 2.19 (s, 3H), 2.11 – 1.95 (m, 1H), 1.87 – 1.75 (m, 1H). <sup>13</sup>C NMR (75 MHz, CDCl<sub>3</sub>) δ 207.47 ,

160.55 , 124.22 , 109.50 , 101.53 , 88.86 , 83.26 , 55.39 , 40.87 , 36.13 (t, *J* = 21.2 Hz), 30.11 , 29.03 ,

24.67 (t, *J* = 2.9 Hz). <sup>19</sup>F NMR (282 MHz, CDCl<sub>3</sub>) δ -81.02 (tt, *J* = 9.7, 3.3 Hz, 3F), -113.29 – -113.57

(m, 2F), -124.34 – -124.66 (m, 2F), -125.75 – -125.96 (m, 2F). **FTIR (neat):**  $\tilde{\nu}$  = 2945, 1720, 1590,

1454, 1422, 1355, 1233, 1207, 1157, 1134, 1066 cm<sup>-1</sup>. **HRMS (ESI):** Exact mass calculated for

C<sub>20</sub>H<sub>19</sub>O<sub>3</sub>F<sub>9</sub>Na ([M+Na]<sup>+</sup>): 501.1083, mass found: 501.1098.

#### 7,7,8,8,9,9,10,10,10-Nonafluoro-5-(naphthalen-1-ylethynyl)decan-2-one (**3k**)

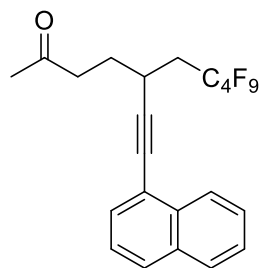

**3k**

**3k** was synthesized according to GP2 with **1k** (25 mg, 0.100 mmol), LiHMDS (0.12 mL, 0.120 mmol, 1.0 M in THF solution), LiOH (1 mg, 0.042 mmol), DABCO (17 mg, 0.152 mmol), and **2a** (31  $\mu$ L, 0.180 mmol) in 1.25 mL of DME under visible-light at 50 °C for 18 h. Purification by flash column chromatography (pentane/ethyl ether = 10/1) provided **3k** as a liquid (33 mg, 71%); **<sup>1</sup>H NMR** (300 MHz, CDCl<sub>3</sub>)  $\delta$  8.28 – 8.20 (m, 1H), 7.90 – 7.79 (m, 2H), 7.64 (dd,  $J$  = 7.2, 1.2 Hz, 1H), 7.61 – 7.48 (m, 2H), 7.42 (dd,  $J$  = 8.3, 7.1 Hz, 1H), 3.27 (ddd,  $J$  = 10.1, 5.0, 3.5 Hz, 1H), 2.92 – 2.74 (m, 2H), 2.65 – 2.32 (m, 2H), 2.21 (s, 3H), 2.16 – 2.07 (m, 1H), 1.98 – 1.84 (m, 1H). **<sup>13</sup>C NMR** (75 MHz, CDCl<sub>3</sub>)  $\delta$  207.44 , 133.33 , 133.18 , 130.47 , 128.66 , 128.31 , 126.77 , 126.38 , 125.86 , 125.15 , 120.56 , 94.17 , 81.45 , 40.95 , 36.37 (t,  $J$  = 21.1 Hz), 30.11 , 29.27 , 25.01 (t,  $J$  = 3.0 Hz). **<sup>19</sup>F NMR** (282 MHz, CDCl<sub>3</sub>)  $\delta$  -80.91 – -81.09 (m, 3F), -112.99 – -113.43 (m, 2F), -124.26 – -124.61 (m, 2F), -125.64 – -126.01 (m, 2F). **FTIR (neat)**:  $\tilde{\nu}$  = 3063, 1718, 1508, 1397, 1355, 1219, 1165, 1132, 1017 cm<sup>-1</sup>. **HRMS (ESI)**: Exact mass calculated for C<sub>22</sub>H<sub>17</sub>OF<sub>9</sub>Na ([M+Na]<sup>+</sup>): 491.1028, mass found: 491.1030.

#### 7,7,8,8,9,9,10,10,10-Nonafluoro-5-(pyridin-2-ylethynyl)decan-2-one (**3l**)

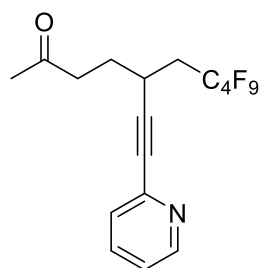

**3l**

**3l** was synthesized according to GP2 with **1l** (20 mg, 0.099 mmol), LiHMDS (0.12 mL, 0.120 mmol, 1.0 M in THF solution), LiOH (1 mg, 0.042 mmol), DABCO (17 mg, 0.152 mmol), and **2a** (31  $\mu$ L, 0.180 mmol) in 1.25 mL of DME under visible-light at 50 °C for 18 h. Purification by flash column chromatography (pentane/ethyl ether = 1/3) provided **3l** as a liquid (25 mg, 60%); **<sup>1</sup>H NMR** (300 MHz, CDCl<sub>3</sub>)  $\delta$  8.56 (ddd,  $J$  = 4.9, 1.9, 1.0 Hz, 1H), 7.64 (td,  $J$  = 7.7, 1.8 Hz, 1H), 7.39 (dt,  $J$  = 7.8, 1.1 Hz, 1H), 7.22 (ddd,  $J$  = 7.6, 4.9, 1.2 Hz, 1H), 3.13 (ddd,  $J$  = 10.0, 8.0, 5.0 Hz, 1H), 2.87 – 2.67 (m, 2H), 2.63 – 2.25 (m, 2H), 2.18 (s, 3H), 2.13 – 1.98 (m, 1H), 1.93 – 1.77 (m, 1H). **<sup>13</sup>C NMR** (75 MHz, CDCl<sub>3</sub>)  $\delta$  207.32 , 149.92 , 143.04 , 136.15 , 127.18 , 122.86 , 89.53 , 82.83 , 40.81 , 35.91 (t,  $J$  = 21.1 Hz), 30.06 , 28.76 , 24.59 (t,  $J$  = 3.1 Hz). **<sup>19</sup>F NMR** (282 MHz, CDCl<sub>3</sub>)  $\delta$  -81.03 (tt,  $J$  = 9.8, 3.3 Hz, 3F), -113.29 – -113.57 (m, 2F), -124.31 – -124.58 (m, 2F), -125.73 – -126.00 (m, 2F). **FTIR (neat)**:  $\tilde{\nu}$  = 2931, 1716, 1583, 1564, 1466, 1429, 1356, 1217, 1165, 1131, 1016 cm<sup>-1</sup>. **HRMS (ESI)**: Exact mass calculated for C<sub>17</sub>H<sub>14</sub>NOF<sub>9</sub>Na ([M+Na]<sup>+</sup>): 442.0824, mass found: 442.0823.

### 5-(Cyclohexylethynyl)-7,7,8,8,9,9,10,10,10-nonafluorodecan-2-one (3m)

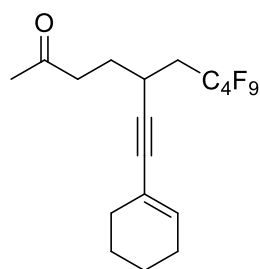

**3m**

**3m** was synthesized according to GP2 with **1m** (21 mg, 0.103 mmol), LiHMDS (0.12 mL, 0.120 mmol, 1.0 M in THF solution), LiOH (1 mg, 0.042 mmol), DABCO (17 mg, 0.152 mmol), and **2a** (31  $\mu$ L, 0.180 mmol) in 1.25 mL of DME under visible-light at 50 °C for 18 h. Purification by flash column chromatography (pentane/ethyl ether = 10/1) provided **3m** as a liquid (19 mg, 44%); **<sup>1</sup>H NMR** (300 MHz, CDCl<sub>3</sub>)  $\delta$  6.04 (p,  $J$  = 2.1 Hz, 1H), 2.96 (td,  $J$  = 10.0, 9.3, 5.0 Hz, 1H), 2.77 – 2.56 (m, 2H), 2.49 – 1.86 (m, 11H), 1.77 – 1.52 (m, 6H). **<sup>13</sup>C NMR** (75 MHz, CDCl<sub>3</sub>)  $\delta$  207.61, 134.45, 120.39, 86.42, 85.08, 40.93, 36.31 (t,  $J$  = 21.1 Hz), 30.07, 29.29, 29.19, 25.54, 24.59 (t,  $J$  = 3.0 Hz), 22.28, 21.49. **<sup>19</sup>F NMR** (282 MHz, CDCl<sub>3</sub>)  $\delta$  -81.04 (tt,  $J$  = 9.7, 3.3 Hz, 3F), -113.33 – -113.66 (m, 2F), -124.40 – -124.64 (m, 2F), -125.75 – -126.00 (m, 2F). **FTIR (neat)**:  $\tilde{\nu}$  = 2934, 2364, 2335, 1718, 1437, 1355, 1217, 1164, 1131, 1108, 1022 cm<sup>-1</sup>. **HRMS (ESI)**: Exact mass calculated for C<sub>18</sub>H<sub>19</sub>OF<sub>9</sub>Na ([M+Na]<sup>+</sup>): 445.1184, mass found: 445.1188.

### 5-(2,2,3,3,4,4,5,5,5-Nonafluoropentyl)undec-6-yn-2-one (3n)

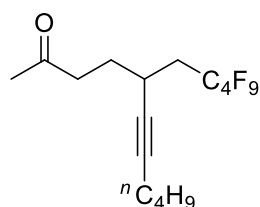

**3n**

**3n** was synthesized according to GP2 with **1n** (18 mg, 0.100 mmol), LiHMDS (0.12 mL, 0.120 mmol, 1.0 M in THF solution), LiOH (1 mg, 0.042 mmol), DABCO (17 mg, 0.152 mmol), and **2a** (31  $\mu$ L, 0.180 mmol) in 1.25 mL of DME under visible-light at 50 °C for 18 h. Purification by flash column chromatography (pentane/ethyl ether = 10/1) provided **3n** as a liquid (16 mg, 40%); **<sup>1</sup>H NMR** (300 MHz, CDCl<sub>3</sub>)  $\delta$  2.81 (ddd,  $J$  = 7.1, 4.8, 2.4 Hz, 1H), 2.65 (dt,  $J$  = 8.2, 6.3 Hz, 2H), 2.38 – 2.21 (m, 1H), 2.20 – 2.11 (m, 5H), 1.97 – 1.83 (m, 1H), 1.72 – 1.32 (m, 6H), 0.90 (t,  $J$  = 7.2 Hz, 3H). **<sup>13</sup>C NMR** (75 MHz, CDCl<sub>3</sub>)  $\delta$  207.72, 83.43, 79.82, 40.97, 36.47 (t,  $J$  = 20.8 Hz), 30.89, 30.03, 29.37, 24.15 (t,  $J$  = 3.1 Hz), 21.85, 18.28, 13.52. **<sup>19</sup>F NMR** (282 MHz, CDCl<sub>3</sub>)  $\delta$  -81.05 (tt,  $J$  = 9.7, 3.4 Hz, 3F), -113.37 – -113.67 (m, 2F), -124.47 – -124.72 (m, 2F), -125.73 – -126.03 (m, 2F). **FTIR (neat)**:  $\tilde{\nu}$  = 2960, 1720, 1437, 1356, 1218, 1203, 1165, 1132, 1109 cm<sup>-1</sup>. **HRMS (ESI)**: Exact mass calculated for C<sub>17</sub>H<sub>14</sub>NOF<sub>9</sub>Na ([M+Na]<sup>+</sup>): 421.1184, mass found: 421.1195.

### 5-(2,2,3,3,4,4,5,5,5-Nonafluoropentyl)undec-6-yn-2-one (3o)

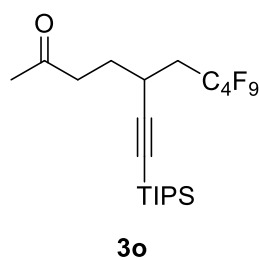

**3o** was synthesized according to GP2 with **1o** (28 mg, 0.100 mmol), LiHMDS (0.12 mL, 0.120 mmol, 1.0 M in THF solution), LiOH (1 mg, 0.042 mmol), DABCO (17 mg, 0.152 mmol), and **2a** (31  $\mu$ L, 0.180 mmol) in 1.25 mL of DME under visible-light at 50 °C for 18 h. Purification by flash column chromatography (pentane/ethyl ether = 10/1) provided **3o** as a liquid (41 mg, 82%); <sup>1</sup>H NMR (300 MHz, CDCl<sub>3</sub>)  $\delta$  2.92 (ddd,  $J$  = 10.3, 5.1, 3.6 Hz, 1H), 2.72 (t,  $J$  = 7.3 Hz, 2H), 2.47 – 2.07 (m, 5H), 2.03 – 1.90 (m, 1H), 1.72 – 1.60 (m, 1H), 1.08 – 1.03 (m, 21H). <sup>13</sup>C NMR (75 MHz, CDCl<sub>3</sub>)  $\delta$  207.42, 107.95, 83.78, 40.74, 36.49 (t,  $J$  = 21.1 Hz), 29.99, 29.15, 24.97 (t,  $J$  = 3.2 Hz), 18.57, 18.49, 11.17. <sup>19</sup>F NMR (282 MHz, CDCl<sub>3</sub>)  $\delta$  -81.08 (tt,  $J$  = 9.7, 3.4 Hz, 3F), -112.06 – -114.26 (m, 2F), -124.47 – -124.74 (m, 2F), -125.80 – -126.04 (m, 2F). **FTIR (neat):**  $\tilde{\nu}$  = 2944, 2893, 2867, 1721, 1464, 1356, 1234, 1133, 1018 cm<sup>-1</sup>. **HRMS (ESI):** Exact mass calculated for C<sub>17</sub>H<sub>14</sub>NOF<sub>9</sub>Na ([M+Na]<sup>+</sup>): 521.1893, mass found: 521.1888.

#### 10,10,11,11,12,12,13,13,13-Nonafluoro-8-(phenylethynyl)tridecan-5-one (**3p**)

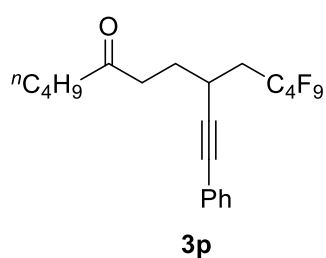

**3p** was synthesized according to GP2 with **1p** (24 mg, 0.099 mmol), LiHMDS (0.12 mL, 0.120 mmol, 1.0 M in THF solution), LiOH (1 mg, 0.042 mmol), DABCO (17 mg, 0.152 mmol), and **2a** (31  $\mu$ L, 0.180 mmol) in 1.25 mL of DME under visible-light at 50 °C for 18 h. Purification by flash column chromatography (pentane/ethyl ether = 30/1) provided **3p** as a liquid (29 mg, 64%); <sup>1</sup>H NMR (300 MHz, CDCl<sub>3</sub>)  $\delta$  7.43 – 7.36 (m, 2H), 7.30 (dt,  $J$  = 5.0, 2.0 Hz, 3H), 3.10 (dt,  $J$  = 8.0, 5.0 Hz, 1H), 2.71 (dd,  $J$  = 8.0, 6.5 Hz, 2H), 2.53 – 2.22 (m, 4H), 2.12 – 1.95 (m, 1H), 1.88 – 1.72 (m, 1H), 1.63 – 1.52 (m, 2H), 1.38 – 1.27 (m, 2H), 0.90 (t,  $J$  = 7.3 Hz, 3H). <sup>13</sup>C NMR (75 MHz, CDCl<sub>3</sub>)  $\delta$  209.97, 131.59, 128.26, 128.15, 123.00, 89.36, 83.28, 42.78, 39.87, 36.23 (t,  $J$  = 21.0 Hz), 29.12, 26.00, 24.74 (t,  $J$  = 3.1 Hz), 22.34, 13.79. <sup>19</sup>F NMR (282 MHz, CDCl<sub>3</sub>)  $\delta$  -80.93 – -81.11 (m, 3F), -113.22 – -113.54 (m, 2F), -124.29 – -124.63 (m, 2F), -125.68 – -126.01 (m, 2F). **FTIR (neat):**  $\tilde{\nu}$  = 2964, 1715, 1599, 1491, 1444, 1413, 1380, 1355, 1220, 1169, 1132, 1070, 1019 cm<sup>-1</sup>. **HRMS (ESI):** Exact mass calculated for C<sub>21</sub>H<sub>21</sub>OF<sub>9</sub>Na ([M+Na]<sup>+</sup>): 483.1341, mass found: 483.1351.

#### 8,8,9,9,10,10,11,11,11-Nonafluoro-2-methyl-6-(phenylethynyl)undecan-3-one (**3q**)

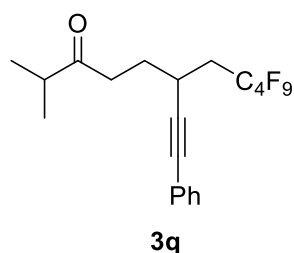

**3q** was synthesized according to GP2 with **1q** (23 mg, 0.101 mmol), LiHMDS (0.12 mL, 0.120 mmol, 1.0 M in THF solution), LiOH (1 mg, 0.042 mmol), DABCO (17 mg, 0.152 mmol), and **2a** (31  $\mu$ L, 0.180 mmol) in 1.25 mL of DME under visible-light at 50 °C for 18 h. Purification by flash column chromatography (pentane/ethyl ether = 30/1) provided **3q** as a liquid (28 mg, 62%); <sup>1</sup>H NMR (300 MHz, CDCl<sub>3</sub>)  $\delta$  7.43 – 7.35 (m, 2H), 7.34 – 7.27 (m, 3H), 3.10 (ddd,  $J$  = 10.3, 5.1, 3.2 Hz, 1H), 2.76 (td,  $J$  = 6.8, 6.1, 1.6 Hz, 2H), 2.64 (p,  $J$  = 6.9 Hz, 1H), 2.56 – 2.18 (m, 2H), 2.03 (ddt,  $J$  = 13.4, 7.6, 3.8 Hz, 1H), 1.89 – 1.70 (m, 1H), 1.13 (dd,  $J$  = 7.0, 3.3 Hz, 6H). <sup>13</sup>C NMR (75 MHz, CDCl<sub>3</sub>)  $\delta$  213.50, 131.58, 128.27, 128.14, 123.03, 89.40, 83.26, 41.04, 37.46, 36.27 (t,  $J$  = 21.0 Hz), 29.17, 24.72 (t,  $J$  = 3.0 Hz), 18.33, 18.21. <sup>19</sup>F NMR (282 MHz, CDCl<sub>3</sub>)  $\delta$  -81.03 (tt,  $J$  = 9.6, 3.3 Hz, 3F), -113.30 – -113.51 (m, 2F), -124.38 – -124.59 (m, 2F), -125.75 – -125.95 (m, 2F). FTIR (neat):  $\tilde{\nu}$  = 2975, 1713, 1491, 1355, 1217, 1132, 1019 cm<sup>-1</sup>. HRMS (ESI): Exact mass calculated for C<sub>21</sub>H<sub>21</sub>OF<sub>9</sub>Na ([M+Na]<sup>+</sup>): 469.1184, mass found: 469.1189.

#### 6,6,7,7,8,8,8,9,9,9-Nonafluoro-1-phenyl-4-(phenylethynyl)nonan-1-one (**3r**)

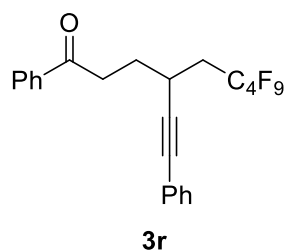

**3r** was synthesized according to GP2 with **1r** (26 mg, 0.099 mmol), LiHMDS (0.12 mL, 0.120 mmol, 1.0 M in THF solution), LiOH (1 mg, 0.042 mmol), DABCO (17 mg, 0.152 mmol), and **2a** (31  $\mu$ L, 0.180 mmol) in 1.25 mL of DME under visible-light at 50 °C for 18 h. Purification by flash column chromatography (pentane/ethyl ether = 45/1) provided **3r** as a yellow solid (42 mg, 88%); MP: 43 °C; <sup>1</sup>H NMR (300 MHz, CDCl<sub>3</sub>)  $\delta$  8.05 – 7.96 (m, 2H), 7.62 – 7.53 (m, 1H), 7.52 – 7.43 (m, 2H), 7.42 – 7.34 (m, 2H), 7.32 – 7.26 (m, 3H), 3.35 – 3.26 (m, 2H), 3.26 – 3.16 (m, 1H), 2.65 – 2.30 (m, 2H), 2.29 – 2.16 (m, 1H), 2.08 – 1.91 (m, 1H). <sup>13</sup>C NMR (75 MHz, CDCl<sub>3</sub>)  $\delta$  199.03, 136.83, 133.16, 131.60, 128.64, 128.25, 128.15, 128.04, 122.97, 89.43, 83.44, 36.31 (t,  $J$  = 21.1 Hz), 35.95, 29.70, 24.92. <sup>19</sup>F NMR (282 MHz, CDCl<sub>3</sub>)  $\delta$  -81.01 (tt,  $J$  = 9.7, 3.3 Hz, 3F), -113.25 – -113.47 (m, 2F), -124.32 – -124.57 (m, 2F), -125.72 – -125.94 (m, 2F). FTIR (neat):  $\tilde{\nu}$  = 2951, 1680, 1599, 1491, 1451, 1354, 1282, 1229, 1196, 1129, 1102, 1013 cm<sup>-1</sup>. HRMS (ESI): Exact mass calculated for C<sub>23</sub>H<sub>17</sub>OF<sub>9</sub>Na ([M+Na]<sup>+</sup>): 503.1028, mass found: 503.1037.

Chiral **3r** was synthesized according to GP2 with chiral **1r** (26 mg, 0.099 mmol), LiHMDS (0.12 mL, 0.120 mmol, 1.0 M in THF solution), LiOH (1 mg, 0.042 mmol), DABCO (17 mg, 0.152 mmol), and

**2a** (31  $\mu$ L, 0.180 mmol) in 1.25 mL of DME under visible-light at 50  $^{\circ}$ C for 18 h. Purification by flash column chromatography (pentane/ethyl ether = 45/1) provided chiral **3r** as a yellow solid (39 mg, 82%);  $^1\text{H}$  NMR (300 MHz,  $\text{CDCl}_3$ )  $\delta$  8.05 – 7.97 (m, 2H), 7.62 – 7.54 (m, 1H), 7.52 – 7.43 (m, 2H), 7.43 – 7.34 (m, 2H), 7.33 – 7.26 (m, 3H), 3.35 – 3.16 (m, 3H), 2.66 – 2.16 (m, 3H), 2.08 – 1.94 (m, 1H). The pure product was analyzed by chiral HPLC. Chiral HPLC (Chiralcel OJ-RH column with guard, 20  $^{\circ}$ C, 1 mL/min, MeCN:H<sub>2</sub>O = 65:35); Elution time:  $t_{\text{major}}$  = 8.734 min and  $t_{\text{minor}}$  = 10.047 min, enantiomeric excess (7%).

### 7,7,8,8,9,9,10,10,10-Nonafluoro-5-methyl-5-(phenylethynyl)decan-2-one (**3s**)

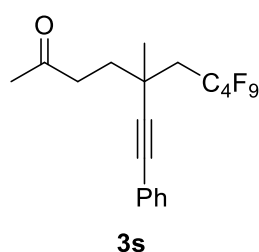

**3s** was synthesized according to GP2 with **1s** (21 mg, 0.098 mmol), LiHMDS (0.12 mL, 0.120 mmol, 1.0 M in THF solution), LiOH (1 mg, 0.042 mmol), DABCO (17 mg, 0.152 mmol), and **2a** (31  $\mu$ L, 0.180 mmol) in 1.25 mL of DME under visible-light at 50  $^{\circ}$ C for 18 h. Purification by flash column chromatography (pentane/ethyl ether = 15/1) provided **3s** as a liquid (31 mg, 73%);  $^1\text{H}$  NMR (300 MHz,  $\text{CDCl}_3$ )  $\delta$  7.41 – 7.34 (m, 2H), 7.30 (dt,  $J$  = 5.1, 1.6 Hz, 3H), 2.72 (dd,  $J$  = 8.7, 7.0 Hz, 2H), 2.51 – 2.23 (m, 2H), 2.20 (s, 3H), 2.10 – 1.86 (m, 2H), 1.48 (d,  $J$  = 1.1 Hz, 3H).  $^{13}\text{C}$  NMR (75 MHz,  $\text{CDCl}_3$ )  $\delta$  207.54, 131.54, 128.25, 128.11, 123.02, 92.25, 83.06, 40.24 (t,  $J$  = 20.0 Hz), 39.43, 35.71, 32.79, 30.06, 26.97 (t,  $J$  = 2.1 Hz).  $^{19}\text{F}$  NMR (282 MHz,  $\text{CDCl}_3$ )  $\delta$  -81.06 (td,  $J$  = 9.7, 4.8 Hz, 3F), -110.35 – -112.84 (m, 2F), -124.41 – -124.69 (m, 2F), -125.54 – -125.77 (m, 2F). FTIR (neat):  $\tilde{\nu}$  = 2942, 1719, 1491, 1354, 1218, 1131, 1071, 1025  $\text{cm}^{-1}$ . HRMS (ESI): Exact mass calculated for  $\text{C}_{19}\text{H}_{17}\text{OF}_9\text{Na}$  ( $[\text{M}+\text{Na}]^+$ ): 455.1028, mass found: 455.1046.

### 7,7,8,8,9,9,10,10,10-Nonafluoro-6,6-dimethyl-5-(phenylethynyl)decan-2-one (**3t**)

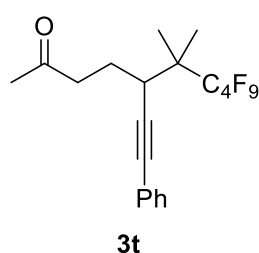

**3t** was synthesized according to GP2 with **1t** (23 mg, 0.101 mmol), LiHMDS (0.12 mL, 0.120 mmol, 1.0 M in THF solution), LiOH (1 mg, 0.042 mmol), DABCO (17 mg, 0.152 mmol), and **2a** (31  $\mu$ L, 0.180 mmol) in 1.25 mL of DME under visible-light at 50  $^{\circ}$ C for 18 h. Purification by flash column chromatography (pentane/ethyl ether = 15/1) provided **3t** as a liquid (19 mg, 42%);  $^1\text{H}$  NMR (300 MHz,  $\text{CDCl}_3$ )  $\delta$  7.38 – 7.32 (m, 2H), 7.29 (dt,  $J$  = 5.1, 1.8 Hz, 3H), 2.86 – 2.60 (m, 2H), 2.41 – 2.22 (m, 1H), 2.20 – 1.98 (m, 5H), 1.52 (d,  $J$  = 2.0 Hz, 3H), 1.48 (s, 3H).  $^{13}\text{C}$

**NMR** (75 MHz, CDCl<sub>3</sub>)  $\delta$  207.17 , 131.43 , 128.26 , 127.97 , 123.22 , 95.04 , 81.73 , 48.60 – 47.83 (m), 43.66 , 35.51 (d,  $J$  = 2.4 Hz), 29.76 , 29.47 (d,  $J$  = 5.7 Hz), 26.93 – 26.61 (m), 20.97 – 20.60 (m). **<sup>19</sup>F NMR** (282 MHz, CDCl<sub>3</sub>)  $\delta$  -80.90 (tt,  $J$  = 9.9, 3.5 Hz, 3F), -108.57 – -112.47 (m, 2F), -119.98 – -123.35 (m, 2F), -124.34 – -127.10 (m, 2F). **FTIR (neat)**:  $\tilde{\nu}$  = 2984, 1720, 1598, 1491, 1419, 1351, 1233, 1217, 1166, 1016 cm<sup>-1</sup>. **HRMS (ESI)**: Exact mass calculated for C<sub>20</sub>H<sub>19</sub>OF<sub>9</sub>Na ([M+Na]<sup>+</sup>): 469.1184, mass found: 469.1192.

### 6,6,7,7,8,8,9,9,9-Nonafluoro-2,2-dimethyl-1-phenyl-4-(phenylethynyl)nonan-1-one (3u)

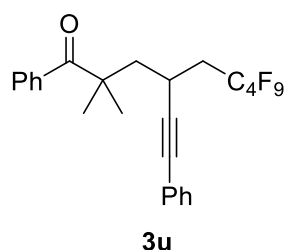

**3u** was synthesized according to GP2 with **1u** (29 mg, 0.100 mmol), LiHMDS (0.12 mL, 0.120 mmol, 1.0 M in THF solution), LiOH (1 mg, 0.042 mmol), DABCO (17 mg, 0.152 mmol), and **2a** (31  $\mu$ L, 0.180 mmol) in 1.25 mL of DME under visible-light at 50 °C for 18 h. Purification by flash column chromatography (pentane/ethyl ether = 50/1) provided **3u** as a liquid (23 mg, 57%); **<sup>1</sup>H NMR** (300 MHz, CDCl<sub>3</sub>)  $\delta$  7.71 – 7.64 (m, 2H), 7.43 – 7.30 (m, 3H), 7.22 (dd,  $J$  = 6.1, 2.4 Hz, 5H), 3.23 – 3.10 (m, 1H), 2.57 – 2.23 (m, 3H), 2.00 (dd,  $J$  = 13.8, 3.7 Hz, 1H), 1.48 (s, 3H), 1.46 (s, 3H). **<sup>13</sup>C NMR** (75 MHz, CDCl<sub>3</sub>)  $\delta$  207.83 , 138.74 , 131.39 , 130.79 , 128.07 , 128.02 , 127.99 , 123.00 , 90.42 , 83.90 , 47.58 , 45.62 , 37.24 (t,  $J$  = 20.8 Hz), 27.44 , 25.94 , 22.25 (t,  $J$  = 2.9 Hz). **<sup>19</sup>F NMR** (282 MHz, CDCl<sub>3</sub>)  $\delta$  -81.01 (tt,  $J$  = 9.7, 3.3 Hz, 3F), -113.08 – -113.54 (m, 2F), -124.35 – -124.76 (m, 2F), -125.60 – -126.06 (m, 2F). **FTIR (neat)**:  $\tilde{\nu}$  = 2971, 1674, 1491, 1353, 1217, 1131, 1019 cm<sup>-1</sup>. **HRMS (ESI)**: Exact mass calculated for C<sub>25</sub>H<sub>21</sub>OF<sub>9</sub>Na ([M+Na]<sup>+</sup>): 531.1341, mass found: 531.1342.

### 7-Phenyl-5-(2,2,2-trifluoroethyl)hept-6-yn-2-one (3v)

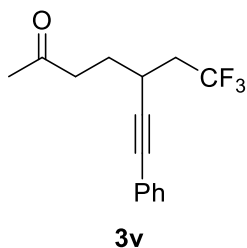

**3v** was synthesized according to GP2 with **1a** (20 mg, 0.100 mmol), LiHMDS (0.12 mL, 0.120 mmol, 1.0 M in THF solution), LiOH (1 mg, 0.042 mmol), DABCO (17 mg, 0.152 mmol), and **2b** (60  $\mu$ L, 0.180 mmol, 0.588 g/mL in DME) in 1.25 mL of DME under visible-light at 50 °C for 8 h. Then second part of **2b** (60  $\mu$ L, 0.180 mmol, 0.588 g/mL in DME) was added and the reaction was reacted for another 16 h. Purification by flash column chromatography (pentane/ethyl ether = 10/1) provided **3v** as a liquid (11 mg, 41%); **<sup>1</sup>H NMR** (300



MHz, CDCl<sub>3</sub>)  $\delta$  7.42 – 7.36 (m, 2H), 7.34 – 7.27 (m, 3H), 3.05 – 2.93 (m, 1H), 2.83 – 2.63 (m, 2H), 2.52 – 2.39 (m, 1H), 2.37 – 2.25 (m, 1H), 2.19 (s, 3H), 2.06 – 1.94 (m, 1H), 1.83 – 1.73 (m, 1H). <sup>13</sup>C NMR (75 MHz, CDCl<sub>3</sub>)  $\delta$  207.51, 131.59, 128.27, 128.16, 126.54 (q,  $J$  = 117.8 Hz), 122.99, 88.95, 83.42, 40.87, 39.34 (q,  $J$  = 27.9 Hz), 30.10, 28.51, 26.96 (q,  $J$  = 3.0 Hz). <sup>19</sup>F NMR (282 MHz, CDCl<sub>3</sub>)  $\delta$  -64.12. FTIR (neat):  $\tilde{\nu}$  = 2929, 1718, 1491, 1381, 1255, 1164, 1140, 1111 cm<sup>-1</sup>. HRMS (ESI): Exact mass calculated for C<sub>15</sub>H<sub>15</sub>OF<sub>3</sub>Na ([M+Na]<sup>+</sup>): 291.0966, mass found: 291.0967.

**7,7,8,8,9,9,10,10,11,11,12,12,12-Tridecafluoro-5-(phenylethynyl)dodecan-2-one (3w)**

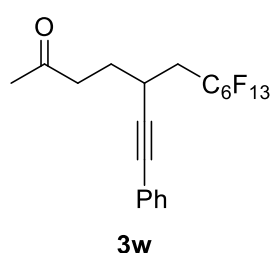

**3w** was synthesized according to GP2 with **1a** (20 mg, 0.100 mmol), LiHMDS (0.12 mL, 0.120 mmol, 1.0 M in THF solution), LiOH (1 mg, 0.042 mmol), DABCO (17 mg, 0.152 mmol), and **2c** (39  $\mu$ L, 0.180 mmol) in 1.25 mL of DME under visible-light at 50 °C for 18 h. Purification by flash column chromatography (pentane/ethyl ether = 10/1) provided **3w** as a liquid (32 mg, 62%); <sup>1</sup>H NMR (300 MHz, CDCl<sub>3</sub>)  $\delta$  7.42 – 7.37 (m, 2H), 7.33 – 7.27 (m, 3H), 3.10 (ddt,  $J$  = 9.9, 8.0, 5.0 Hz, 1H), 2.84 – 2.65 (m, 2H), 2.59 – 2.23 (m, 2H), 2.19 (s, 3H), 2.03 (dtd,  $J$  = 15.3, 7.3, 4.5 Hz, 1H), 1.81 (dtd,  $J$  = 10.1, 7.6, 3.9 Hz, 1H). <sup>13</sup>C NMR (75 MHz, CDCl<sub>3</sub>)  $\delta$  207.45, 131.58, 128.27, 128.18, 122.95, 89.26, 83.32, 40.88, 36.29 (t,  $J$  = 21.0 Hz), 30.08, 29.09, 24.73 (t,  $J$  = 2.9 Hz). <sup>19</sup>F NMR (282 MHz, CDCl<sub>3</sub>)  $\delta$  -80.80 (tt,  $J$  = 10.0, 5.0 Hz, 3F), -113.09 – -113.30 (m, 2F), -121.58 – -121.93 (m, 2F), -122.66 – -123.00 (m, 2F), -123.42 – -123.69 (m, 2F), -125.97 – -126.23 (m, 2F). FTIR (neat):  $\tilde{\nu}$  = 2954, 1719, 1491, 1444, 1360, 1318, 1235, 1190, 1164, 1144, 1122, 1049, 1027 cm<sup>-1</sup>. HRMS (ESI): Exact mass calculated for C<sub>20</sub>H<sub>15</sub>OF<sub>13</sub>Na ([M+Na]<sup>+</sup>): 541.0808, mass found: 541.0819.

**7,7,8,8,9,9,10,10,11,11,12,12,13,13,14,14,14-Heptadecafluoro-5-(phenylethynyl)tetradecan-2-one (3x)**

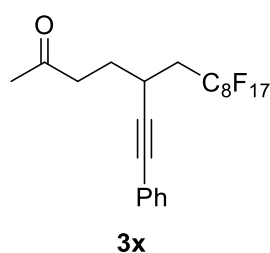

**3x** was synthesized according to GP2 with **1a** (20 mg, 0.100 mmol), LiHMDS (0.12 mL, 0.120 mmol, 1.0 M in THF solution), LiOH (1 mg, 0.042 mmol), DABCO (17 mg, 0.152 mmol), and **2d** (48  $\mu$ L, 0.182 mmol) in 1.25 mL of DME under visible-light at 50 °C for 18 h. Purification by

flash column chromatography (pentane/ethyl ether = 10/1) provided **3x** as a yellow solid (34 mg, 55%); **MP**: 39 °C; **<sup>1</sup>H NMR** (300 MHz, CDCl<sub>3</sub>) δ 7.43 – 7.35 (m, 2H), 7.30 (dt, *J* = 3.8, 2.7 Hz, 3H), 3.09 (ddd, *J* = 9.9, 8.0, 4.9 Hz, 1H), 2.84 – 2.64 (m, 2H), 2.53 – 2.23 (m, 2H), 2.19 (s, 3H), 2.11 – 1.97 (m, 1H), 1.88 – 1.75 (m, 1H). **<sup>13</sup>C NMR** (75 MHz, CDCl<sub>3</sub>) δ 207.45 , 131.59 , 128.27 , 128.18 , 122.96 , 89.27 , 83.32 , 40.89 , 36.30 (t, *J* = 21.0 Hz), 30.08 , 29.09 , 24.73 (t, *J* = 3.1 Hz). **<sup>19</sup>F NMR** (282 MHz, CDCl<sub>3</sub>) δ -80.79 (t, *J* = 9.8 Hz, 3F), -113.18 (t, *J* = 14.5 Hz, 2F), -121.37 – -121.68 (m, 2F), -121.70 – -122.04 (m, 4F), -122.45 – -122.90 (m, 2F), -123.30 – -123.72 (m, 2F), -125.90 – -126.26 (m, 2F). **FTIR (neat)**:  $\tilde{\nu}$  = 2944, 1718, 1600, 191, 1443, 1370, 1329, 1236, 1200, 1145, 1134, 1113, 1027 cm<sup>-1</sup>. **HRMS (ESI)**: Exact mass calculated for C<sub>22</sub>H<sub>15</sub>OF<sub>17</sub>Na ([M+Na]<sup>+</sup>): 641.0744, mass found: 641.0740.

**7,7,8,8,9,9,10,10,11,11,12,12,13,13,14,14,15,15,16,16,16-Henicosafuoro-5-(phenylethynyl)hexadecan-2-one (3y)**

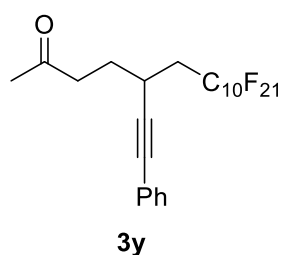

**3y** was synthesized according to GP2 with **1a** (20 mg, 0.100 mmol), LiHMDS (0.12 mL, 0.120 mmol, 1.0 M in THF solution), LiOH (1 mg, 0.042 mmol), DABCO (17 mg, 0.152 mmol), and **2e** (116 mg, 0.180 mmol) in 1.25 mL of DME under visible-light at 50 °C for 18 h. Purification by flash column chromatography (pentane/ethyl ether = 10/1) provided **3y** as a white solid (34 mg, 47%); **MP**: 69 °C; **<sup>1</sup>H NMR** (300 MHz, CDCl<sub>3</sub>) δ 7.43 – 7.35 (m, 2H), 7.34 – 7.27 (m, 3H), 3.10 (ddt, *J* = 9.9, 8.0, 4.9 Hz, 1H), 2.86 – 2.64 (m, 2H), 2.60 – 2.23 (m, 2H), 2.19 (s, 3H), 2.11 – 1.96 (m, 1H), 1.90 – 1.72 (m, 1H). **<sup>13</sup>C NMR** (75 MHz, CDCl<sub>3</sub>) δ 207.46 , 131.59 , 128.28 , 128.18 , 122.96 , 89.27 , 83.32 , 40.89 , 36.31 (t, *J* = 21.0 Hz), 30.09 , 29.10 , 24.74 (t, *J* = 3.0 Hz). **<sup>19</sup>F NMR** (282 MHz, CDCl<sub>3</sub>) δ -80.71 – -80.84 (m, 3F), -113.08 – -113.30 (m, 2F), -121.31 – -122.07 (m, 10F), -122.68 (brs, 2F), -123.51 (brs, 2F), -125.92 – -126.24 (m, 2F). **FTIR (neat)**:  $\tilde{\nu}$  = 2962, 1718, 1491, 1444, 1372, 1211, 1150, 1110, 1053 cm<sup>-1</sup>. **HRMS (ESI)**: Exact mass calculated for C<sub>24</sub>H<sub>15</sub>OF<sub>21</sub>Na ([M+Na]<sup>+</sup>): 741.0680, mass found: 741.0680.

**8-Chloro-7,7,8,8-tetrafluoro-5-(phenylethynyl)octan-2-one (3z)**

**3z** was synthesized according to GP2 with **1a** (20 mg, 0.100 mmol), LiHMDS (0.12 mL, 0.120 mmol, 1.0 M in THF solution), LiOH (1 mg, 0.042 mmol), DABCO (17 mg, 0.152 mmol), and **2f** (47 mg, 0.179 mmol) in 1.25 mL of DME under visible-light at 50 °C for 18 h. Purification by flash column

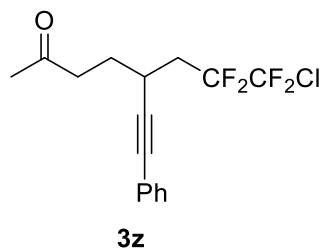

chromatography (pentane/ethyl ether = 10/1) provided **3z** as a liquid (27 mg, 81%); **<sup>1</sup>H NMR** (300 MHz, CDCl<sub>3</sub>) δ 7.43 – 7.36 (m, 2H), 7.34 – 7.27 (m, 3H), 3.08 (ddt, *J* = 10.0, 8.0, 5.0 Hz, 1H), 2.85 – 2.63 (m, 2H), 2.60 – 2.23 (m, 2H), 2.19 (s, 3H), 2.11 – 1.96 (m, 1H), 1.88 – 1.76 (m, 1H). **<sup>13</sup>C NMR** (75 MHz, CDCl<sub>3</sub>) δ 207.51, 131.58, 128.26, 128.14, 123.00, 89.39, 83.28, 40.91, 36.02 (t, *J* = 21.4 Hz), 30.09, 29.03, 25.08 (t, *J* = 2.8 Hz). **<sup>19</sup>F NMR** (282 MHz, CDCl<sub>3</sub>) δ -71.45 (t, *J* = 2.3 Hz, 2F), -113.02 – -113.09 (m, 2F). **FTIR (neat)**:  $\tilde{\nu}$  = 2958, 1717, 1599, 1419, 1443, 1374, 1252, 1212, 1148, 1094, 1050, 1026 cm<sup>-1</sup>. **HRMS (ESI)**: Exact mass calculated for C<sub>16</sub>H<sub>15</sub>O<sup>35</sup>ClF<sub>4</sub>Na ([M+Na]<sup>+</sup>): 357.0640, mass found: 357.0650.

#### 8,8,9,9,10,10,11,11,11-Nonafluoro-6-(phenylethynyl)undecan-2-one (3va)

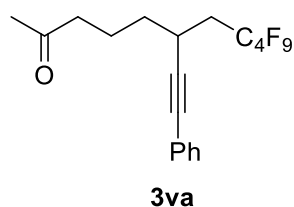

**3va** was synthesized according to GP2 with **1v** (21 mg, 0.098 mmol), LiHMDS (0.12 mL, 0.120 mmol, 1.0 M in THF solution), LiOH (1 mg, 0.042 mmol), DABCO (17 mg, 0.152 mmol), and **2a** (31 μL, 0.180 mmol) in 1.25 mL of DME under visible-light at 50 °C for 18 h. Purification by flash column chromatography (pentane/ethyl ether = 10/1) provided **3va** as a liquid (28 mg, 66%); **<sup>1</sup>H NMR** (300 MHz, CDCl<sub>3</sub>) δ 7.43 – 7.35 (m, 2H), 7.29 (ddd, *J* = 3.4, 2.5, 1.5 Hz, 3H), 3.06 (tt, *J* = 8.3, 5.3 Hz, 1H), 2.57 – 2.21 (m, 4H), 2.16 (s, 3H), 1.96 – 1.86 (m, 1H), 1.86 – 1.72 (m, 1H), 1.71 – 1.55 (m, 2H). **<sup>13</sup>C NMR** (75 MHz, CDCl<sub>3</sub>) δ 208.11, 131.60, 128.23, 128.03, 123.15, 89.79, 82.88, 43.01, 35.96 (t, *J* = 21.0 Hz), 34.69, 29.87, 25.15 (t, *J* = 3.2 Hz), 21.15. **<sup>19</sup>F NMR** (282 MHz, CDCl<sub>3</sub>) δ -81.03 (tt, *J* = 9.7, 3.3 Hz, 3F), -113.34 – -113.61 (m, 2F), -124.36 – -124.60 (m, 2F), -125.73 – -125.95 (m, 2F). **FTIR (neat)**:  $\tilde{\nu}$  = 2942, 1718, 1599, 1491, 1444, 1356, 1222, 1167, 1133 cm<sup>-1</sup>. **HRMS (ESI)**: Exact mass calculated for C<sub>19</sub>H<sub>17</sub>OF<sub>9</sub>Na ([M+Na]<sup>+</sup>): 455.1028, mass found: 455.1030.

## 4. Follow-up chemistry

### 7,7,8,8,9,9,10,10,10-nonafluoro-5-(phenylethynyl)decan-2-ol (4)

To a flame-dried Schlenk tube equipped with a magnetic stir bar LiAlH<sub>4</sub> (0.050 mmol, 1 M in THF, 0.050 mL), THF (1 mL) and **3a** (21 mg, 0.050 mmol) were added sequentially under Ar atmosphere. The mixture was allowed to stir at 80 °C for 3 h. After that, the reaction was quenched with 5 mL of H<sub>2</sub>O at 0 °C. Then 5 mL of saturated potassium sodium tartrate solution was added into this mixture.

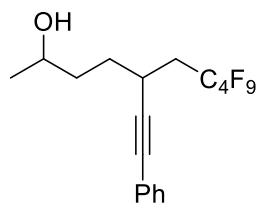

**4**, d.r. = 1:1

The mixture was extracted with 5 mL of ethyl ether three times. The organic phase was combined, washed with brine and dried over Na<sub>2</sub>SO<sub>4</sub>. The solvent was then removed and the residue was purified by flash column chromatography (pentane/ethyl acetate = 10/1) to provide **4** as a liquid (16 mg, 76%, d.r. = 1:1); **<sup>1</sup>H NMR** (600 MHz, C<sub>6</sub>D<sub>6</sub>) δ 7.46 – 7.40 (m, 2H), 7.00 – 6.94 (m, 3H), 3.47 – 3.41 (m, 1H), 2.92 – 2.84 (m, 1H), 2.26 – 2.15 (m, 1H), 1.99 – 1.90 (m, 1H), 1.56 – 1.46 (m, 2H), 1.38 – 1.30 (m, 2H), 0.93 (d, *J* = 6.2 Hz, 1.46H), & 0.93 (d, *J* = 6.1 Hz, 1.49H), 0.65 (s, 1H). **<sup>13</sup>C NMR** (75 MHz, C<sub>6</sub>D<sub>6</sub>) δ 131.89, 128.54, 128.19, 123.84, 90.61 & 90.48, 83.46 & 83.40, 67.45 & 66.94, 36.81 & 36.50, 36.21, 36.72 – 35.92 (m), 32.09 & 31.76, 25.67 (t, *J* = 3.3 Hz) & 25.34 (t, *J* = 2.8 Hz), 23.86 & 23.77. **<sup>19</sup>F NMR** (282 MHz, C<sub>6</sub>D<sub>6</sub>) δ -81.06 – -81.21 (m), -112.01 – -114.47 (m), -124.15 – -124.41 (m), -125.72 – -125.92 (m). **FTIR (neat)**:  $\tilde{\nu}$  = 3349, 2969, 2928, 1355, 1217, 1131, 1070, 1016 cm<sup>-1</sup>. **HRMS (ESI)**: Exact mass calculated for C<sub>18</sub>H<sub>17</sub>OF<sub>9</sub>Na ([M+Na]<sup>+</sup>): 443.1028, mass found: 443.1002.

#### 7,7,8,8,9,9,10,10,10-Nonafluoro-5-phenethyldecan-2-one (**5**)

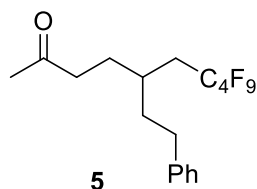

**5**

To a flame-dried Schlenk tube equipped with a magnetic stir bar Palladium 5% on activated carbon (5 mg, 0.0023 mmol), **3a** (21 mg, 0.050 mmol), and MeOH (1 mL) were added sequentially under H<sub>2</sub> atmosphere. The mixture was allowed to stir at room temperature with a H<sub>2</sub> balloon for 23 h. After

that, the solvent was then removed and the residue was purified by flash column chromatography (pentane/ethyl ether = 20/1) to provide **5** as a liquid (17 mg, 80%); **<sup>1</sup>H NMR** (600 MHz, CDCl<sub>3</sub>) δ 7.26 – 7.17 (m, 2H), 7.16 – 7.06 (m, 3H), 2.61 – 2.50 (m, 2H), 2.37 (t, *J* = 7.7 Hz, 2H), 2.08 (s, 3H), 2.05 – 1.79 (m, 3H), 1.74 – 1.59 (m, 4H). **<sup>13</sup>C NMR** (75 MHz, CDCl<sub>3</sub>) δ 141.55, 128.47, 128.26, 126.01, 40.44, 36.09, 33.85 (t, *J* = 21.0 Hz), 32.54, 30.56, 29.92, 27.80. **<sup>19</sup>F NMR** (282 MHz, CDCl<sub>3</sub>) δ -81.05 (tt, *J* = 9.7, 3.3 Hz), -112.94 – -113.11 (m), -124.33 – -124.51 (m), -125.72 – -125.91 (m). **FTIR (neat)**:  $\tilde{\nu}$  = 2923, 1719, 1497, 1455, 1356, 1217, 1131, 1046, 1022 cm<sup>-1</sup>. **HRMS (ESI)**: Exact mass calculated for C<sub>18</sub>H<sub>19</sub>OF<sub>9</sub>Na ([M+Na]<sup>+</sup>): 445.1184, mass found: 445.1188.

#### (2-Methyl-5-(2,2,3,3,4,4,5,5,5-nonafluoropentyl)cyclopent-1-en-1-yl)(phenyl)methanone (**6**)

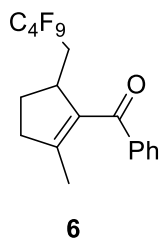

To a flame-dried Schlenk tube equipped with a magnetic stir bar **3a** (21 mg, 0.050 mmol), MeOH (1 mL) and TfOH (0.2  $\mu$ L, 0.002 mmol) were added sequentially under Ar atmosphere. The mixture was allowed to stir at 80 °C for 5 h. After that, the solvent was removed and the residue was purified by flash column chromatography (pentane/ethyl acetate = 80/1) provided **6** as a liquid (16 mg, 76%);<sup>3</sup> **<sup>1</sup>H NMR** (600 MHz, C<sub>6</sub>D<sub>6</sub>)  $\delta$  7.71 – 7.65 (m, 2H), 7.13 – 7.03 (m, 3H), 3.68 – 3.51 (m, 1H), 2.93 – 2.66 (m, 1H), 2.08 – 1.75 (m, 4H), 1.51 – 1.39 (m, 1H), 1.23 (s, 3H). **<sup>13</sup>C NMR** (75 MHz, C<sub>6</sub>D<sub>6</sub>)  $\delta$  195.25, 149.77, 139.64, 137.59, 132.55, 129.04, 128.66, 41.66, 38.74, 34.27 (t,  $J$  = 20.8 Hz), 29.61, 16.69. **<sup>19</sup>F NMR** (282 MHz, C<sub>6</sub>D<sub>6</sub>)  $\delta$  -80.88 – -81.24 (m), -110.49 – -114.70 (m), -124.08 – -124.43 (m), -125.55 – -125.84 (m). **FTIR (neat)**:  $\tilde{\nu}$  = 2935, 1640, 1349, 1216, 1131, 1101, 1017 cm<sup>-1</sup>. **HRMS (ESI)**: Exact mass calculated for C<sub>18</sub>H<sub>15</sub>OF<sub>9</sub>Na ([M+Na]<sup>+</sup>): 441.0871, mass found: 441.0847.

**(5-Methyl-2-(2,2,3,3,4,4,5,5,5-nonafluoropentyl)cyclopent-1-en-1-yl)(phenyl)methanone (6)**

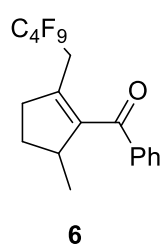

To a flame-dried Schlenk tube equipped with a magnetic stir bar AuCl<sub>3</sub> (0.6 mg, 0.002 mmol), AgSbF<sub>6</sub> (2.0 mg, 0.006 mmol), **3a** (42 mg, 0.100 mmol), and toluene (1 mL) were added sequentially under Ar atmosphere. The mixture was allowed to stir at 100 °C for 18 h. After that, 5 mL of H<sub>2</sub>O was added to the mixture and then the aqueous phase was extracted with 5 mL of ethyl acetate three times. The combined organic phase was washed with brine and dried over Na<sub>2</sub>SO<sub>4</sub>. The solvent was then removed and the residue was purified by flash column chromatography (pentane/ethyl acetate = 350/1) provided **6** as a liquid (25 mg, 60%);<sup>4</sup> **<sup>1</sup>H NMR** (300 MHz, CDCl<sub>3</sub>)  $\delta$  7.81 – 7.72 (m, 2H), 7.60 – 7.52 (m, 1H), 7.50 – 7.42 (m, 2H), 3.70 – 3.54 (m, 1H), 2.70 – 2.44 (m, 3H), 2.40 – 2.30 (m, 1H), 2.03 – 1.86 (m, 1H), 1.85 – 1.73 (m, 1H), 1.62 (d, 7H). **<sup>13</sup>C NMR** (75 MHz, CDCl<sub>3</sub>)  $\delta$  196.50, 150.82, 139.00, 137.49, 132.84, 128.87, 128.61, 41.38, 39.06, 34.04 (t,  $J$  = 21.0 Hz), 29.62, 16.98. **<sup>19</sup>F NMR** (282 MHz, CDCl<sub>3</sub>)  $\delta$  -80.98 – -81.24 (m), -111.01 – -115.27 (m), -124.37 – -124.58 (m), -125.79 – -126.05 (m).

## 5. References:

- (1) G. A. Phillips, C. Palmer, A. C. Stevens, M. L. Piotrowski, D. S. R. Dekruyf, B. L. Pagenkopf, *Tetrahedron Letter* **2015**, 56, 6052-6055.
- (2) P. G. Cozzi, S. Alesi, *Chem. Commun.* **2004**, 2448-2449.

(3) T. Jin, F. Yang, C. Liu, Y. Yamamoto, *Chem. Commun.* **2009**, 3533-3535.

(4) T. Jin, Y. Yamamoto, *Org. Lett.* **2007**, 9, 5259-5262.

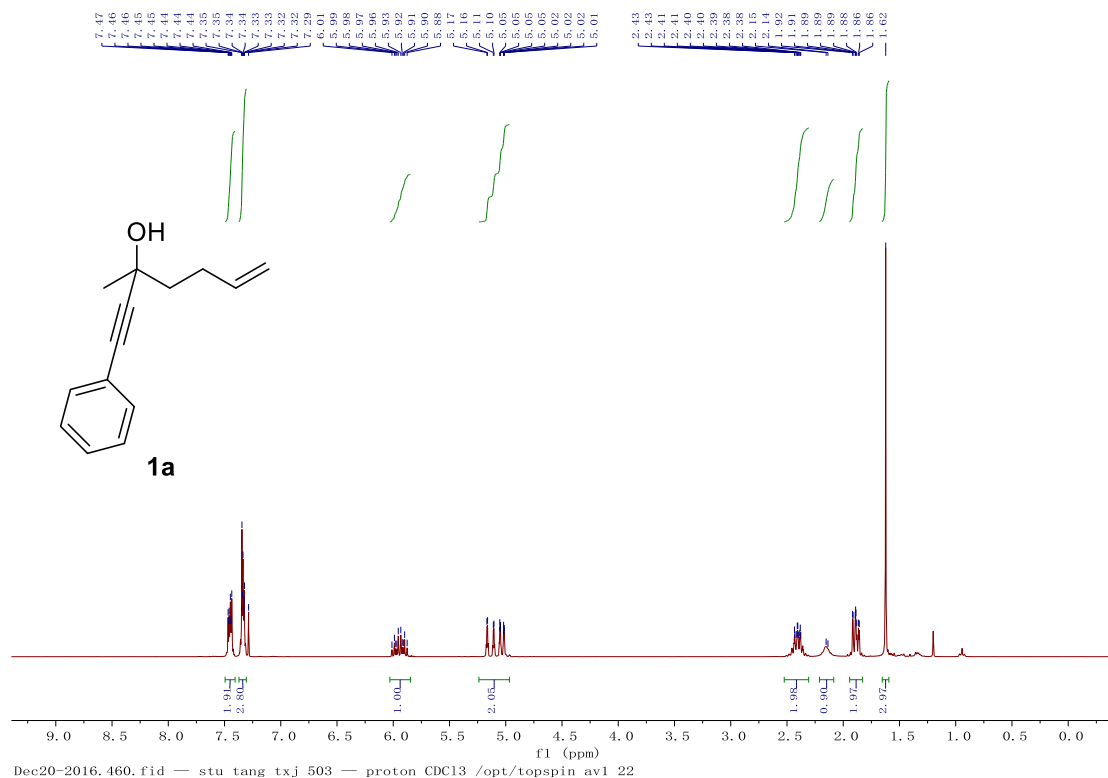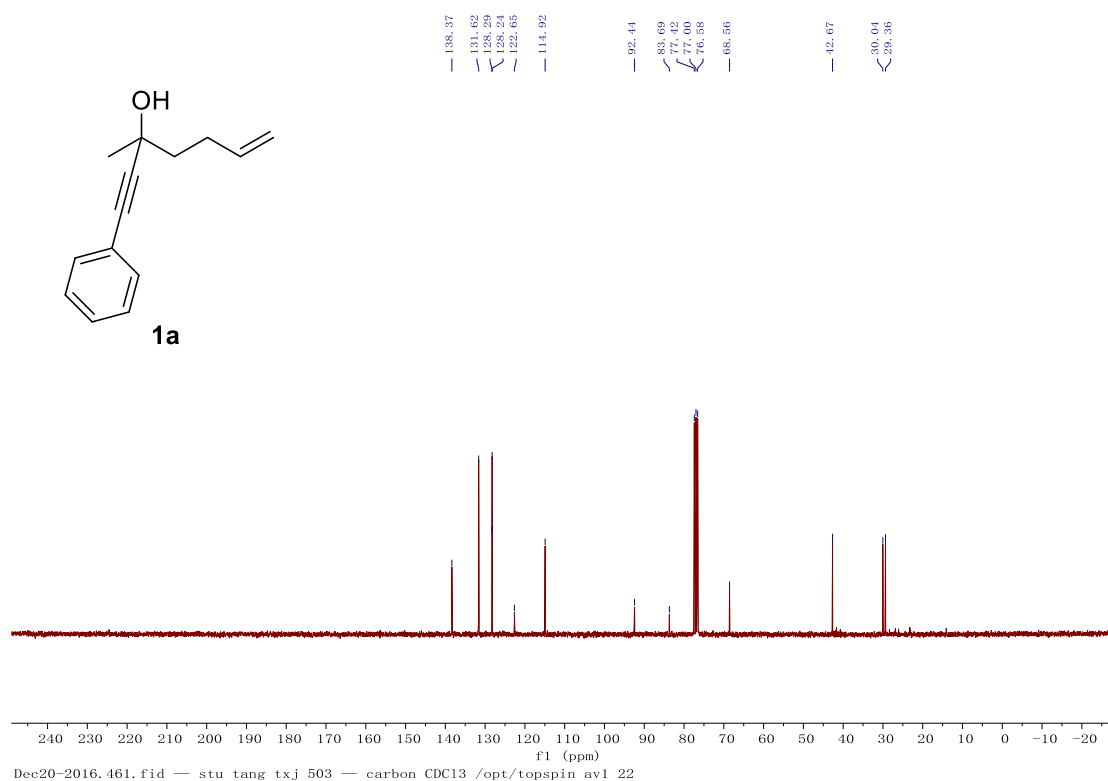

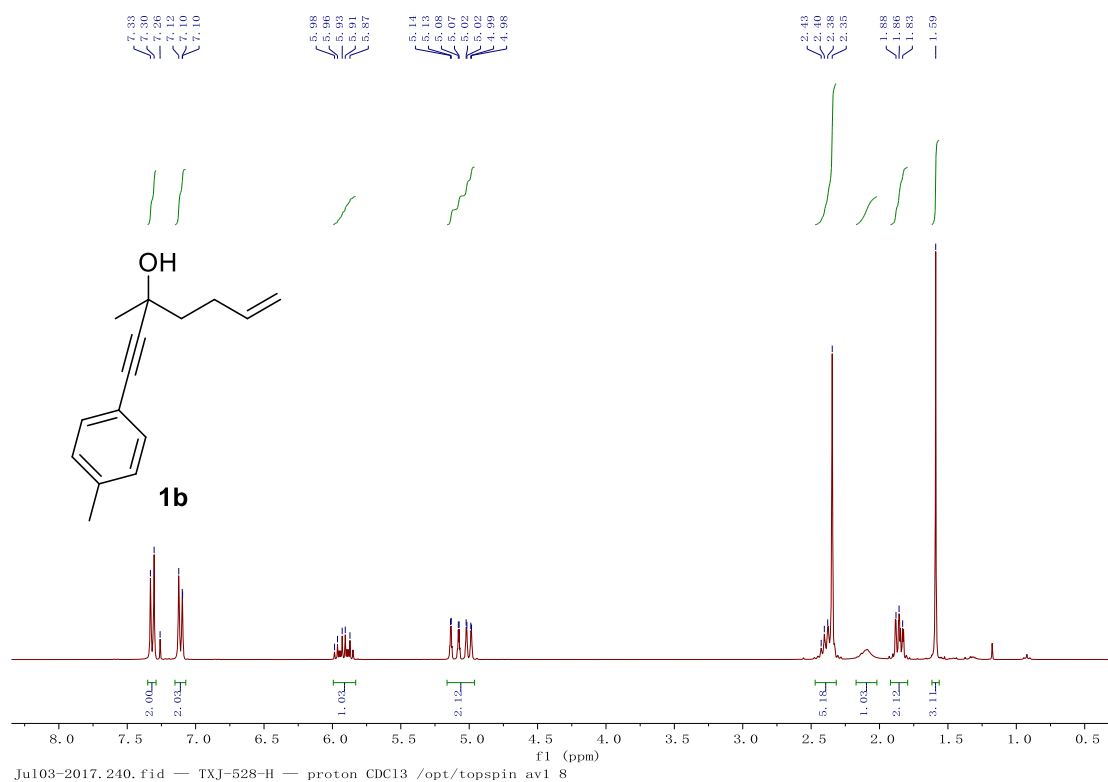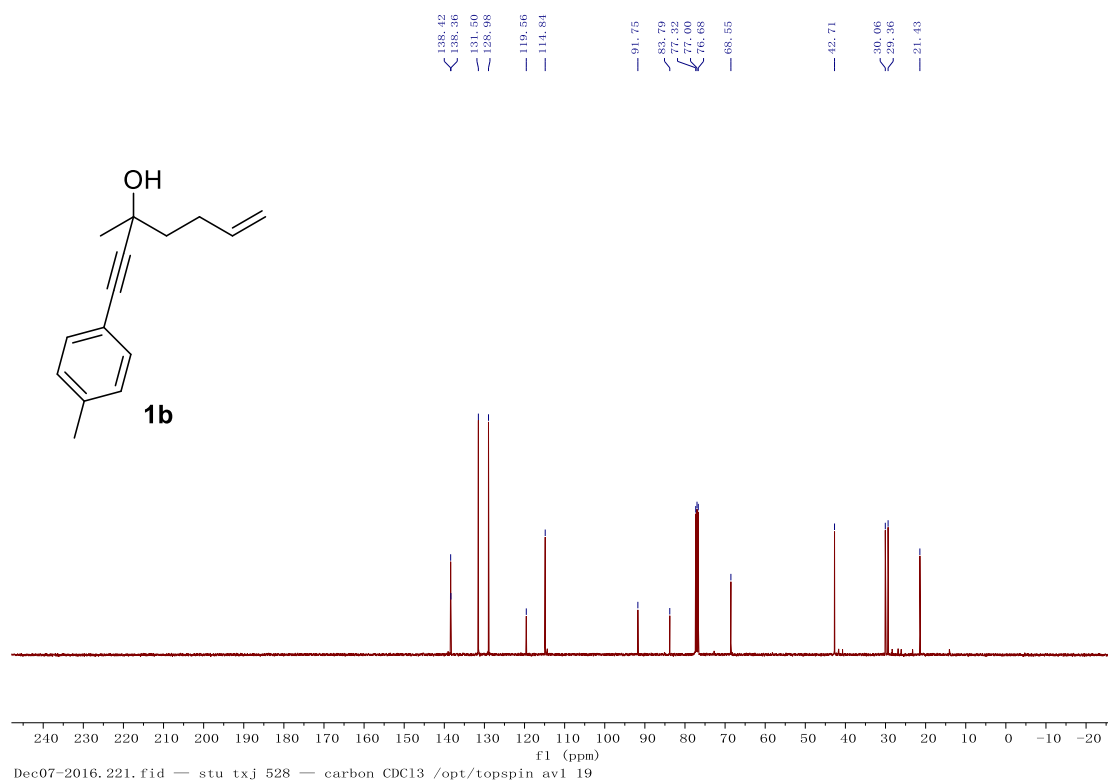

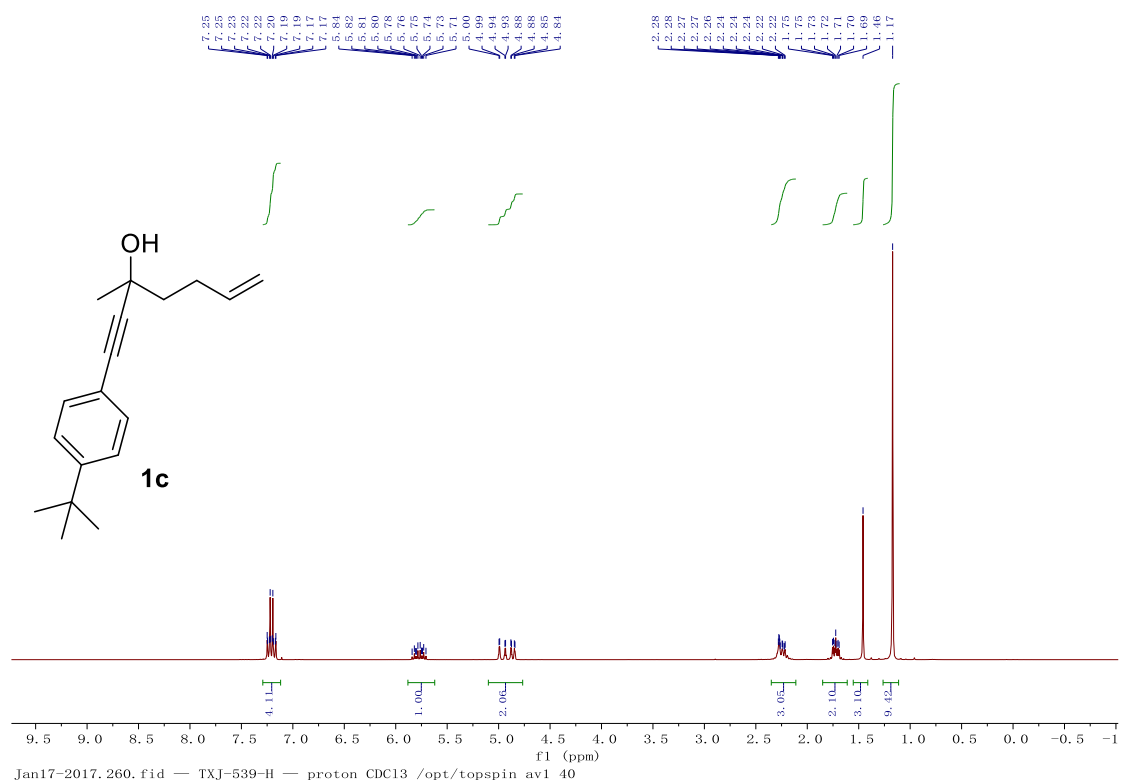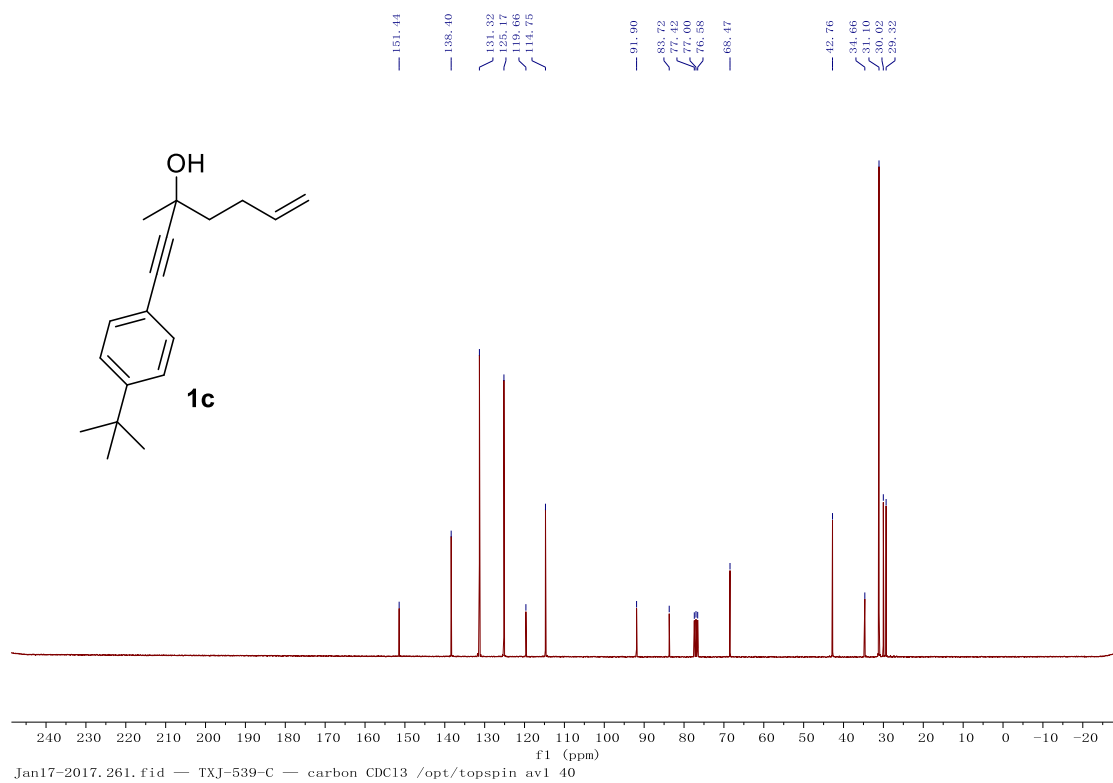



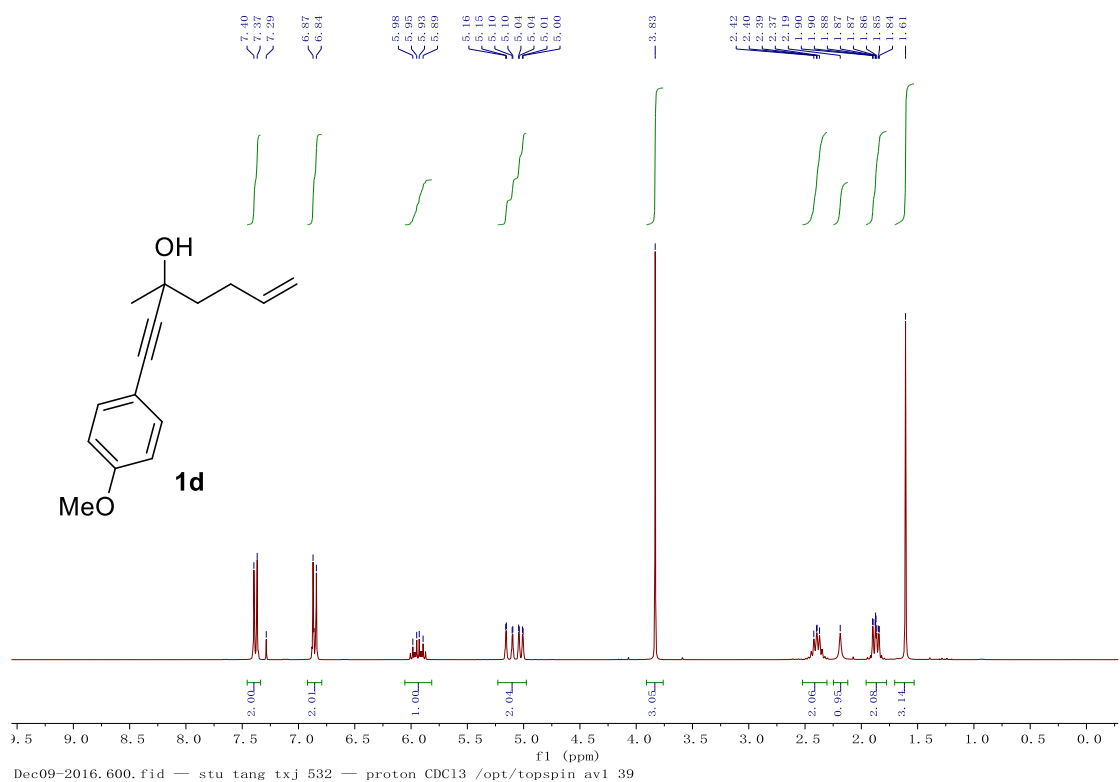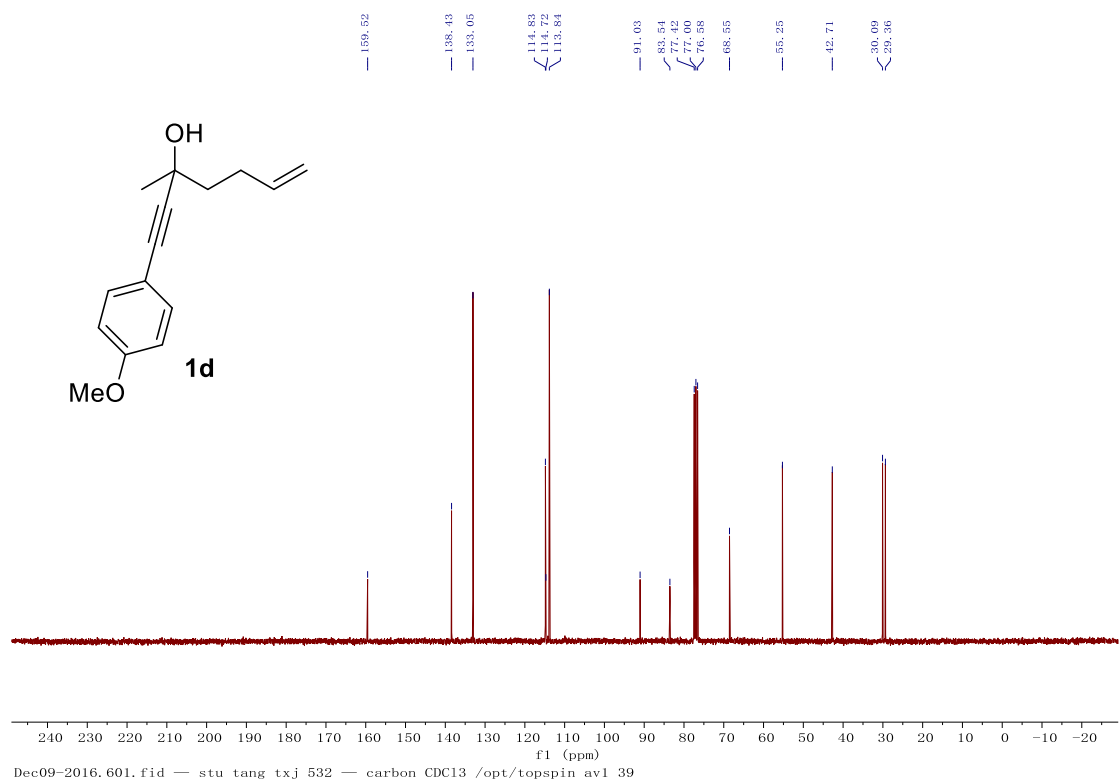

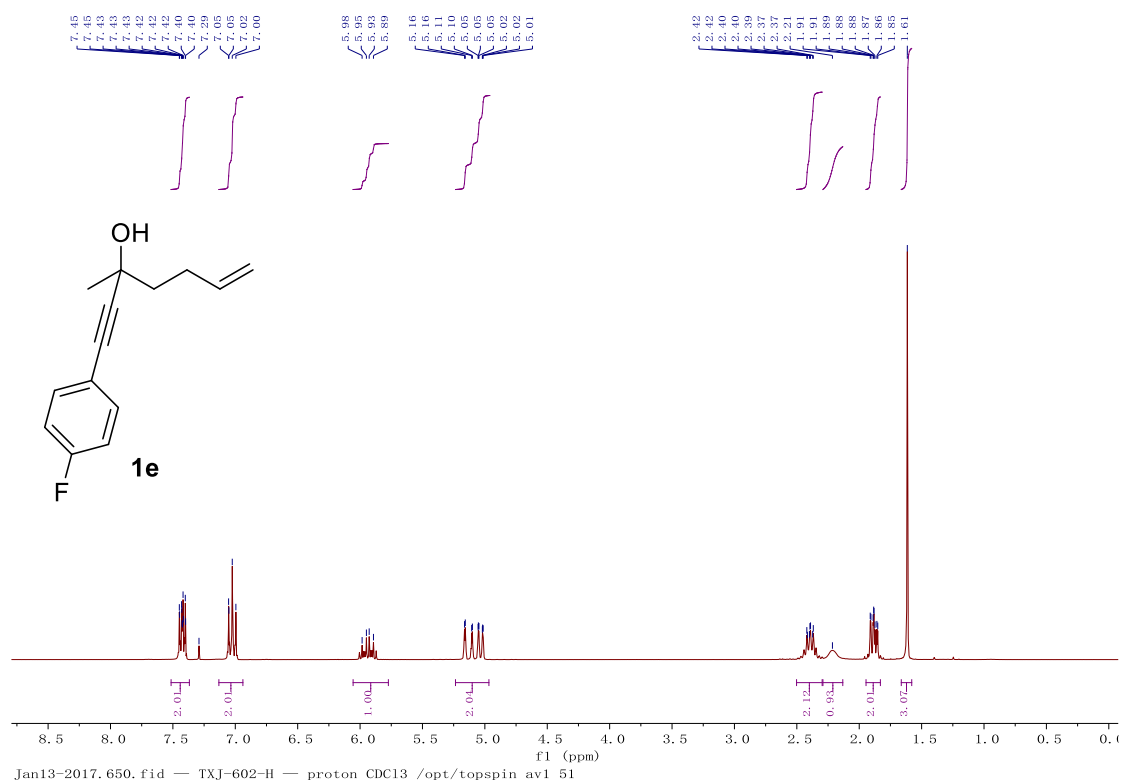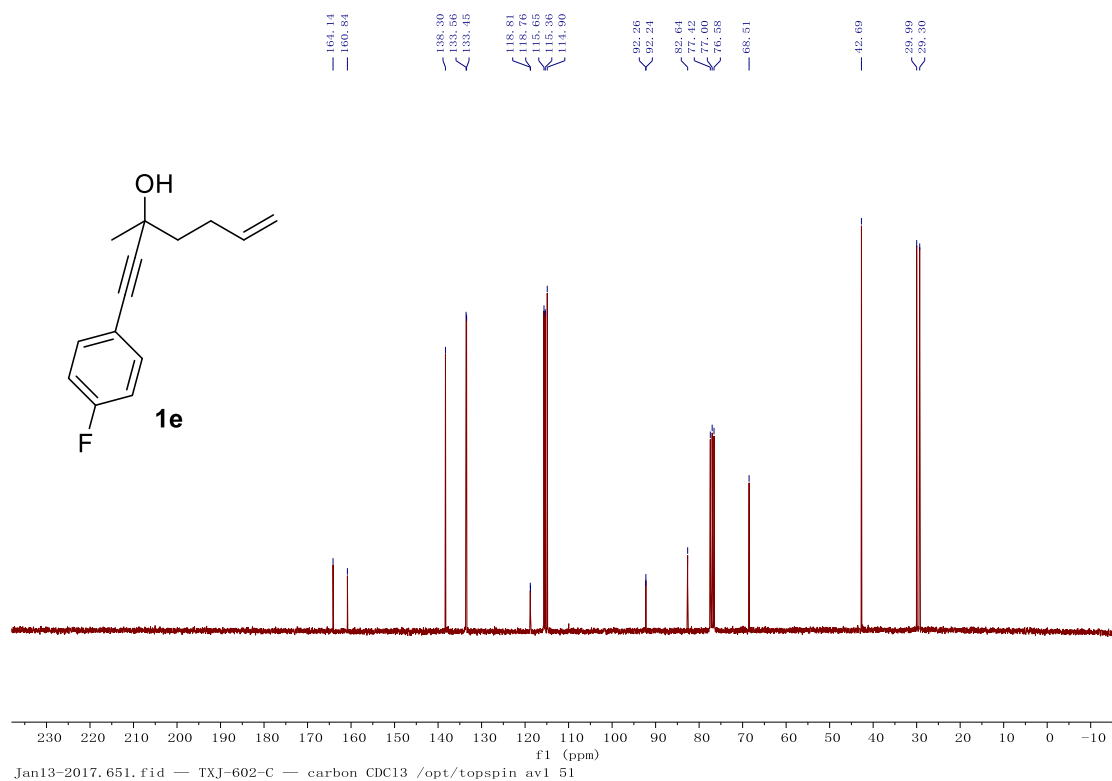

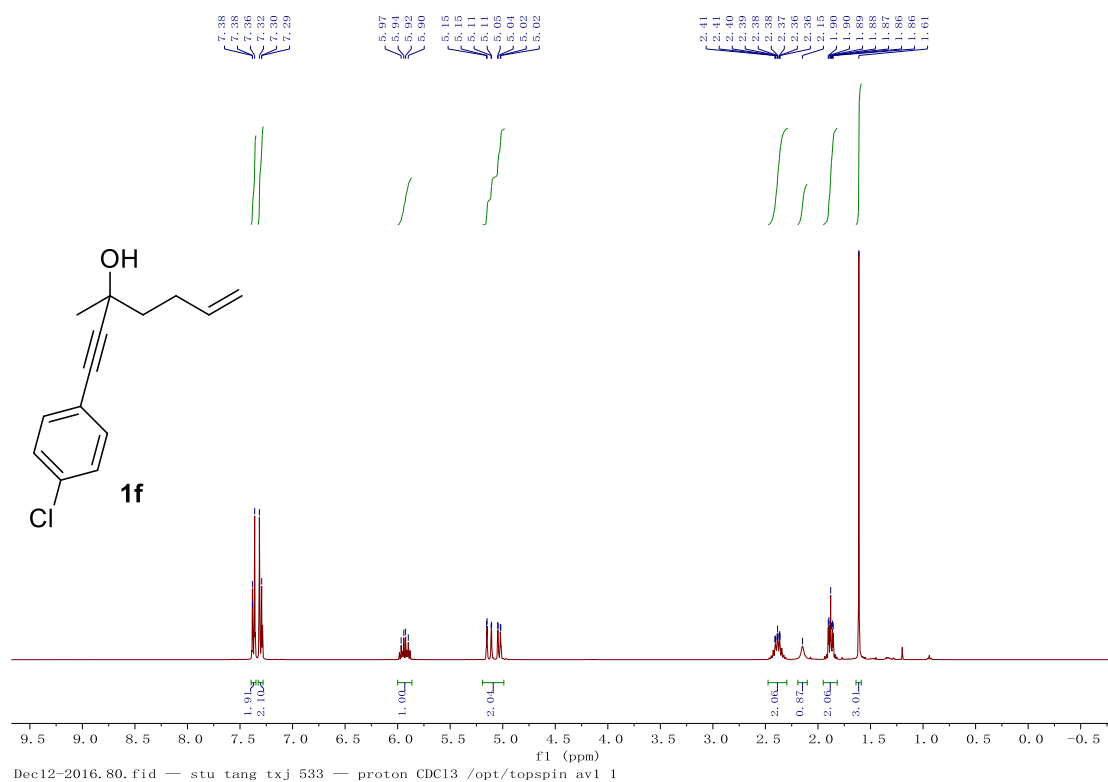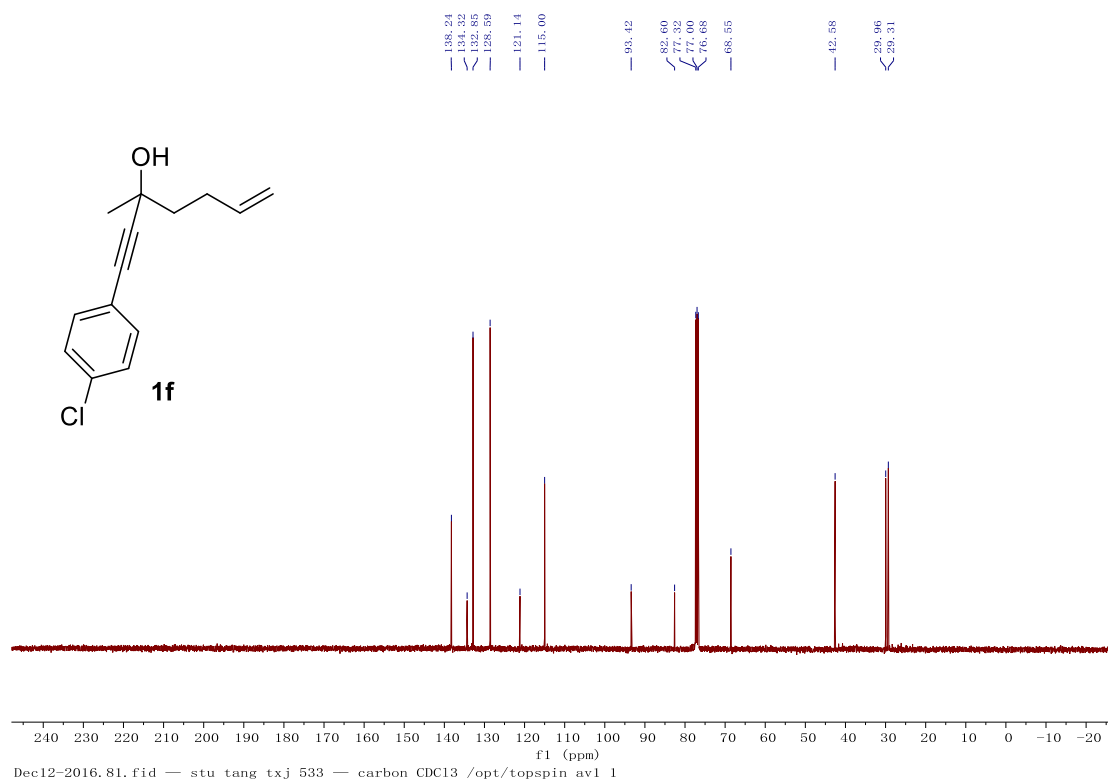

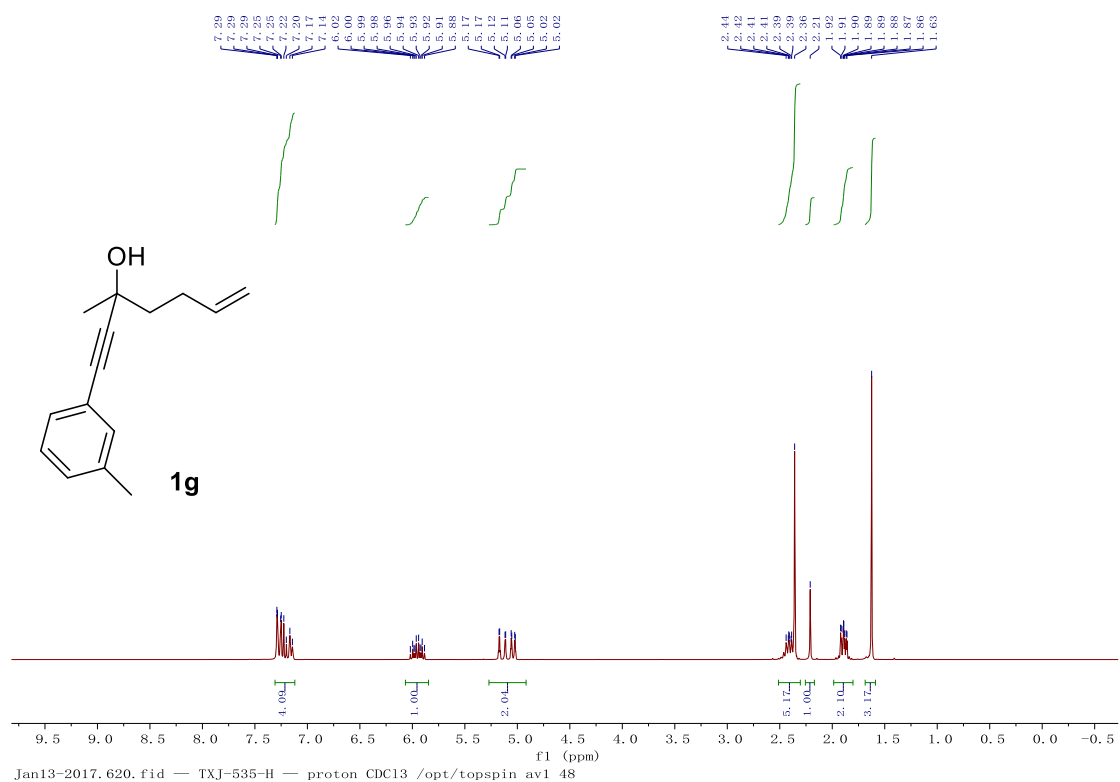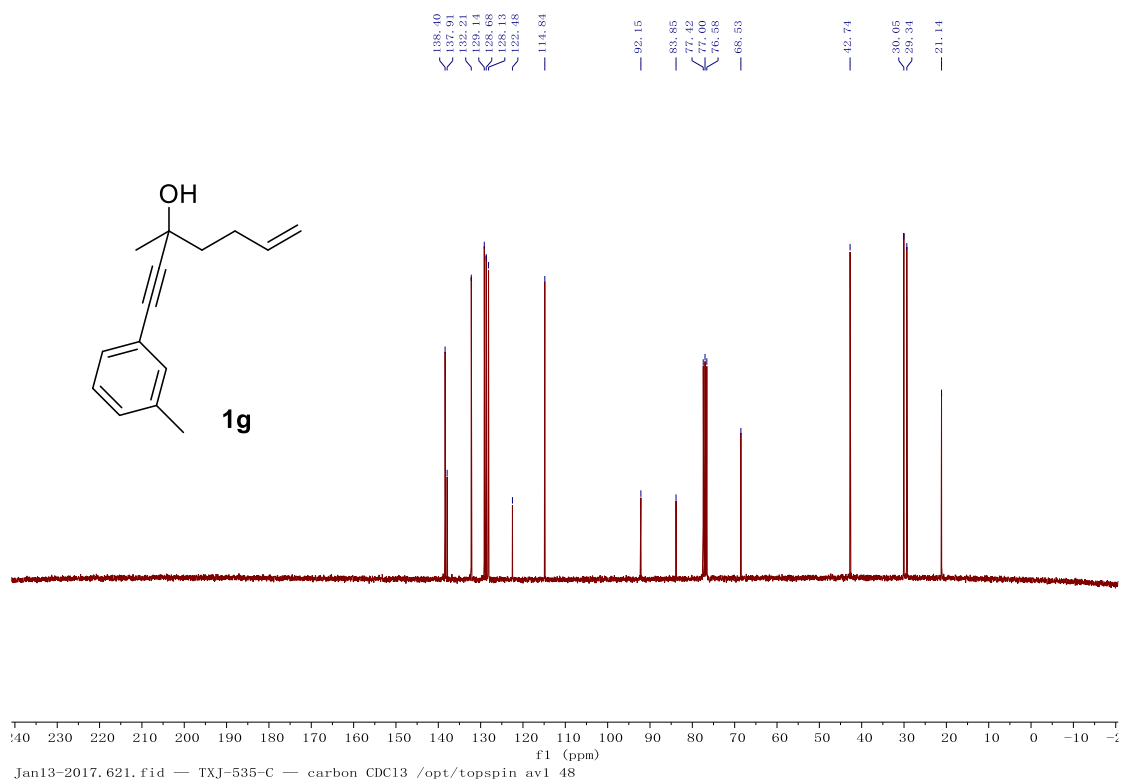

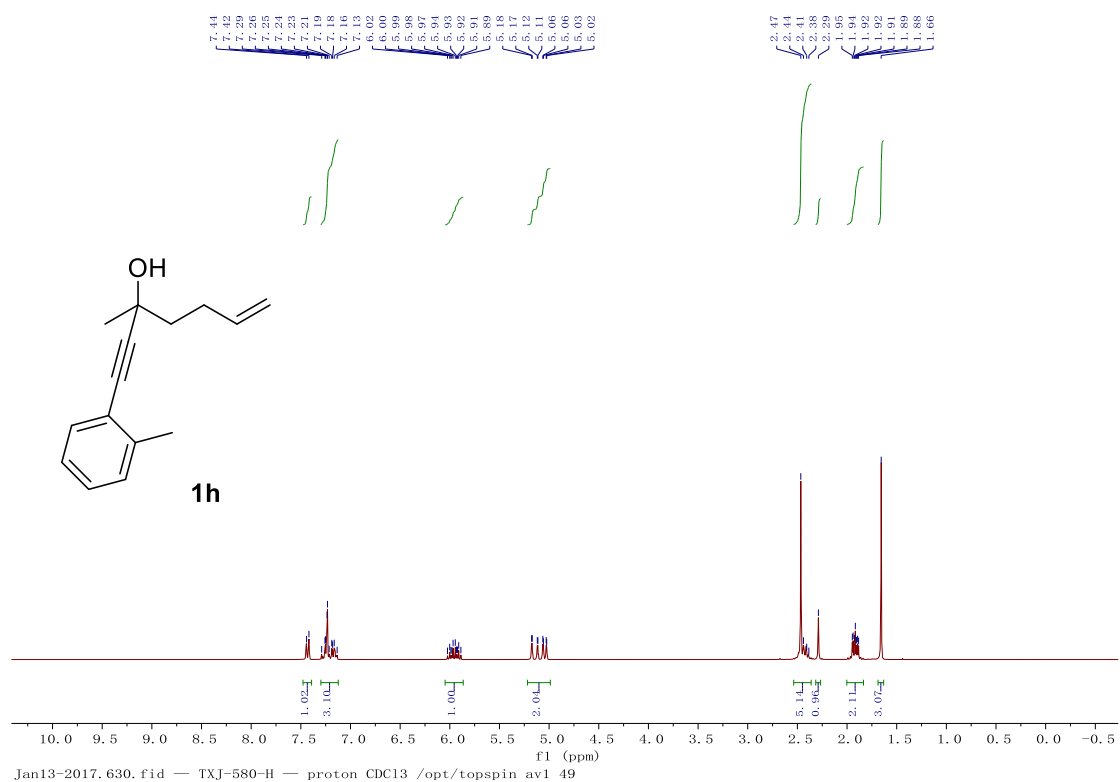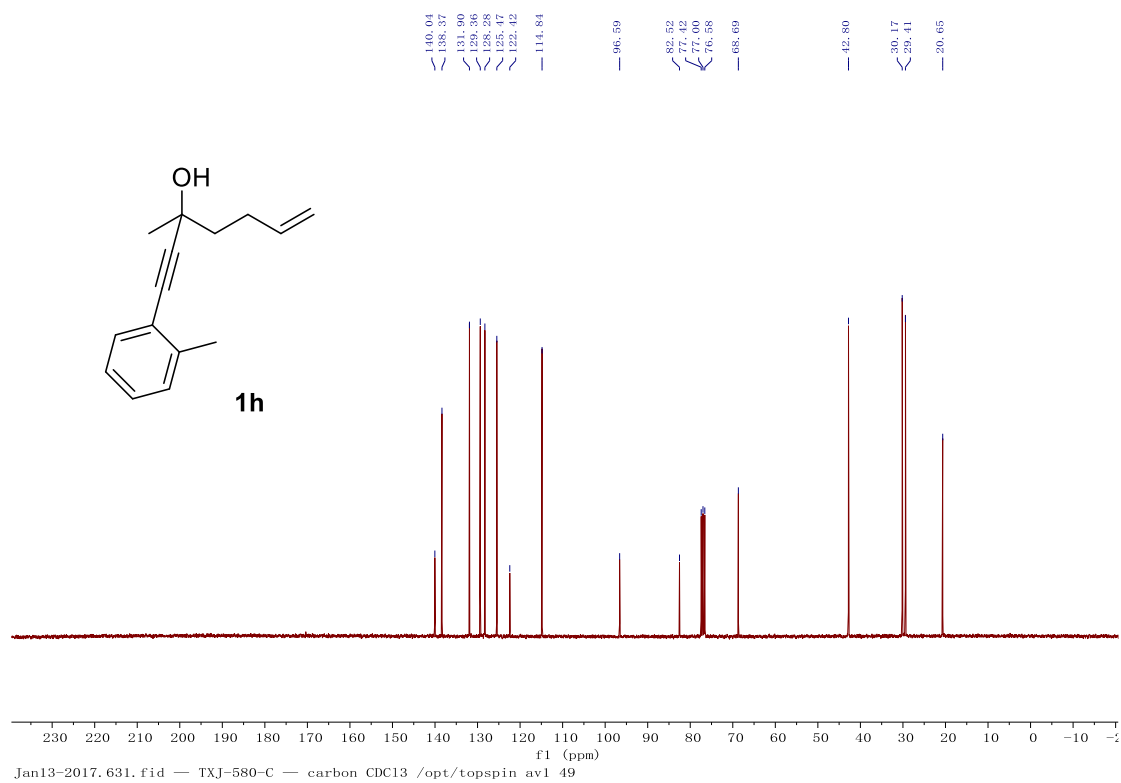

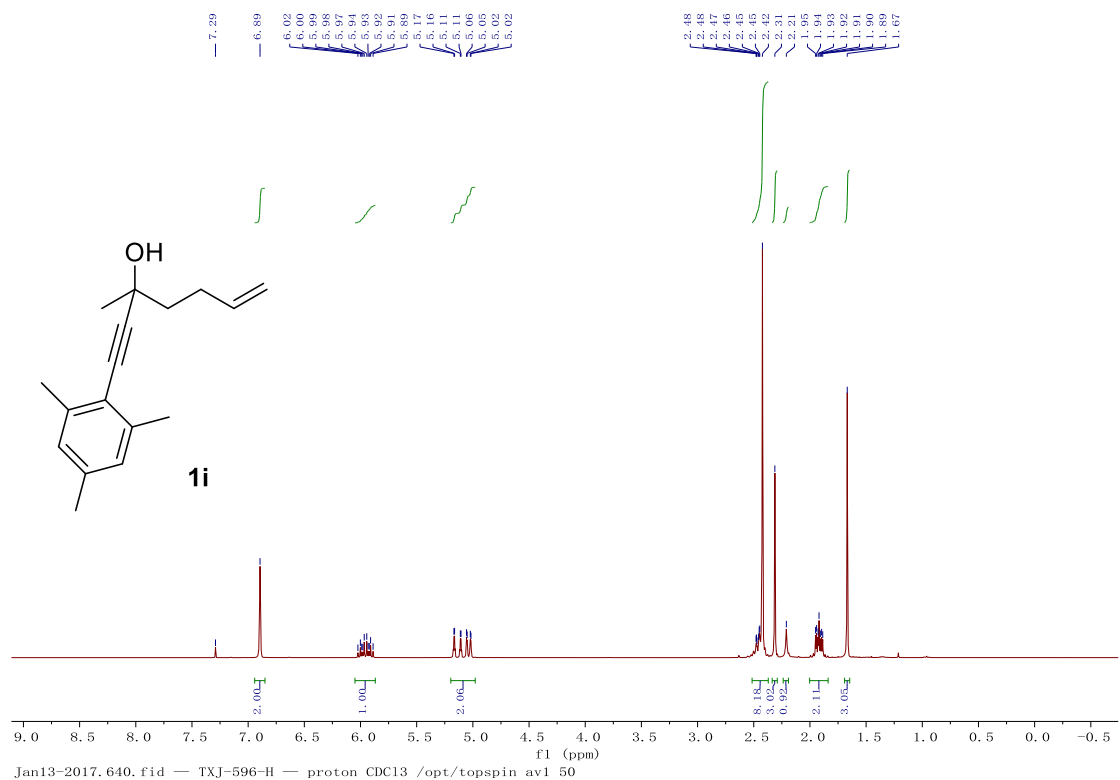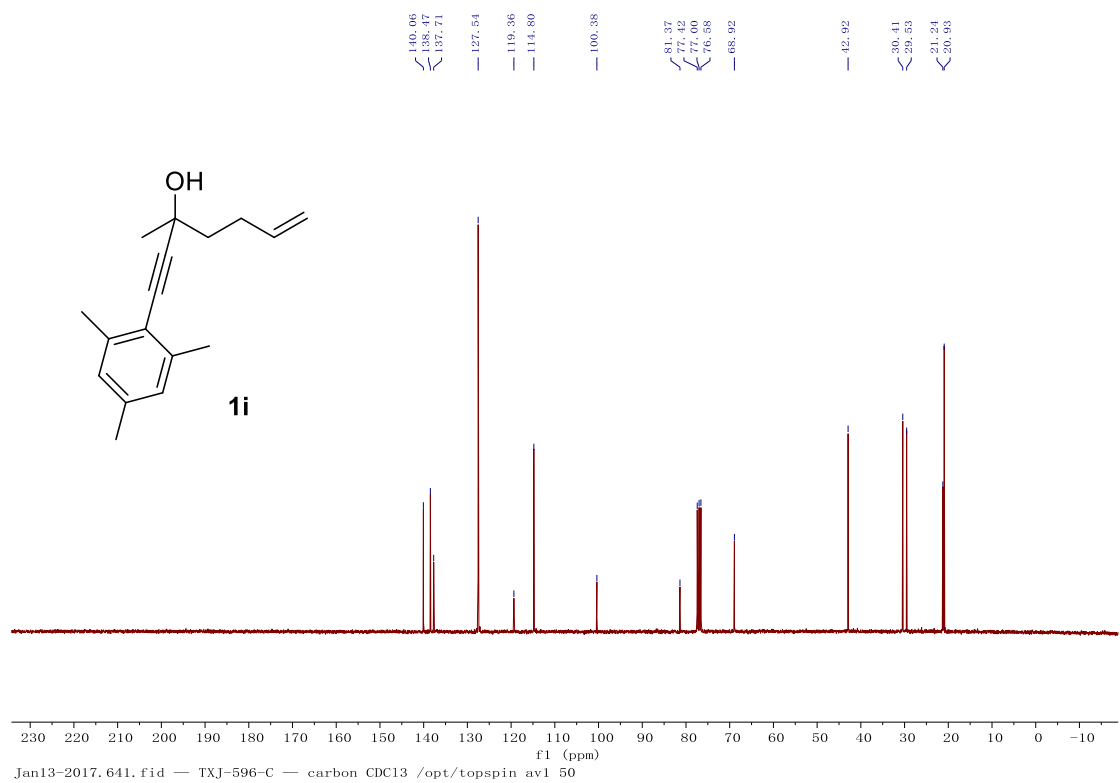

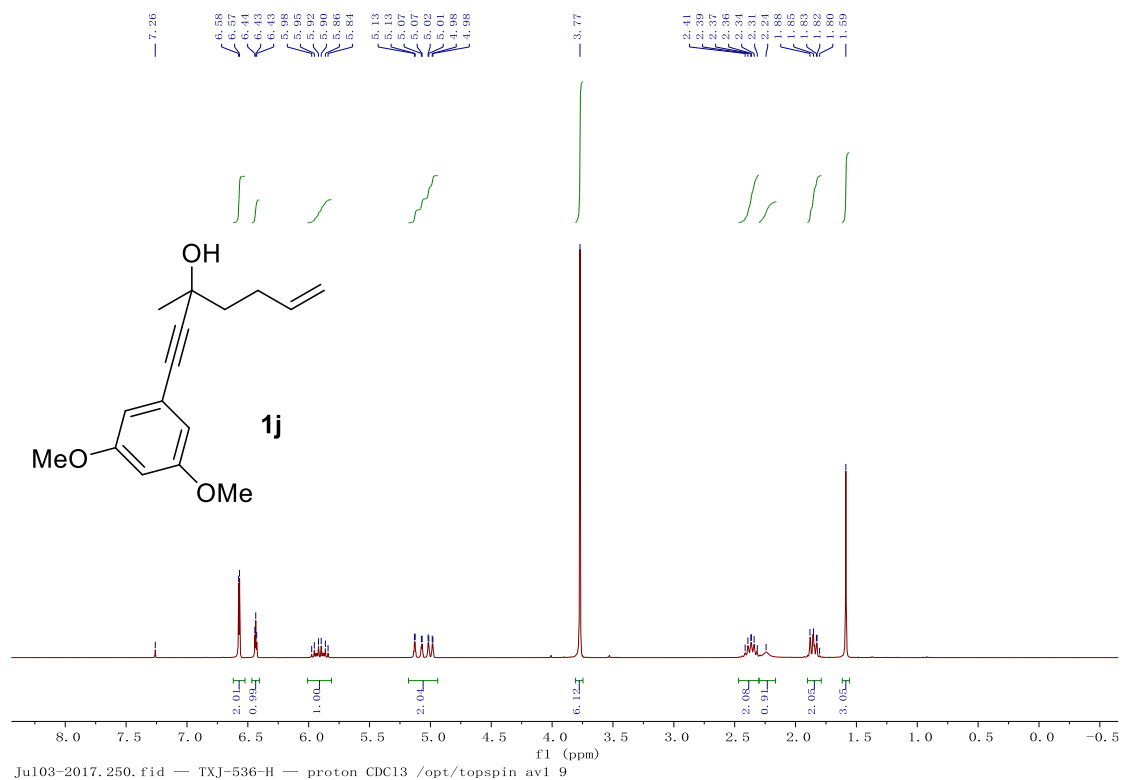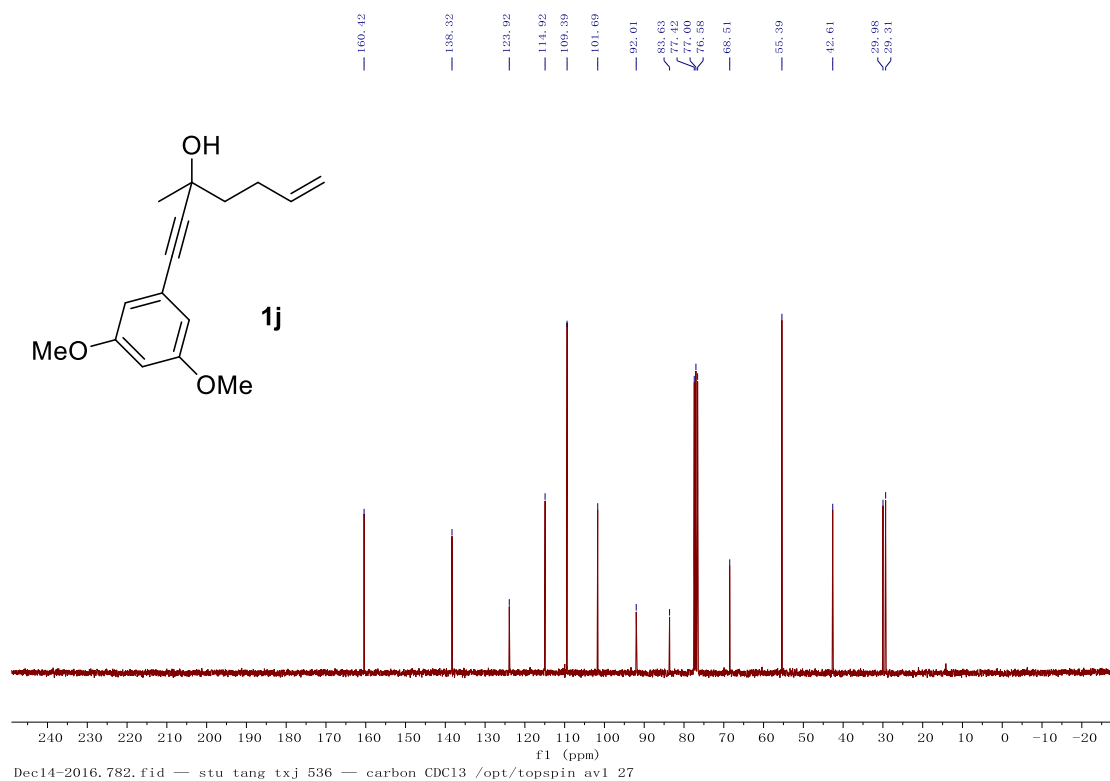





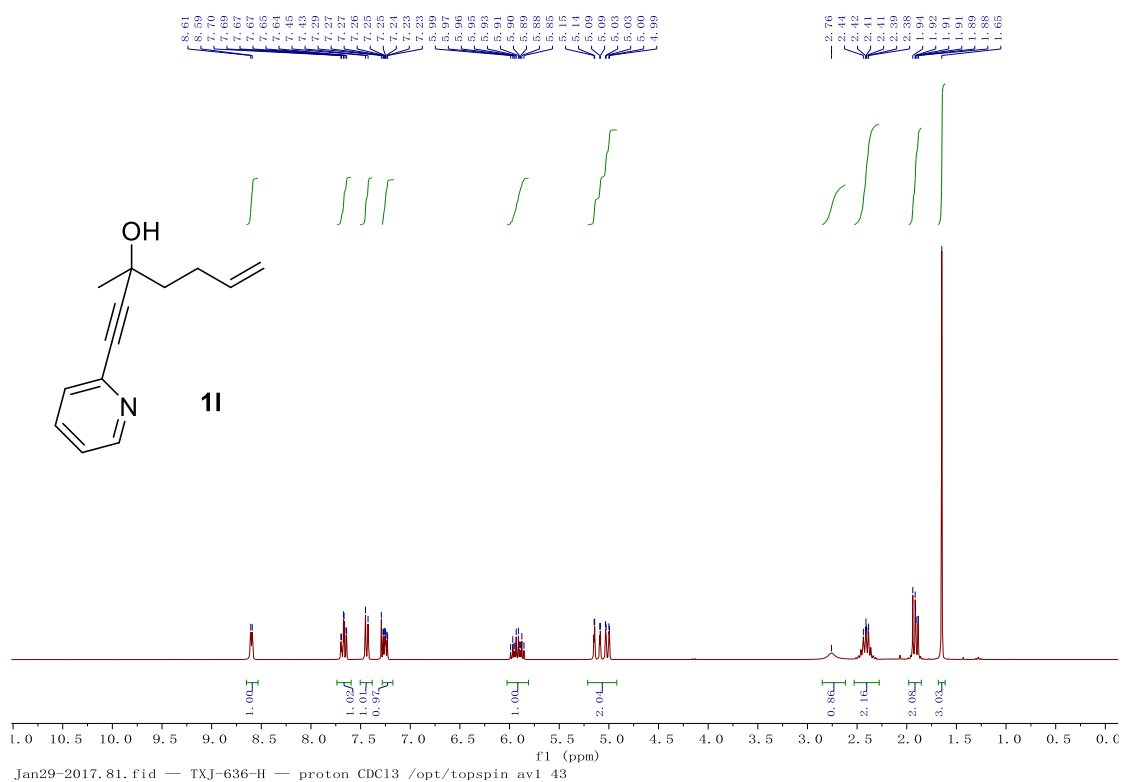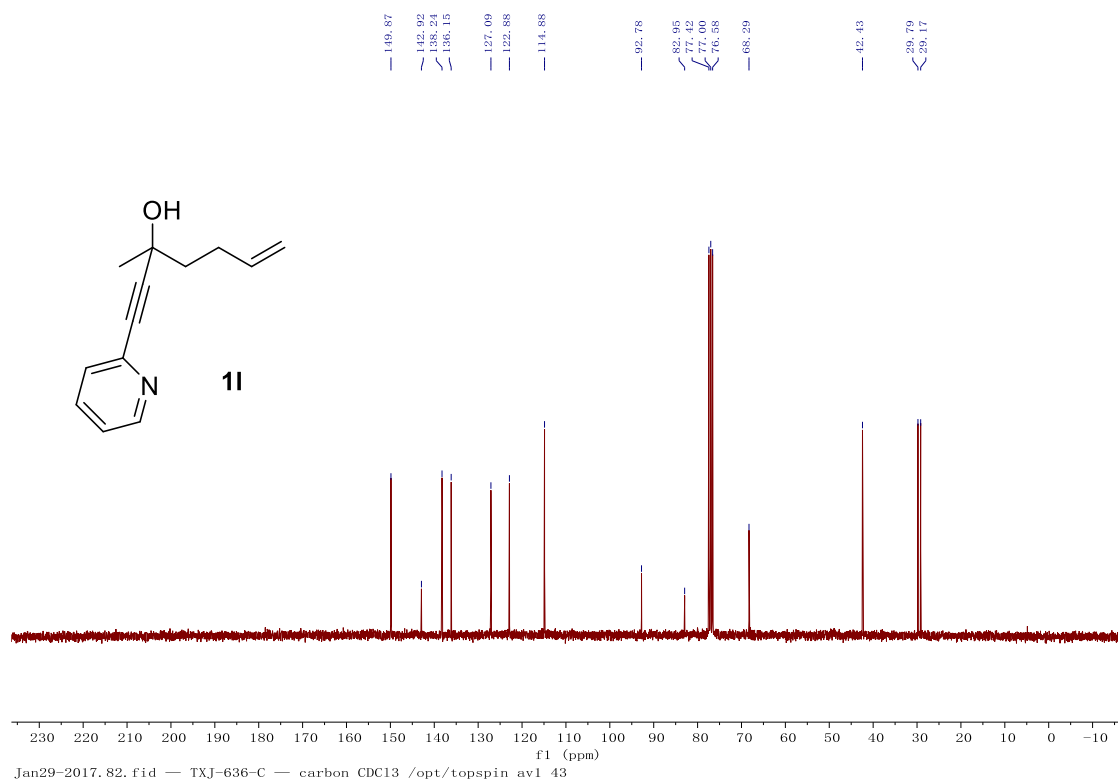

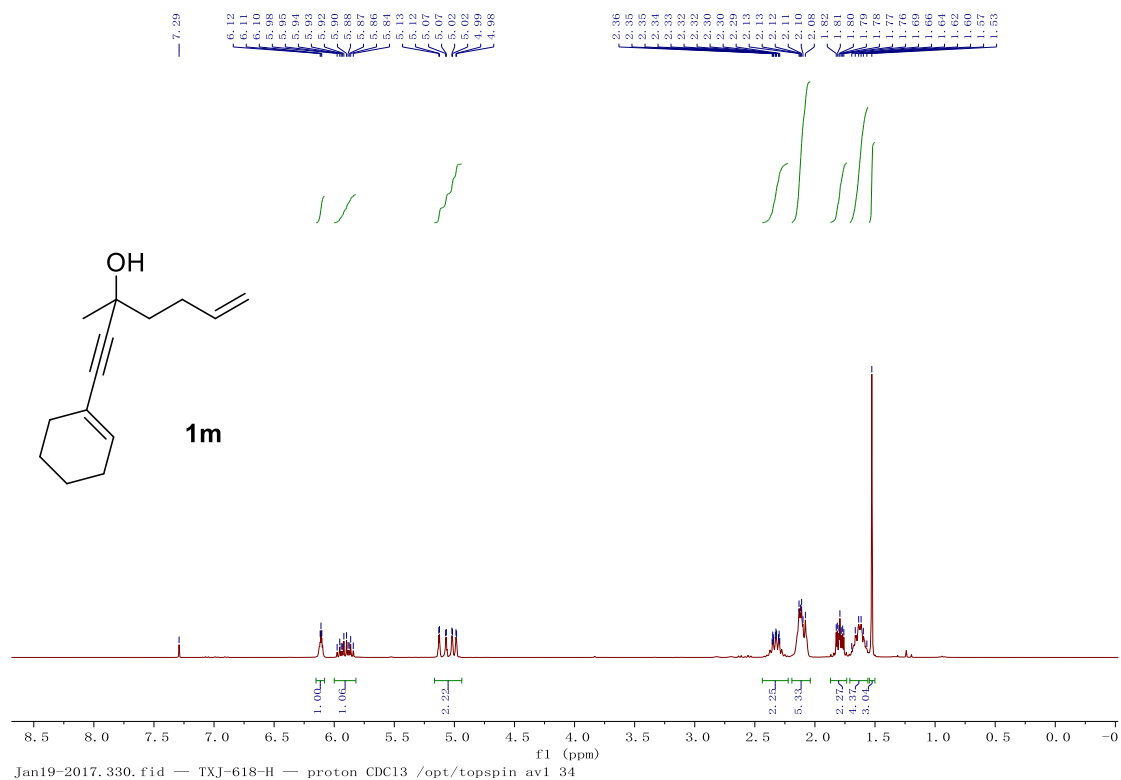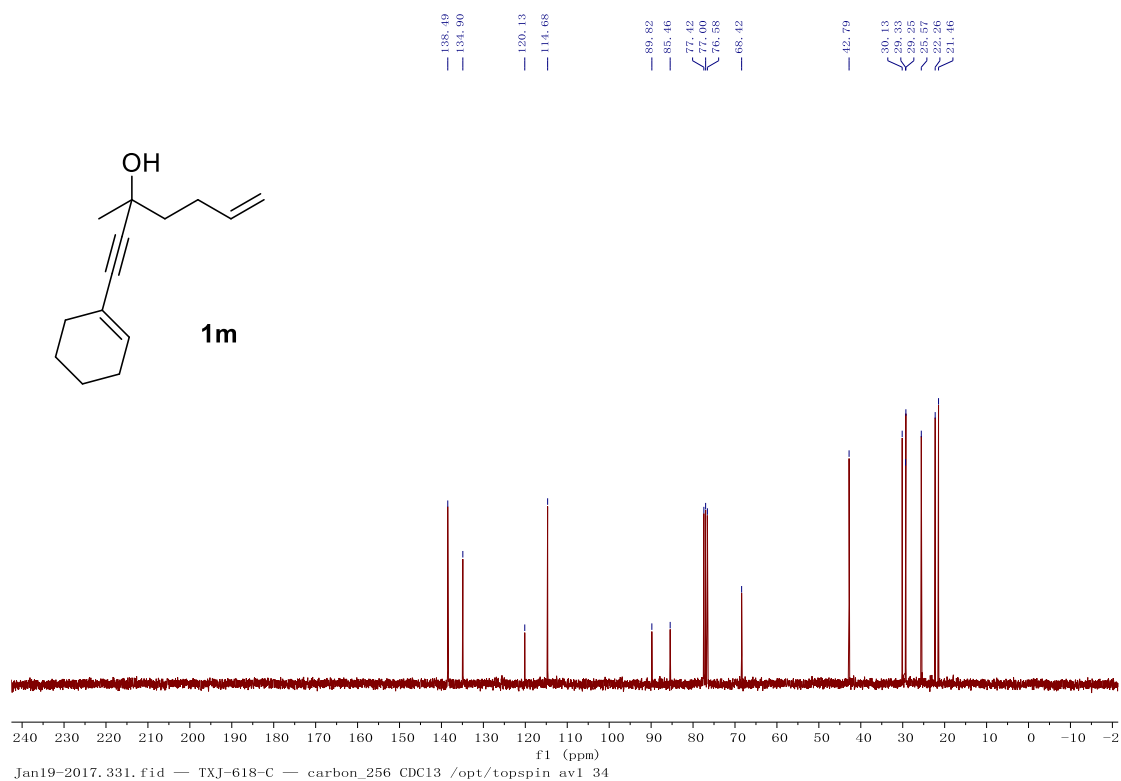

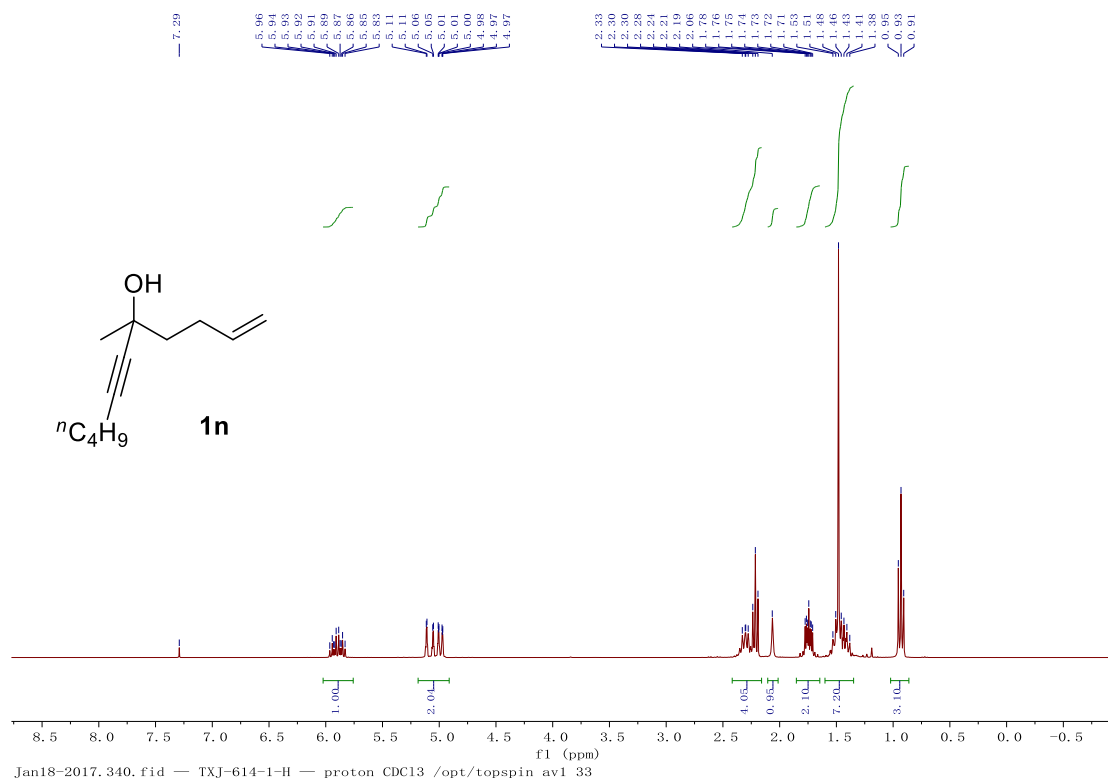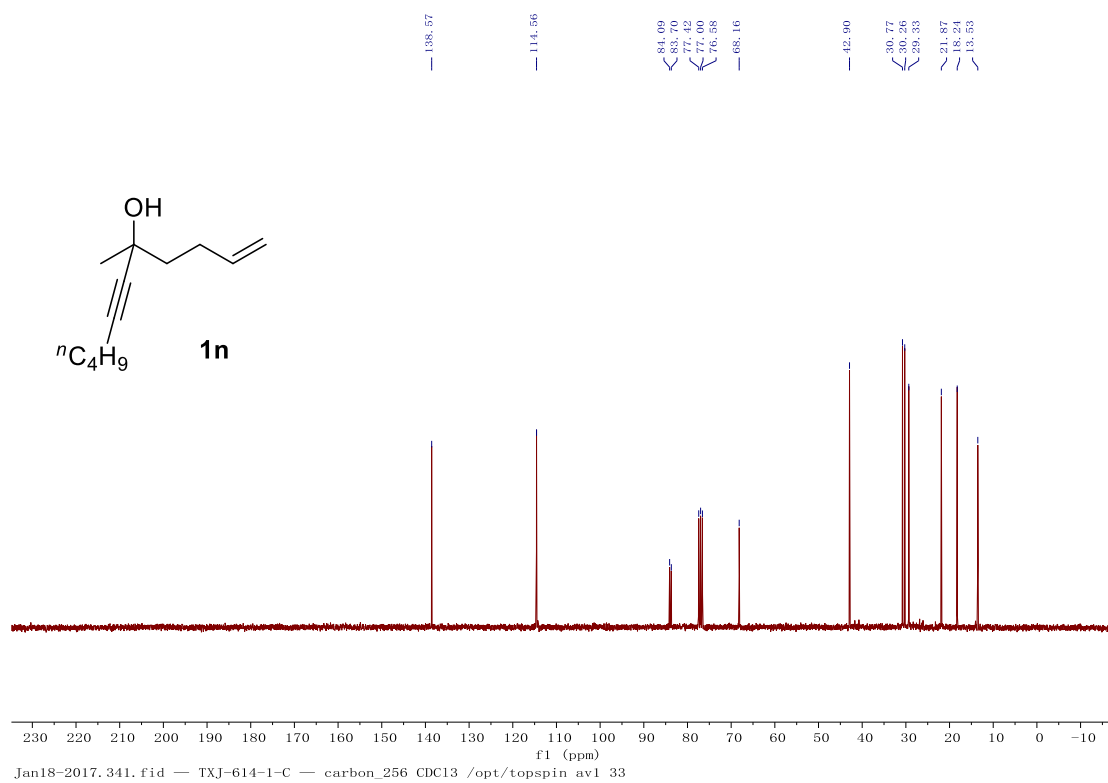

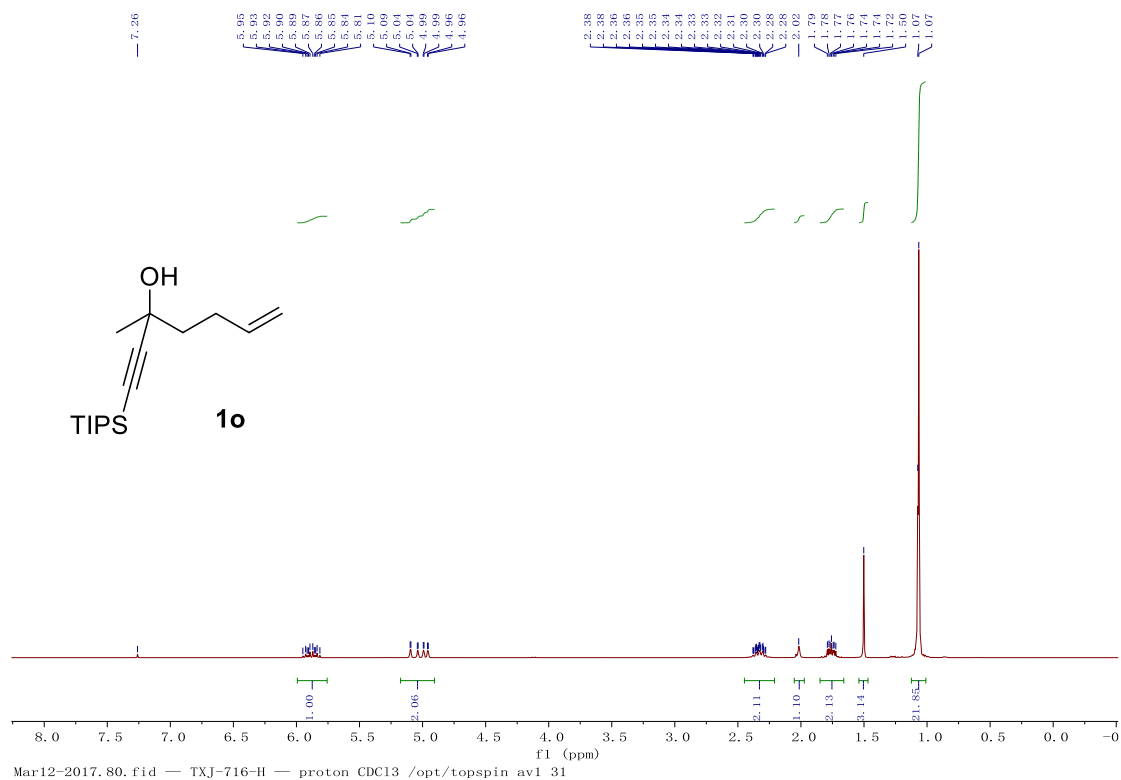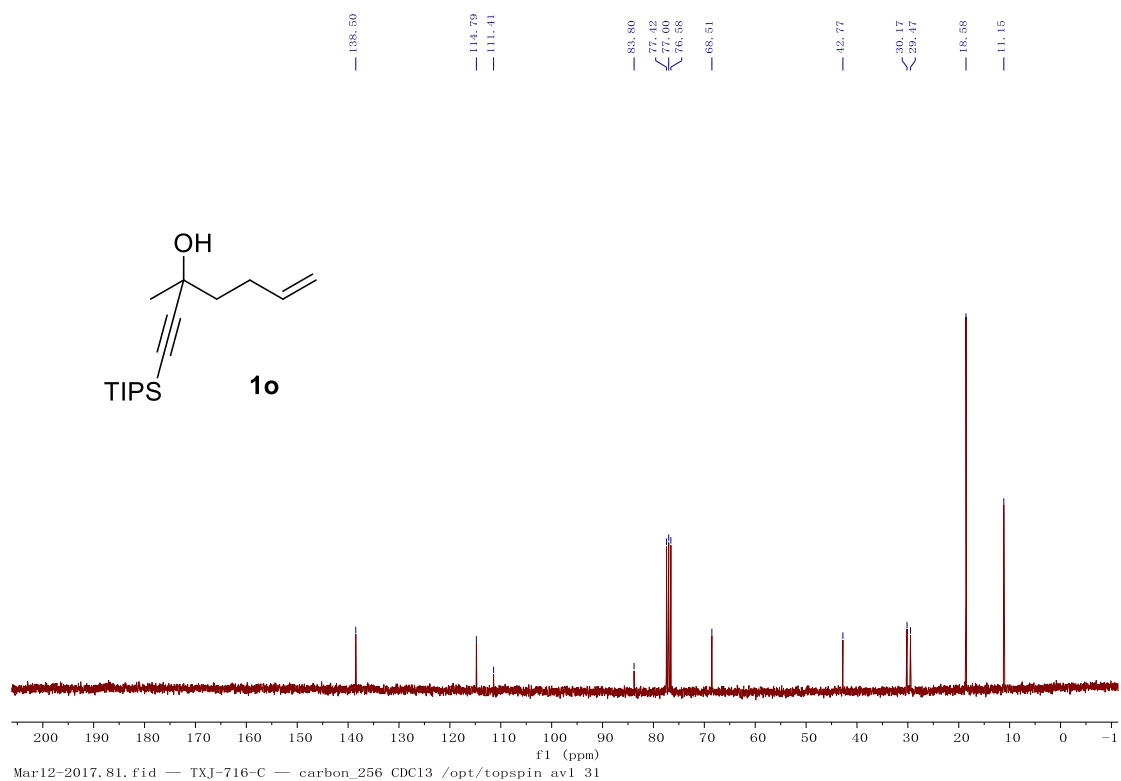

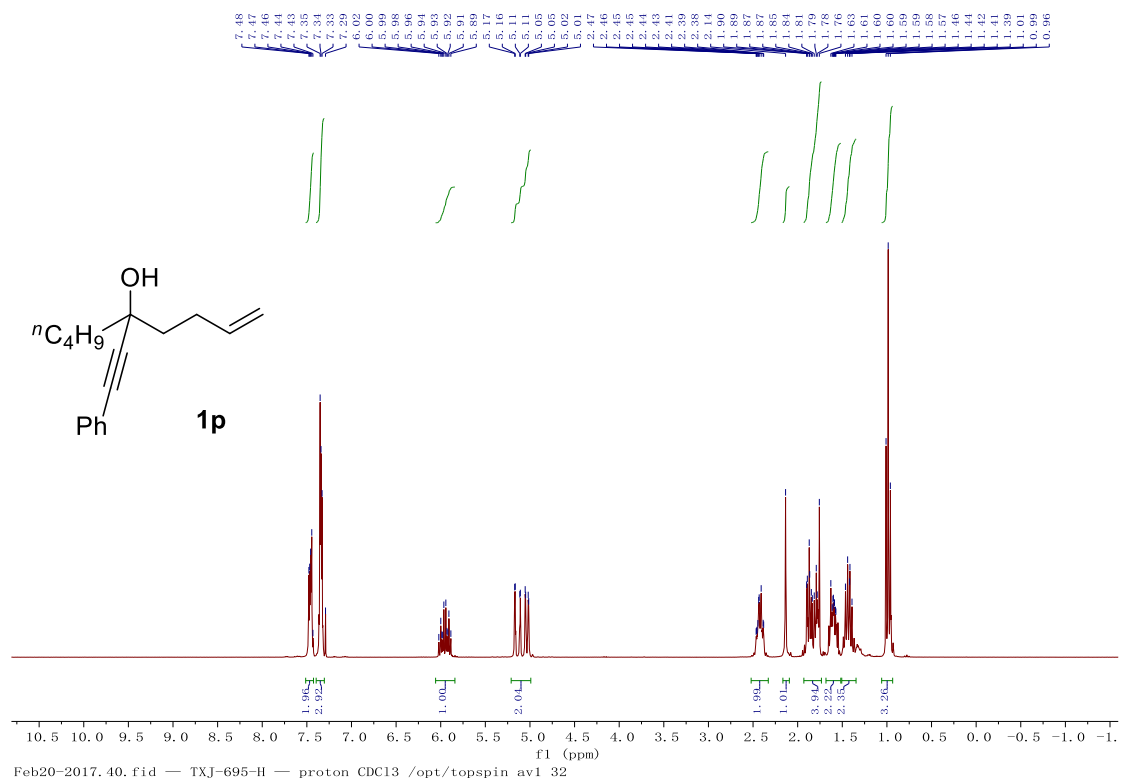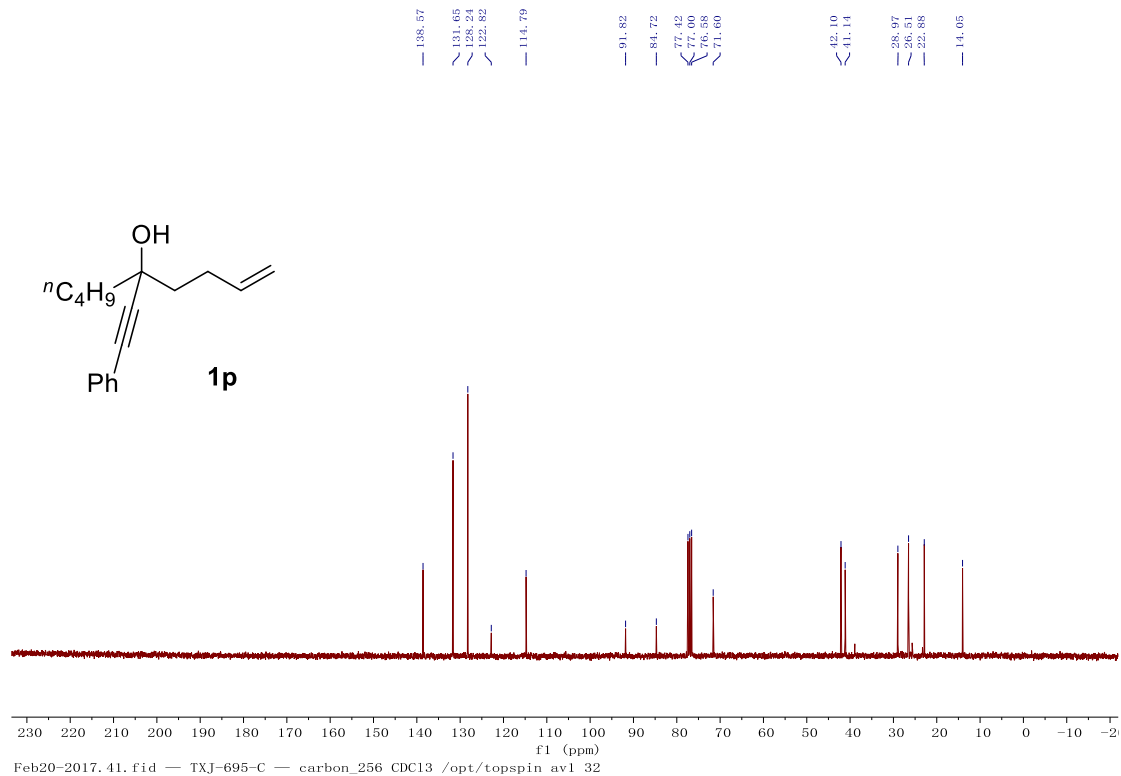

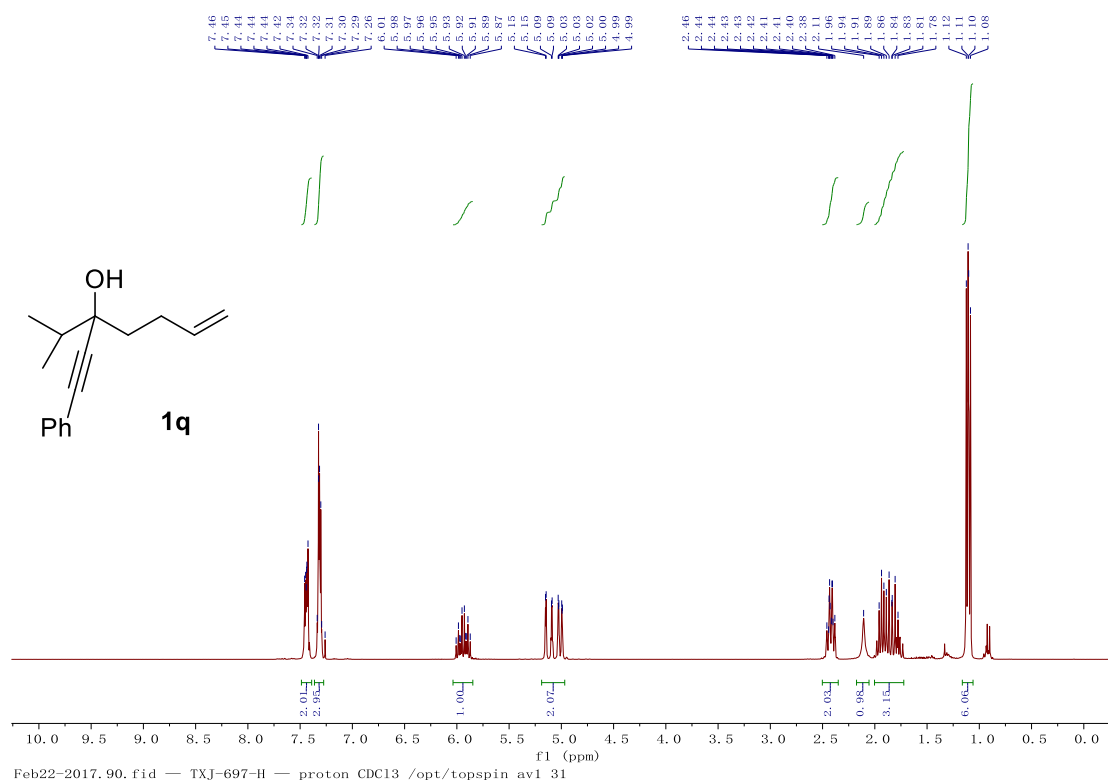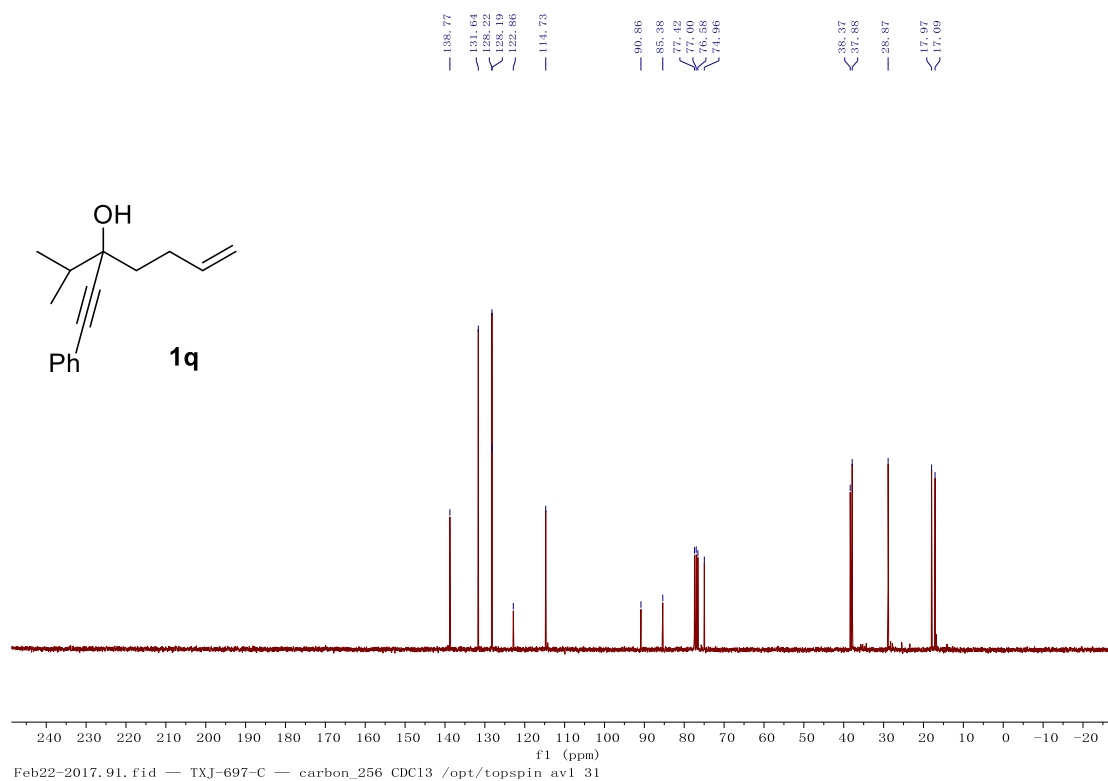

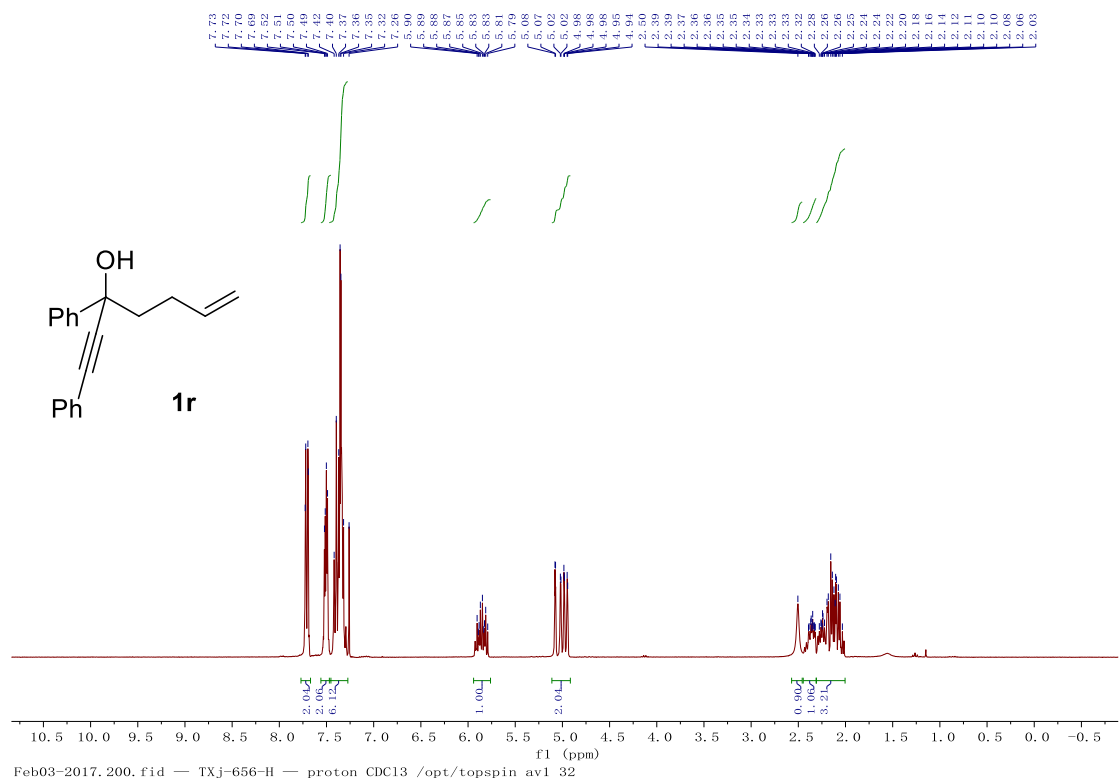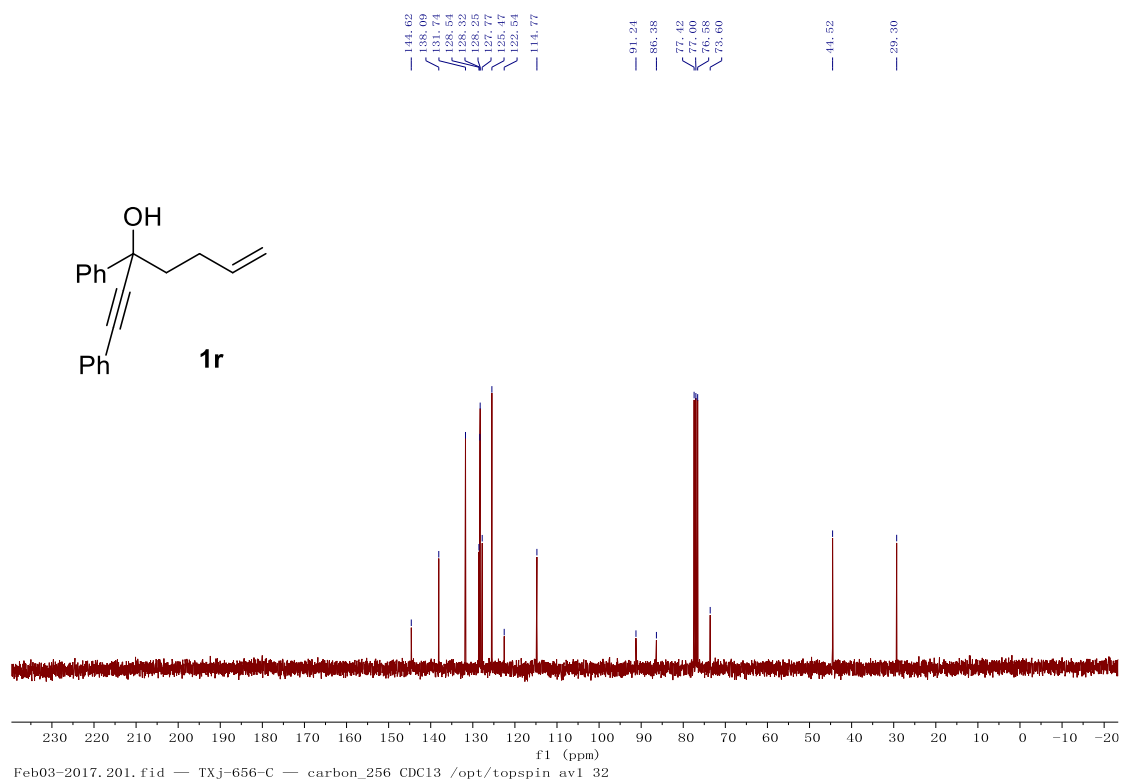

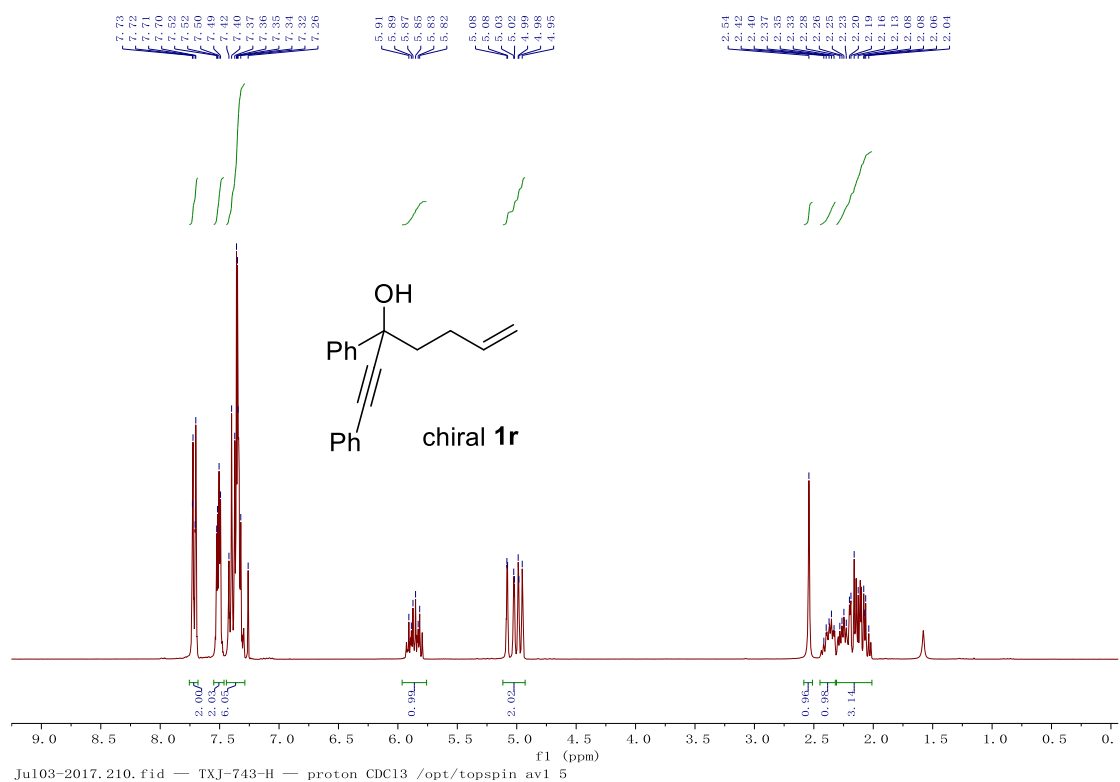



Data File C:\CHEM32\1\DATA\TANG\TXJ-656000001.D  
Sample Name: TXJ-656

```
=====
Acq. Operator   : kischkewitz
Acq. Instrument : Instrument 1                Location : Vial 1
Injection Date  : 11.05.2017 10:09:11
                                           Inj Volume : 15.0 µl

Acq. Method     : C:\CHEM32\1\METHODS\AK STUDER\STANDARD METHODS\M20_S.M
Last changed    : 04.04.2017 13:39:48 by prekel
Analysis Method : C:\CHEM32\1\METHODS\AK STUDER\STANDARD METHODS\M1_S.M
Last changed    : 11.05.2017 10:55:10 by kischkewitz
                  (modified after loading)
Method Info     : standard method M1_S, solvent system 90:10, time 60 min, flow 1 mL/min, 25
                  °C, 15 microL injection vol.

Sample Info     : OD-H
=====
```

```
=====
Instrument Conditions :      At Start          At Stop
Column Temp. (left)  :      25.0              25.0 °C
Column Temp. (right) :      25.0              25.0 °C
Pressure             :      132.9             134.6 bar
Flow                 :      1.000             1.000 ml/min
=====
```

```
Detector Lamp Burn Times: Current On-Time Accumulated On-Time
DAD 1, UV Lamp           :      0.27          3733.6 h
DAD 1, Visible Lamp      :      OFF           567.1 h
=====
```

```
Solvent Description :
PMP1 , Solvent A    : Cyclohexan
PMP1 , Solvent B    : Cyclohexan:Isoprop 90:10
=====
```

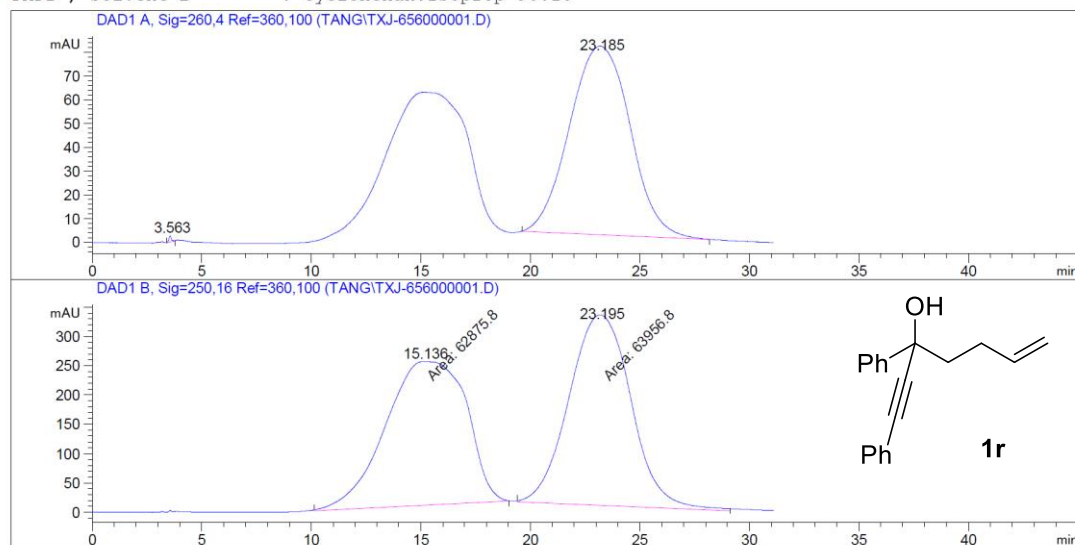

Signal 2: DAD1 B, Sig=250,16 Ref=360,100

| Peak # | RetTime [min] | Type | Width [min] | Area [mAU*s] | Height [mAU] | Area %  |
|--------|---------------|------|-------------|--------------|--------------|---------|
| 1      | 15.136        | MM   | 4.2695      | 6.28758e4    | 245.44820    | 49.5738 |
| 2      | 23.195        | MM   | 3.2754      | 6.39568e4    | 325.44220    | 50.4262 |

Totals : 1.26833e5 570.89040

Data File C:\CHEM32\1\DATA\TANG\TXJ-743000001.D  
Sample Name: TXJ-743

```

=====
Acq. Operator   : kischkewitz
Acq. Instrument : Instrument 1                      Location : Vial 2
Injection Date  : 11.05.2017 10:56:21              Inj Volume : 15.0 µl

Acq. Method     : C:\CHEM32\1\METHODS\AK STUDER\STANDARD METHODS\M20_S.M
Last changed    : 11.05.2017 10:40:42 by kischkewitz
Analysis Method : C:\CHEM32\1\METHODS\AK STUDER\STANDARD METHODS\M1_S.M
Last changed    : 11.05.2017 12:56:08 by kischkewitz
                  (modified after loading)
Method Info     : standard method M1_S, solvent system 90:10, time 60 min, flow 1 mL/min, 25
                  °C, 15 microL injection vol.

Sample Info     : OD-H
  
```

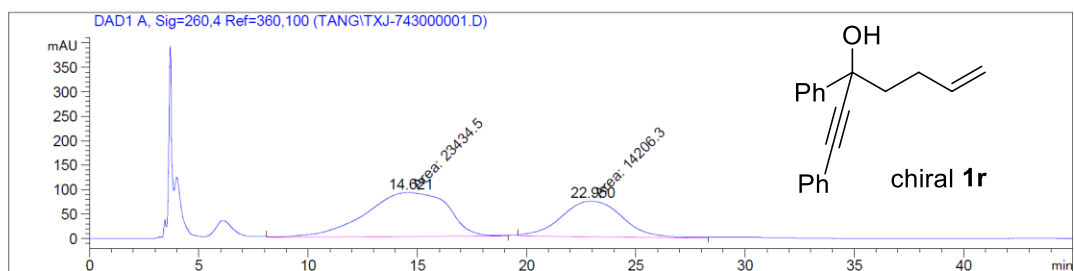

Signal 1: DAD1 A, Sig=260,4 Ref=360,100

| Peak # | RetTime [min] | Type | Width [min] | Area [mAU*s] | Height [mAU] | Area %  |
|--------|---------------|------|-------------|--------------|--------------|---------|
| 1      | 14.621        | MM   | 4.3488      | 2.34345e4    | 89.81277     | 62.2583 |
| 2      | 22.950        | MM   | 3.2419      | 1.42063e4    | 73.03435     | 37.7417 |

Totals : 3.76407e4 162.84712

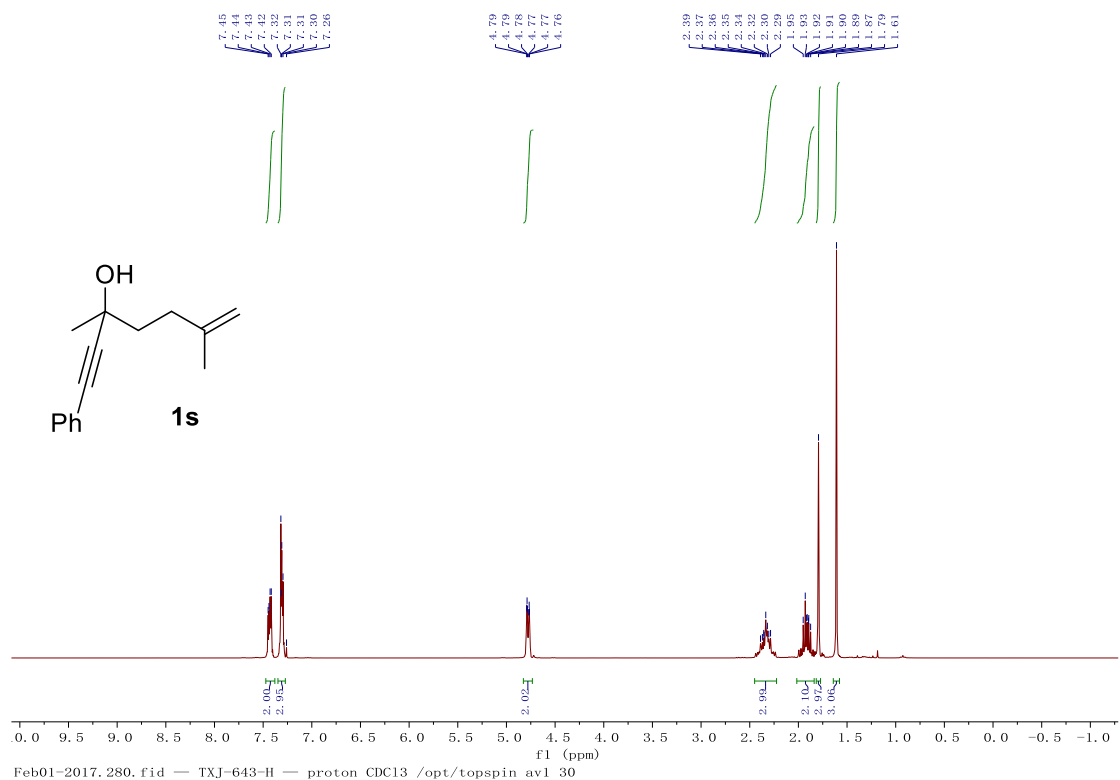

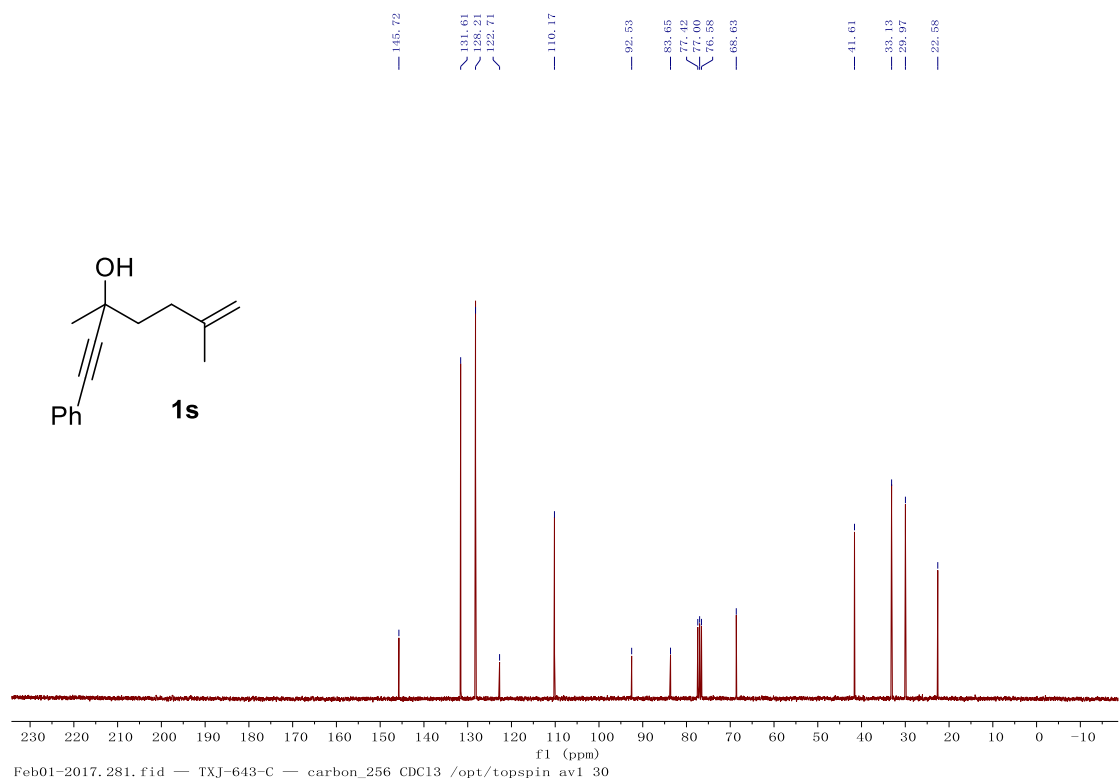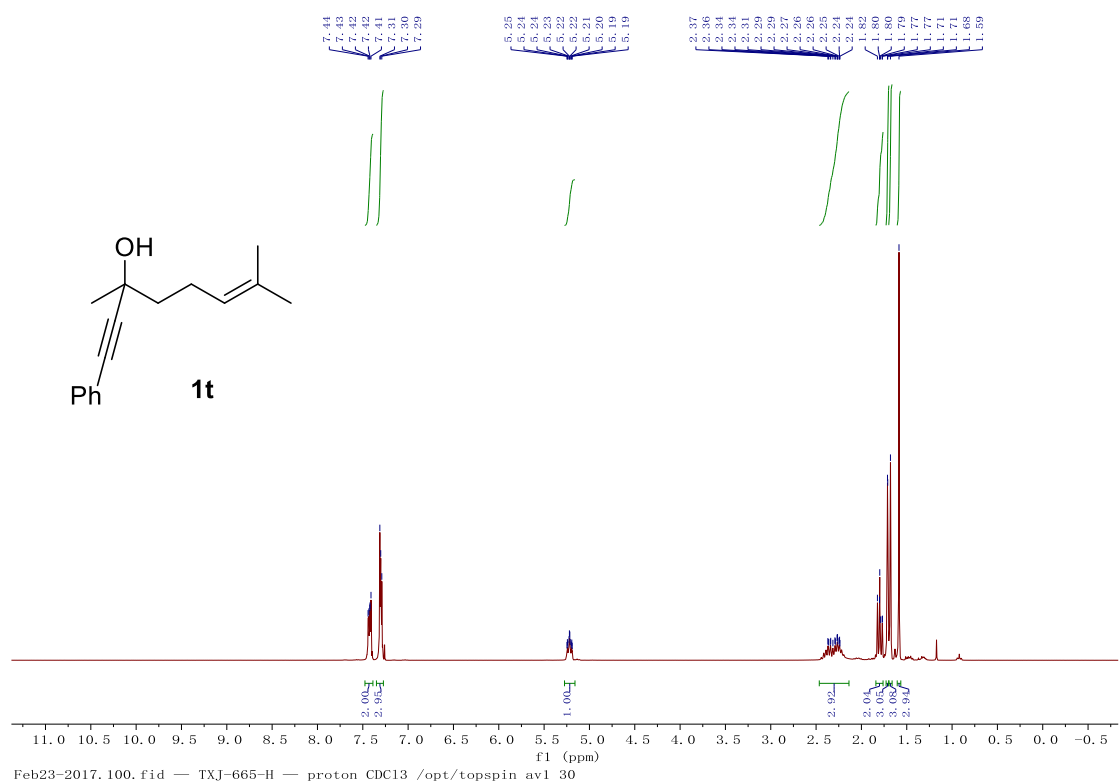

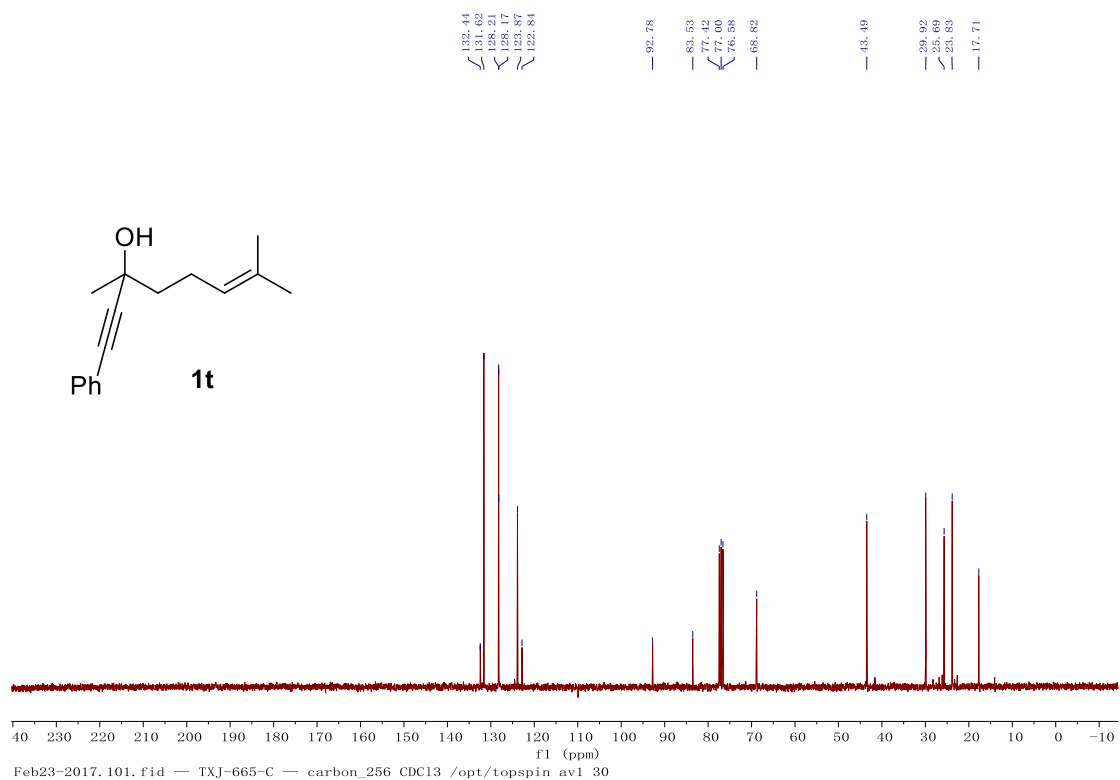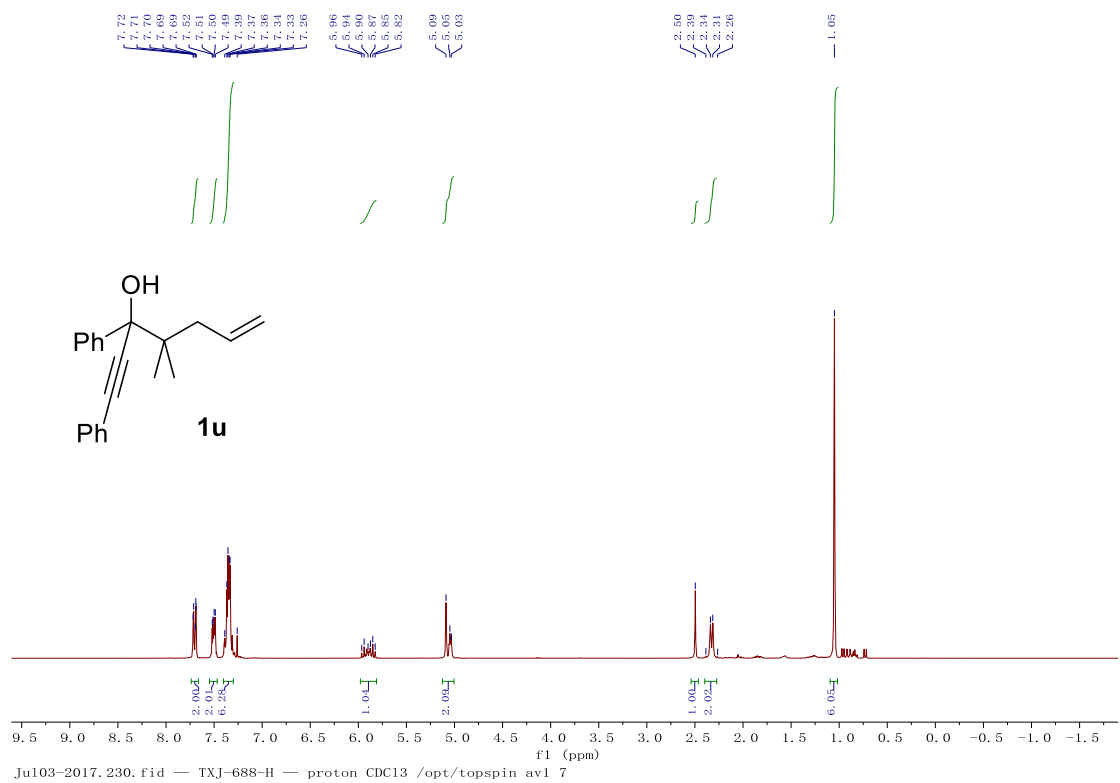

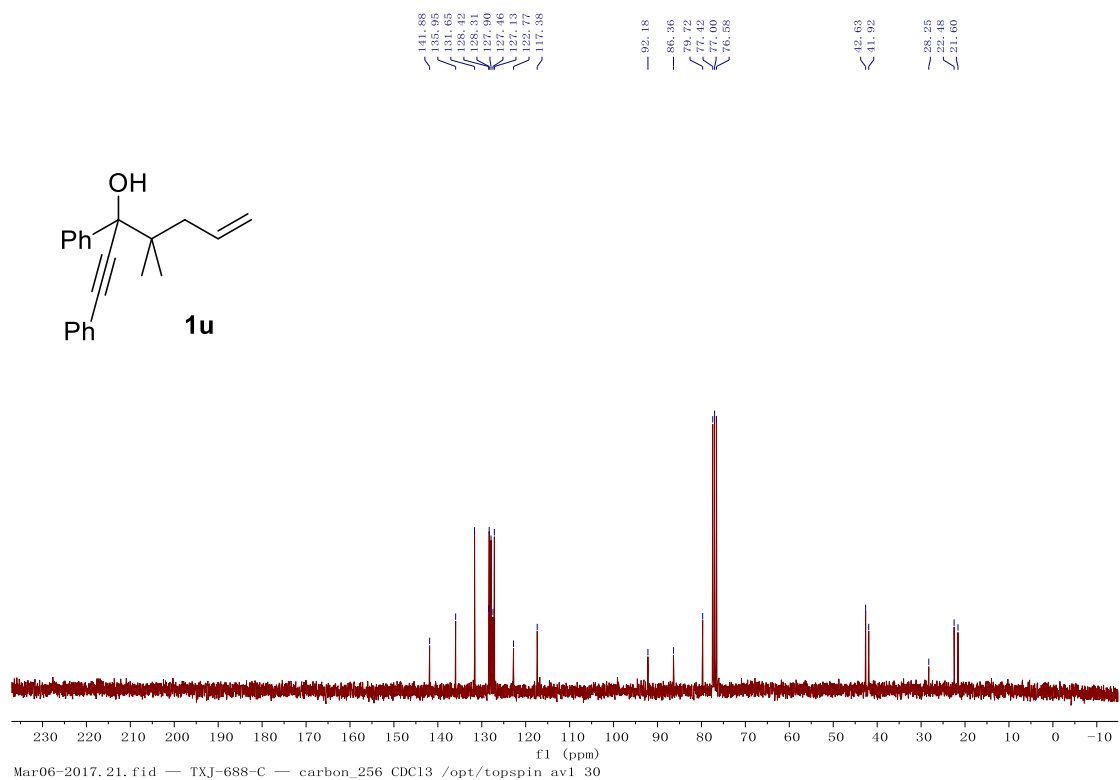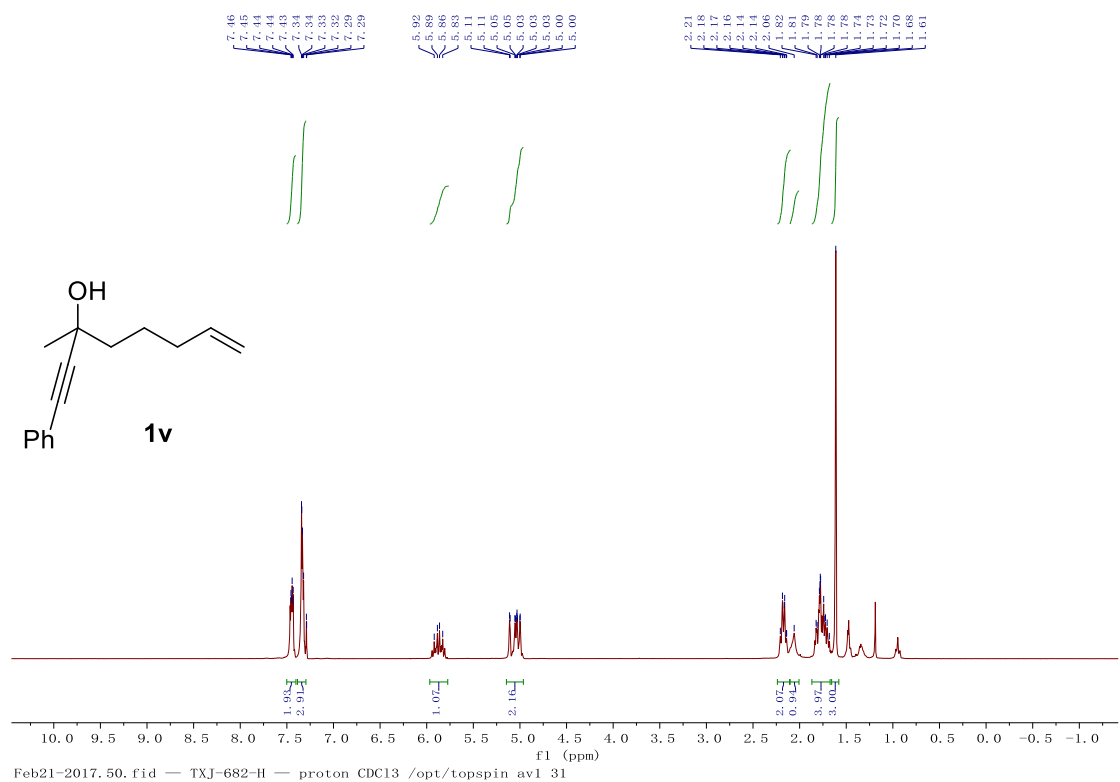

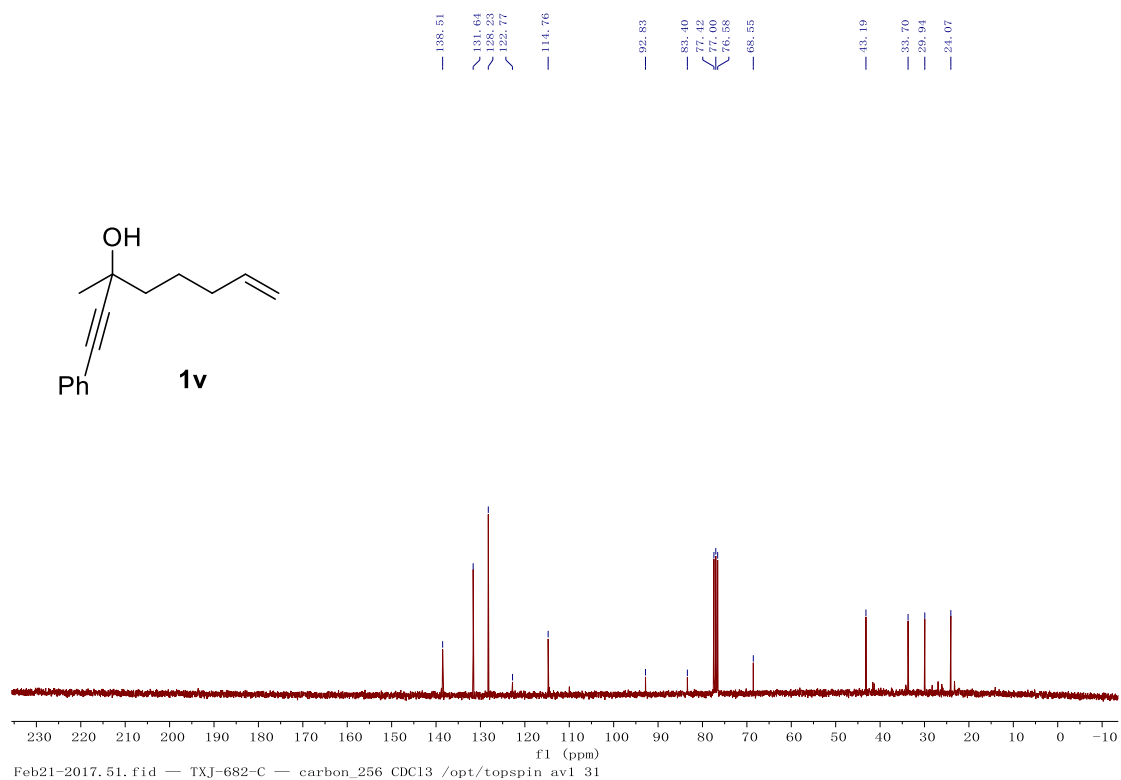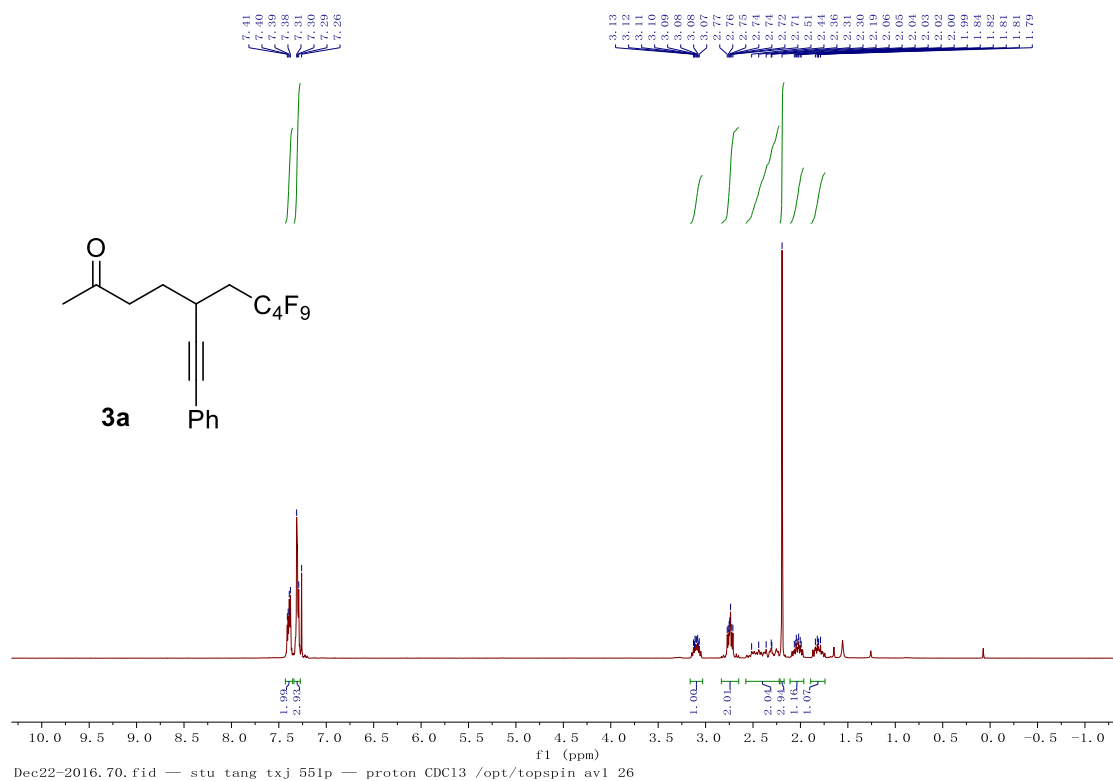

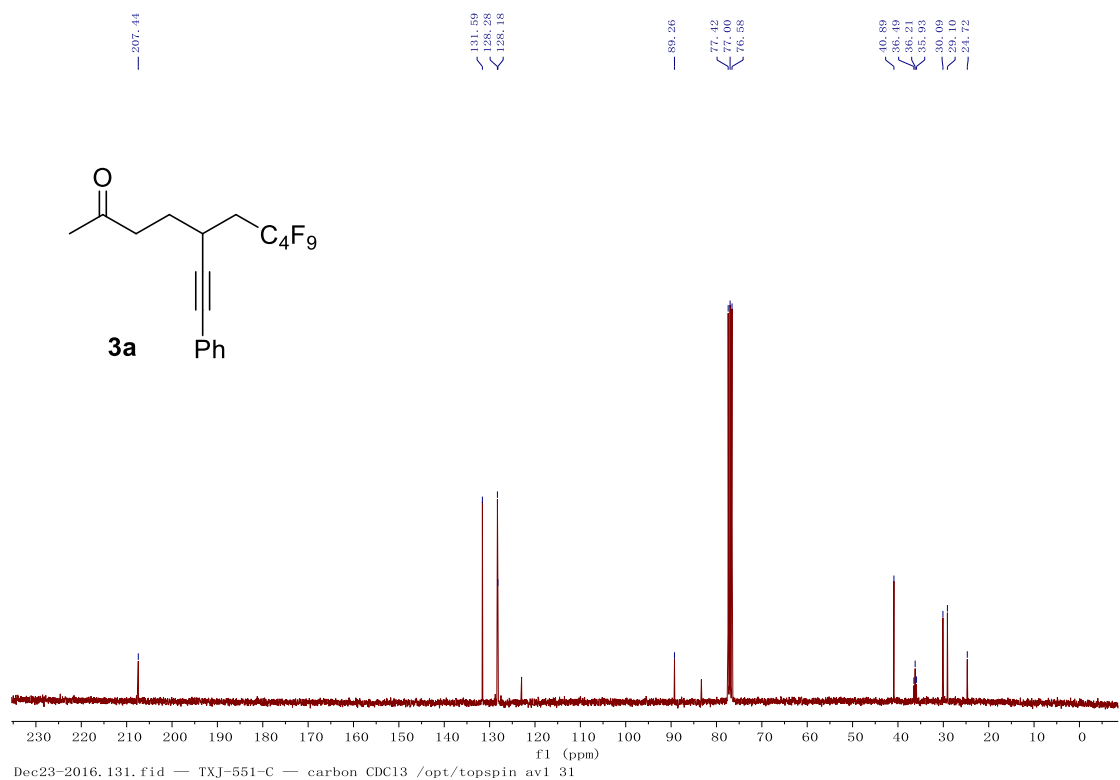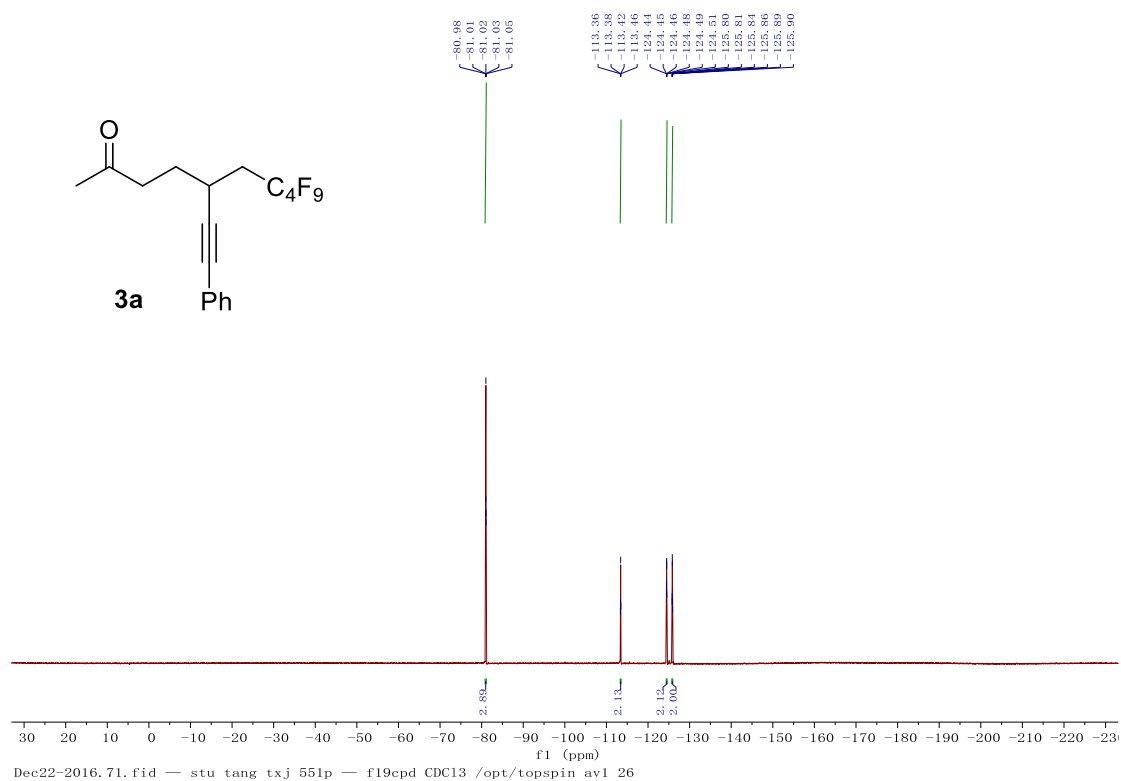

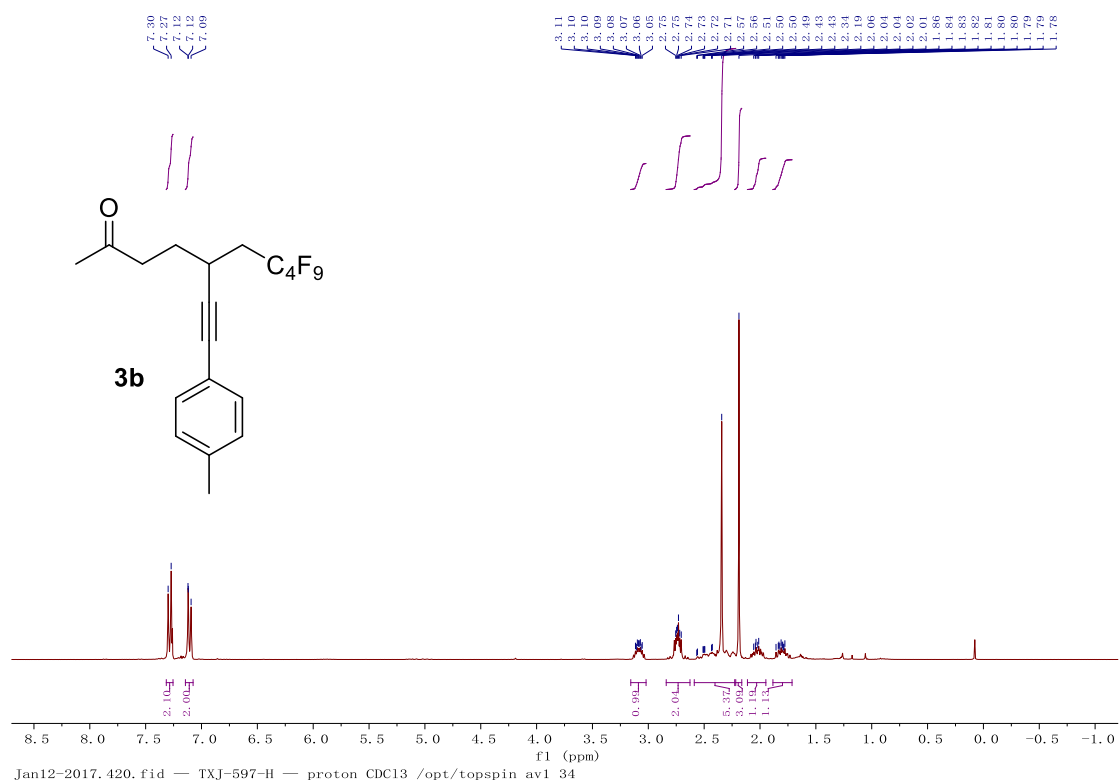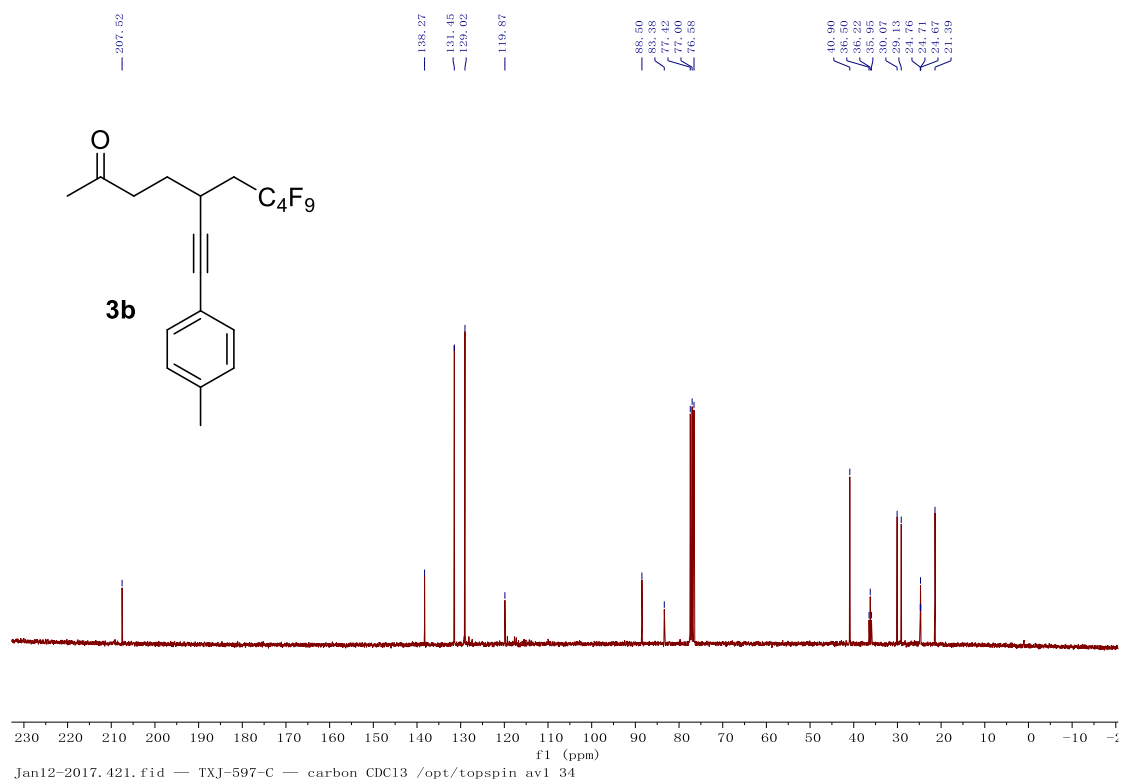



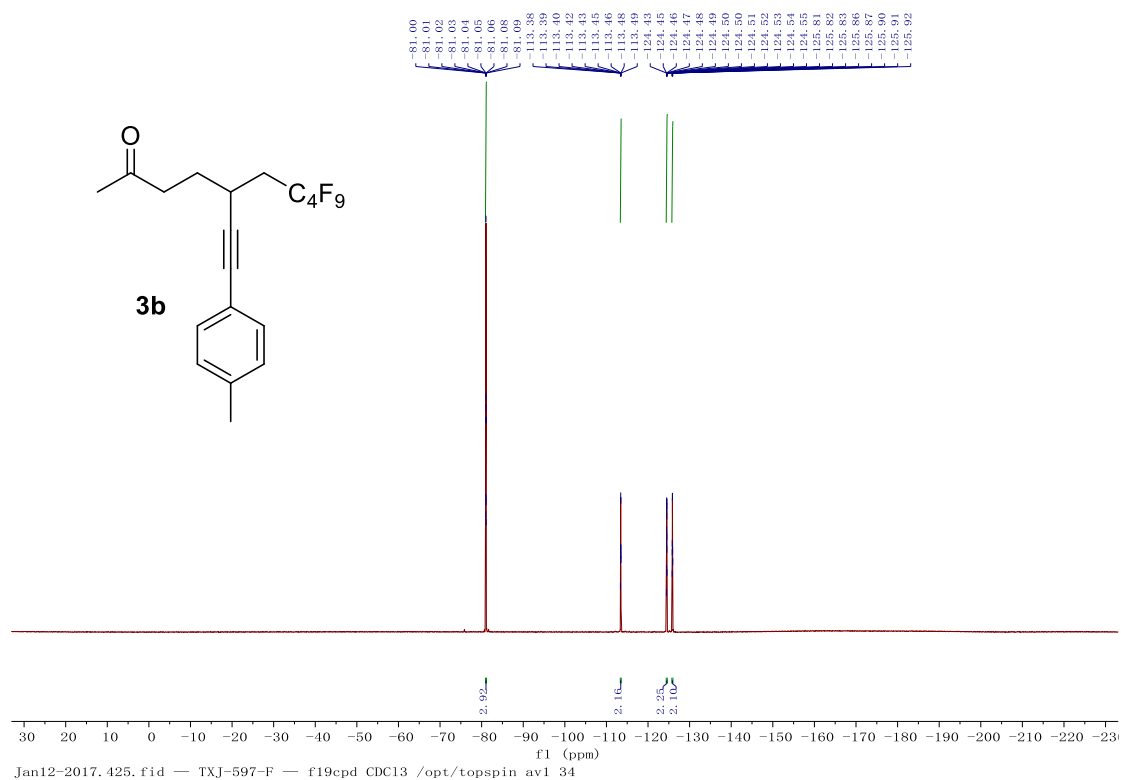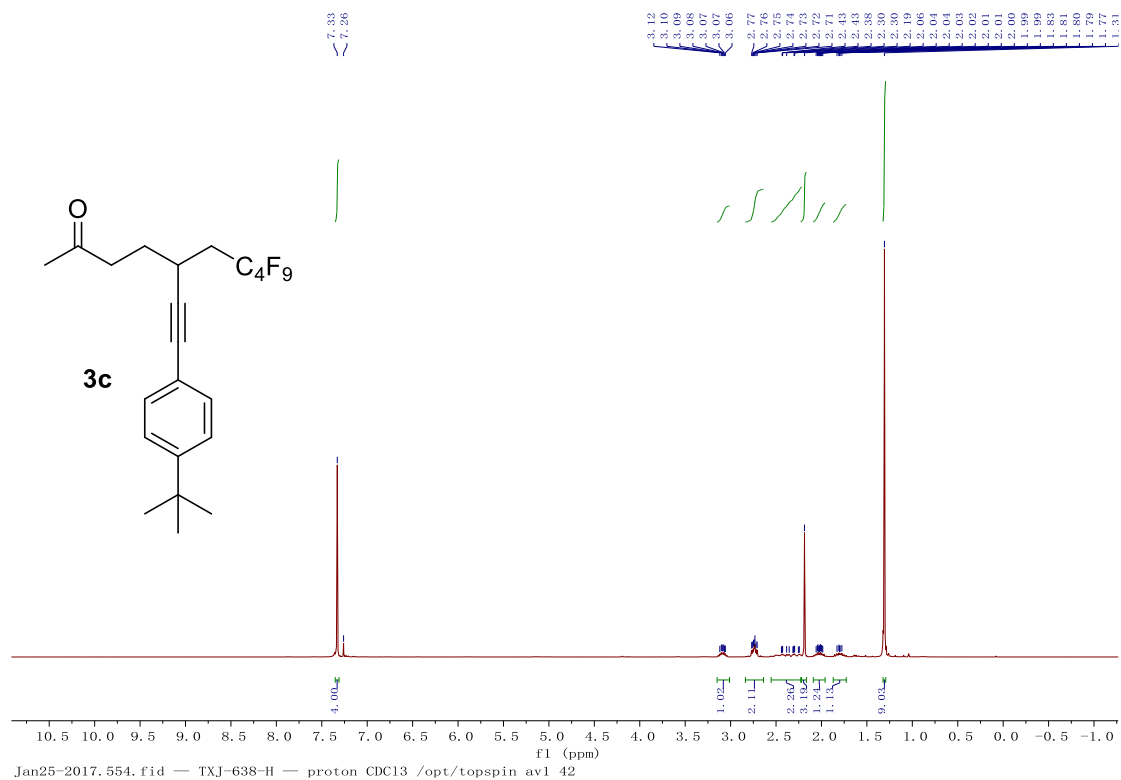



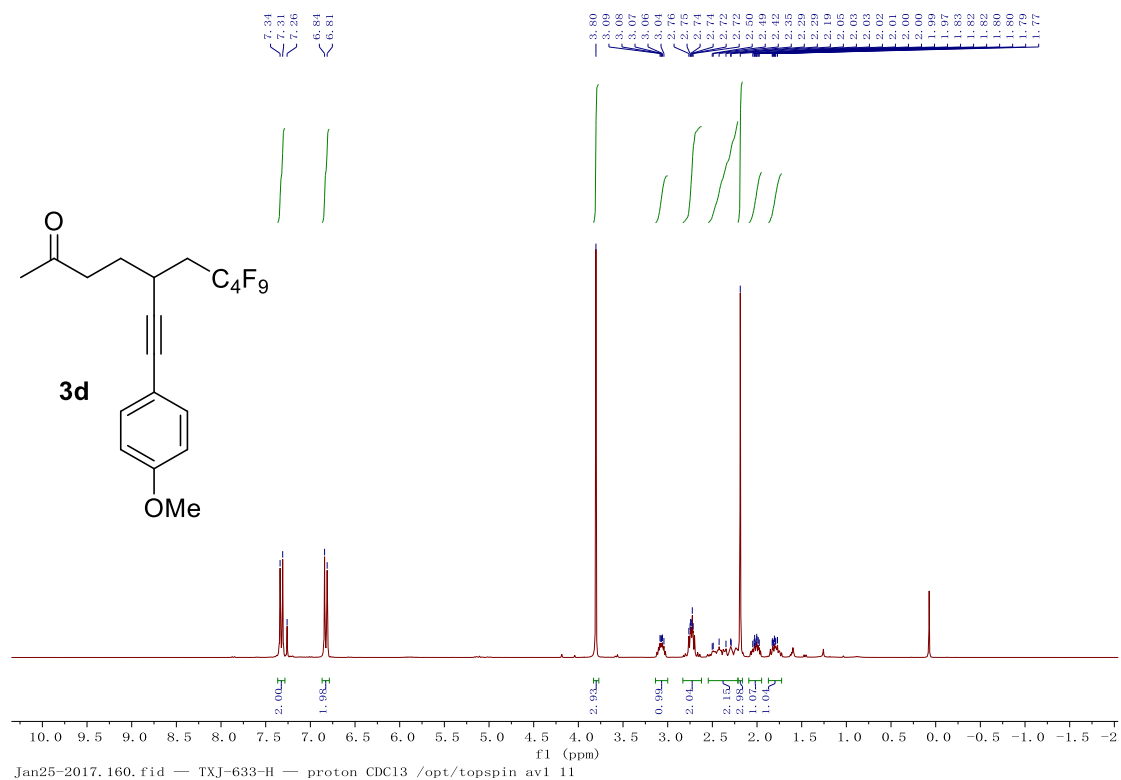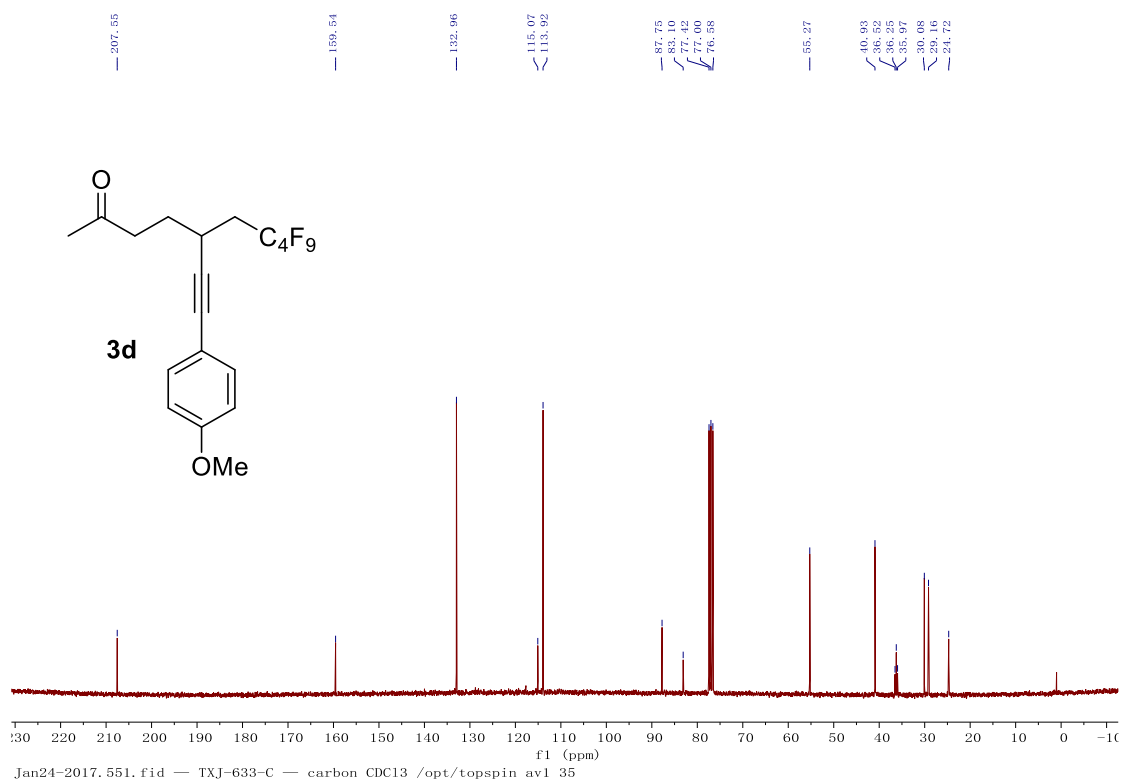

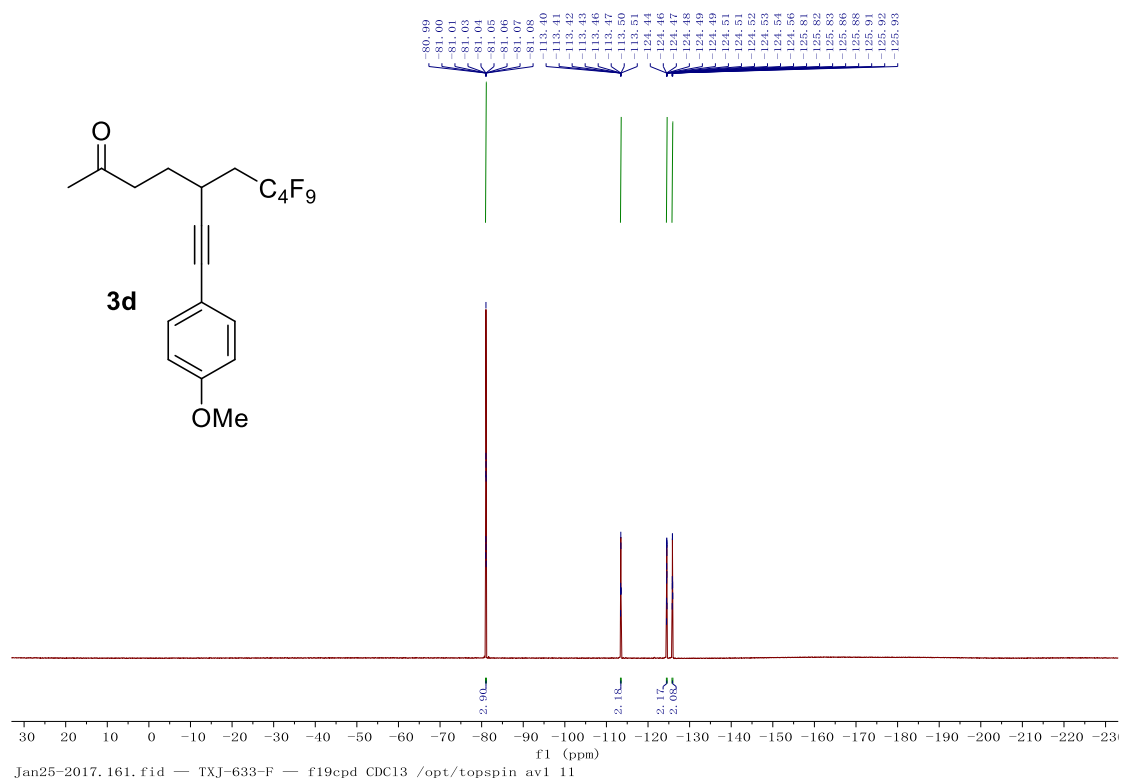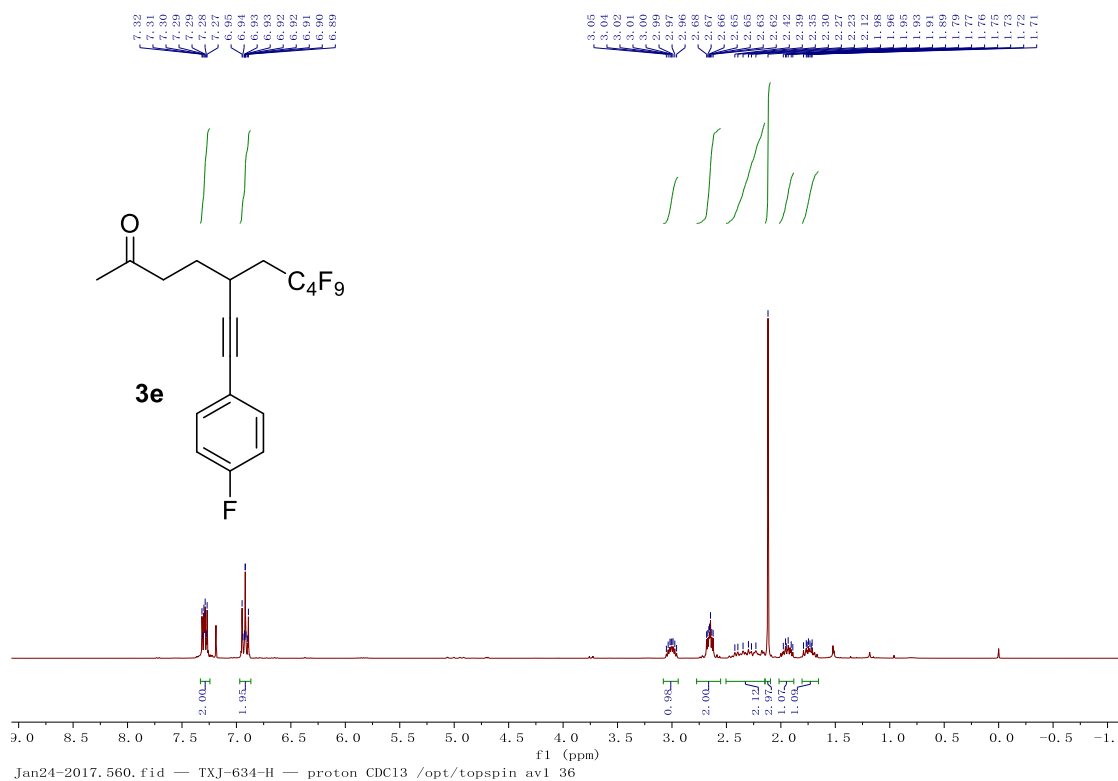

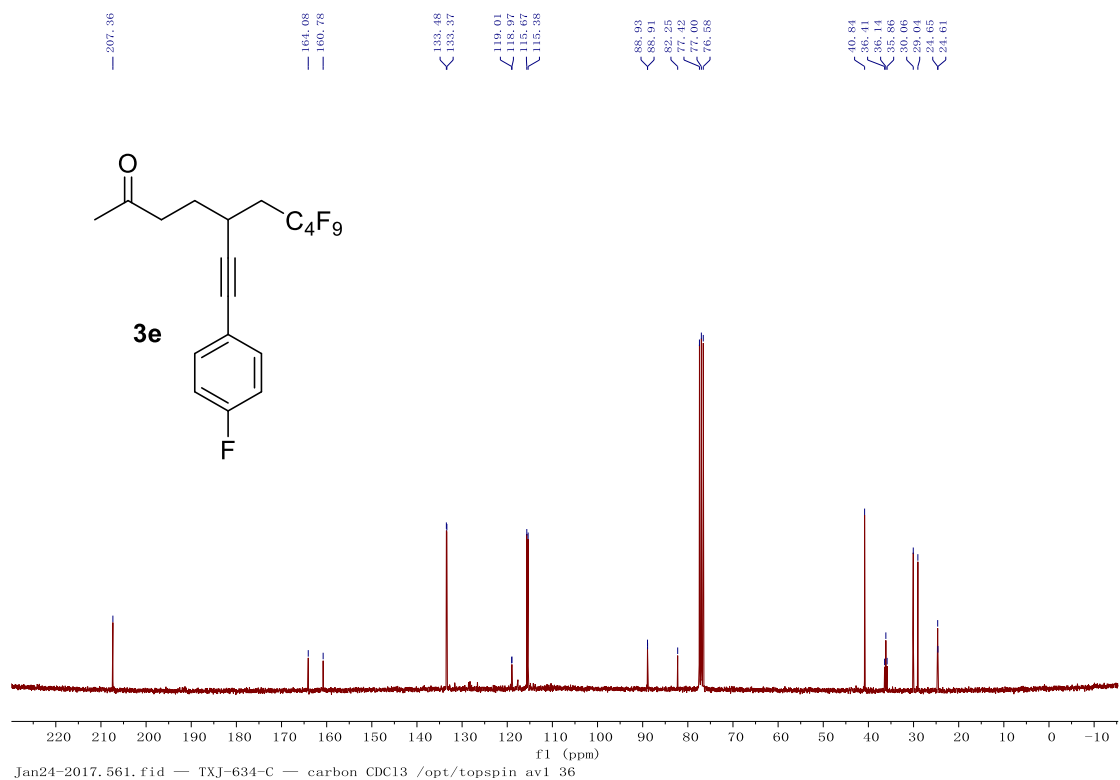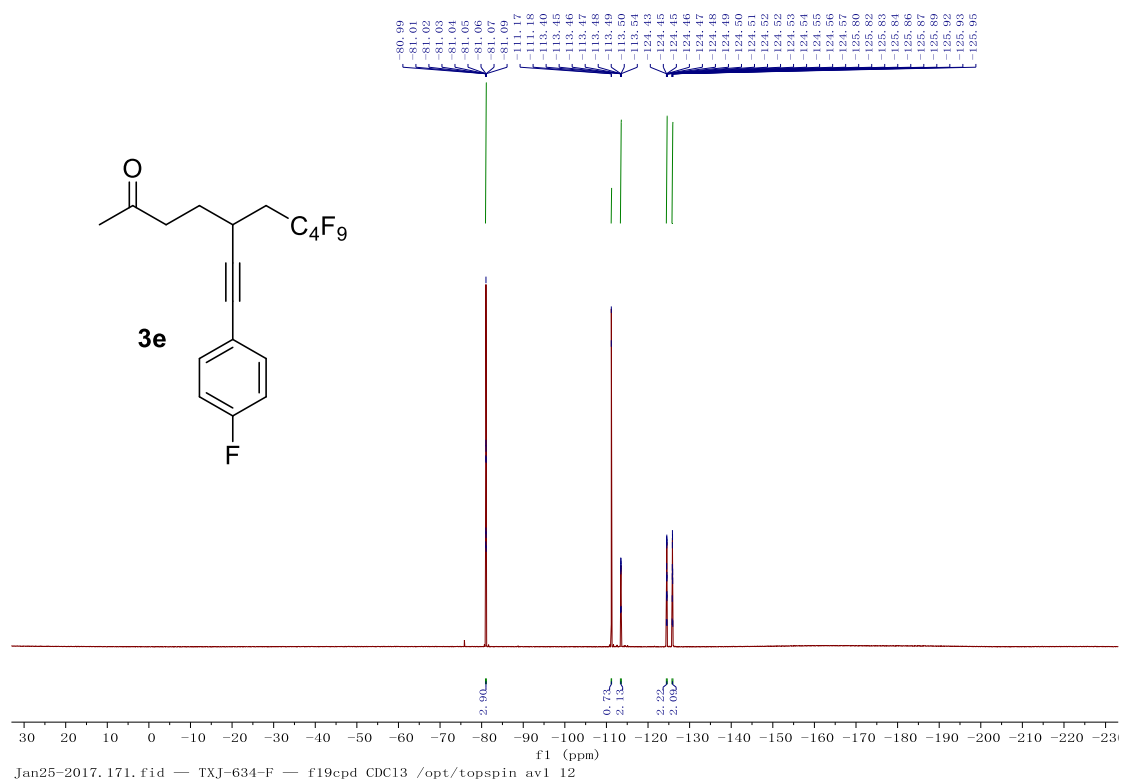

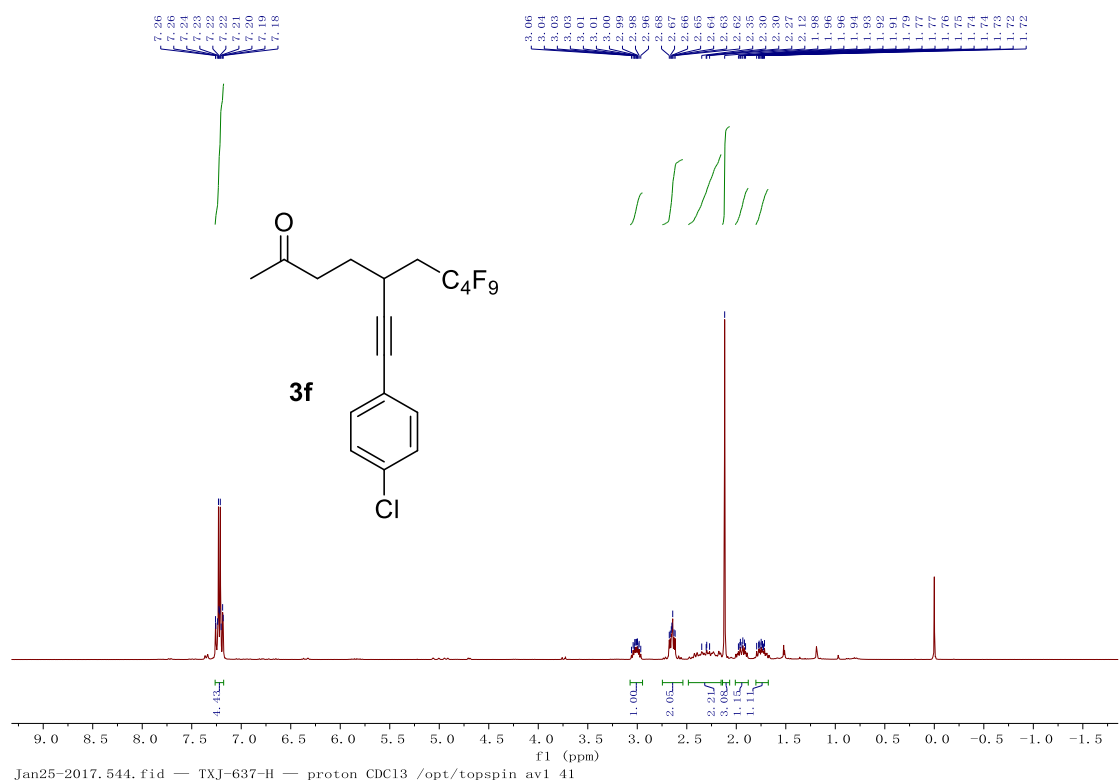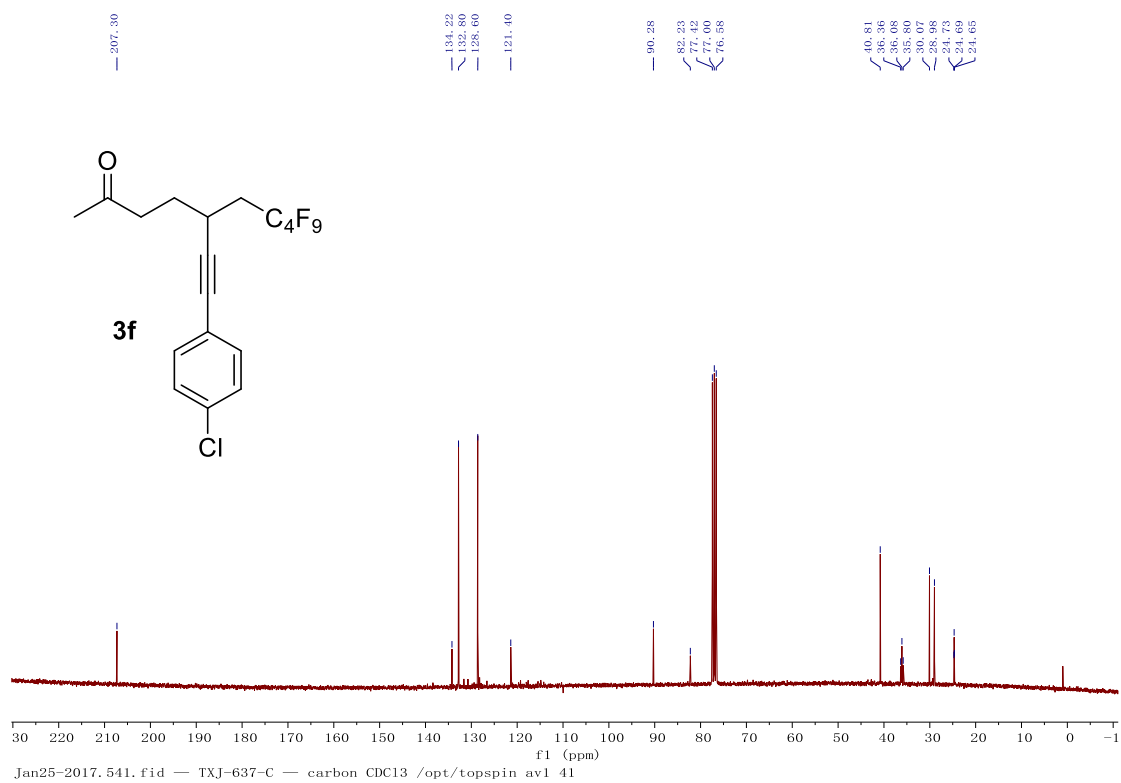

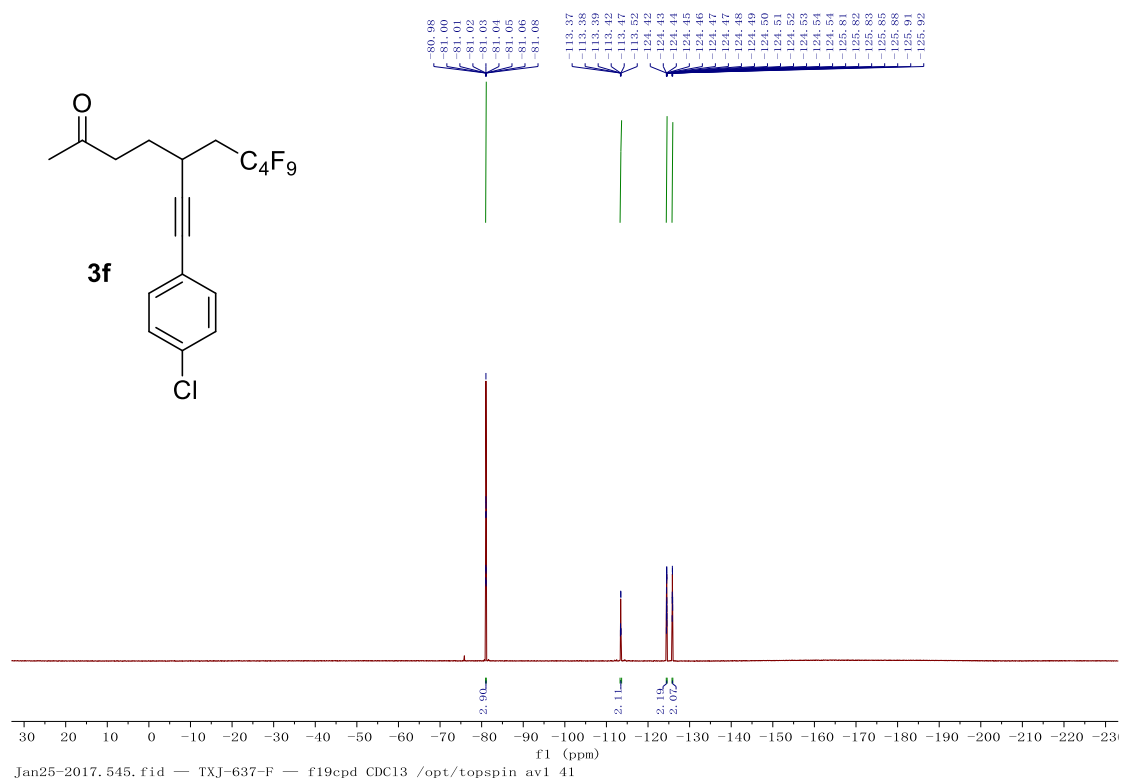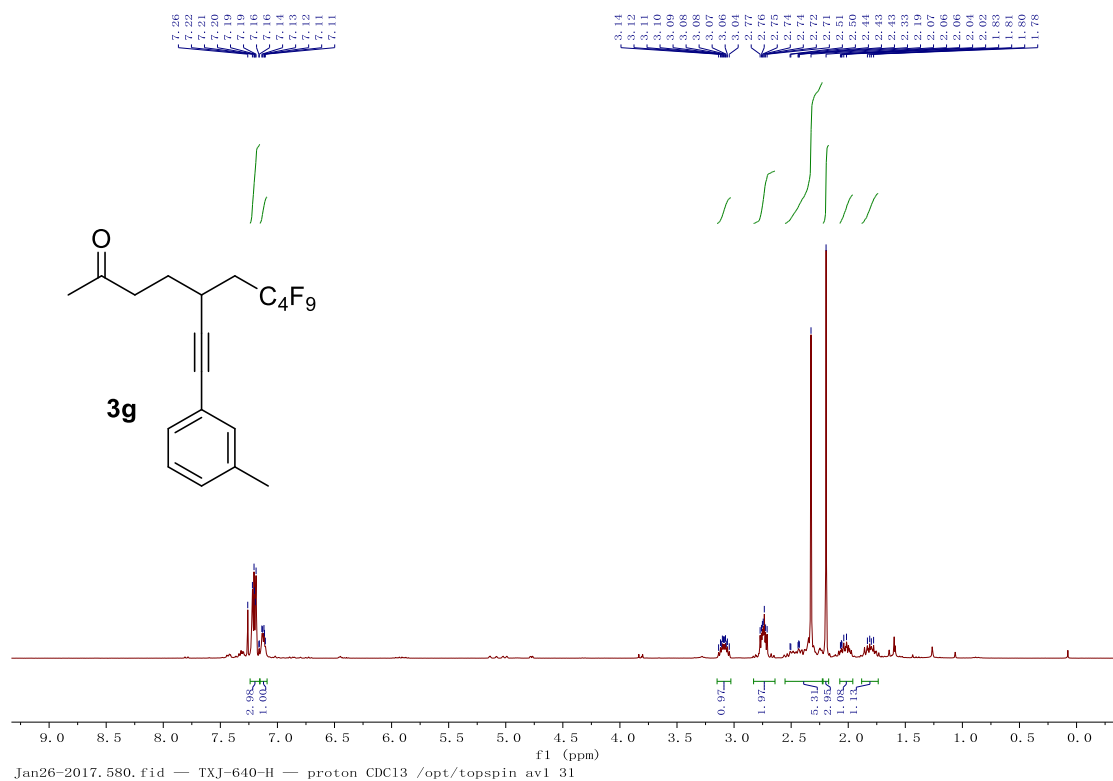

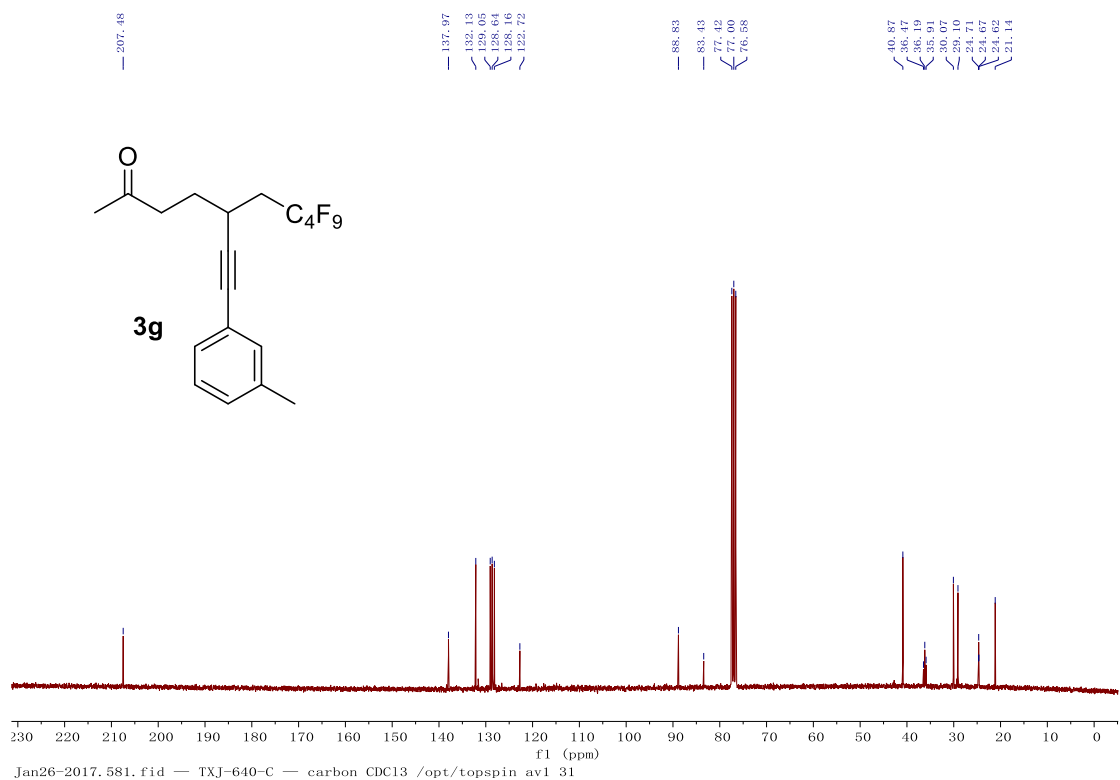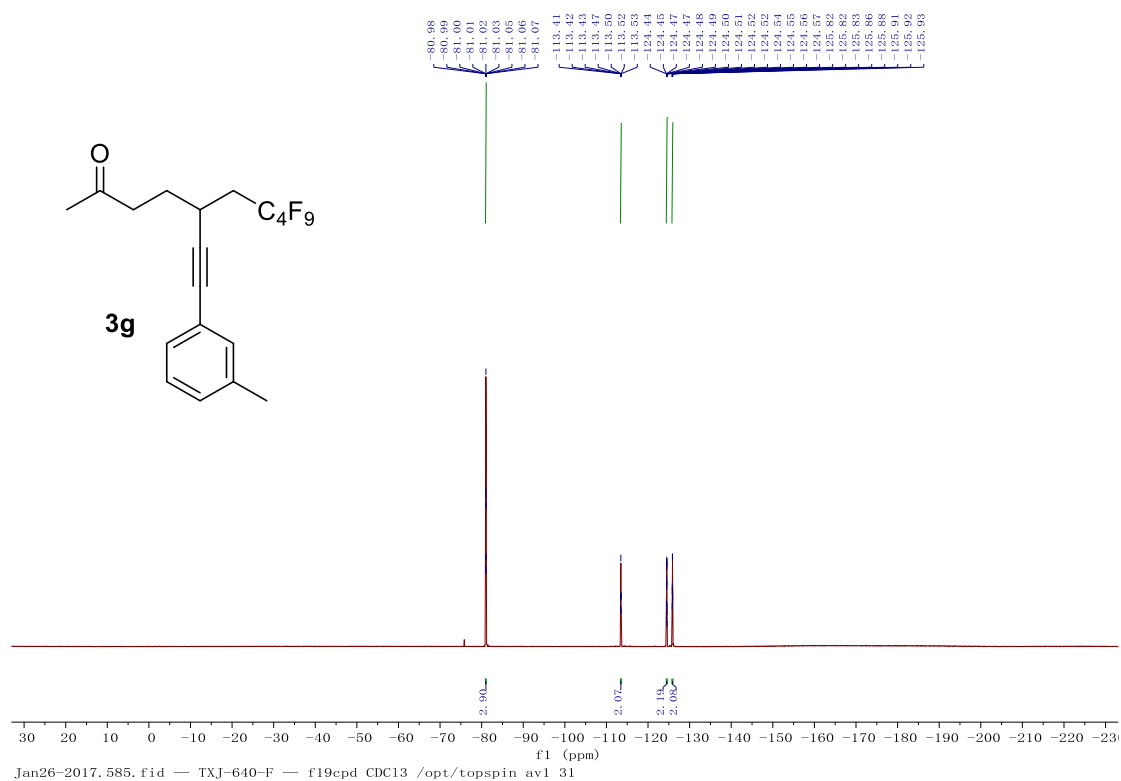



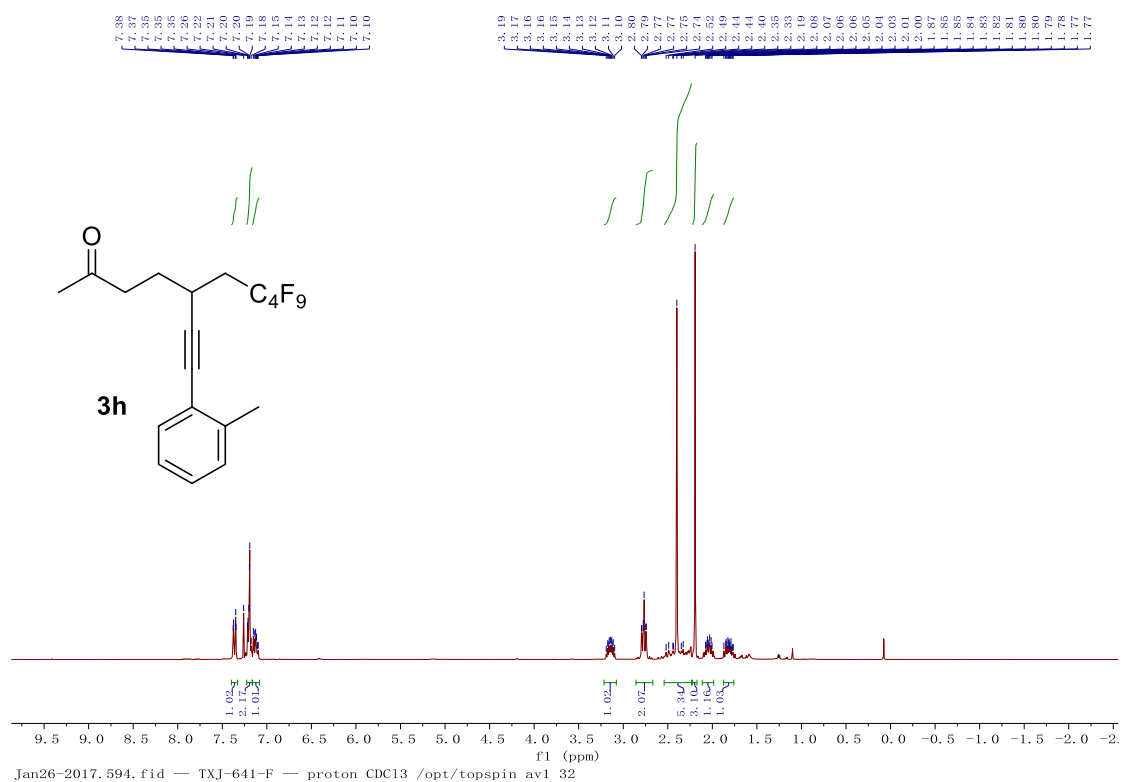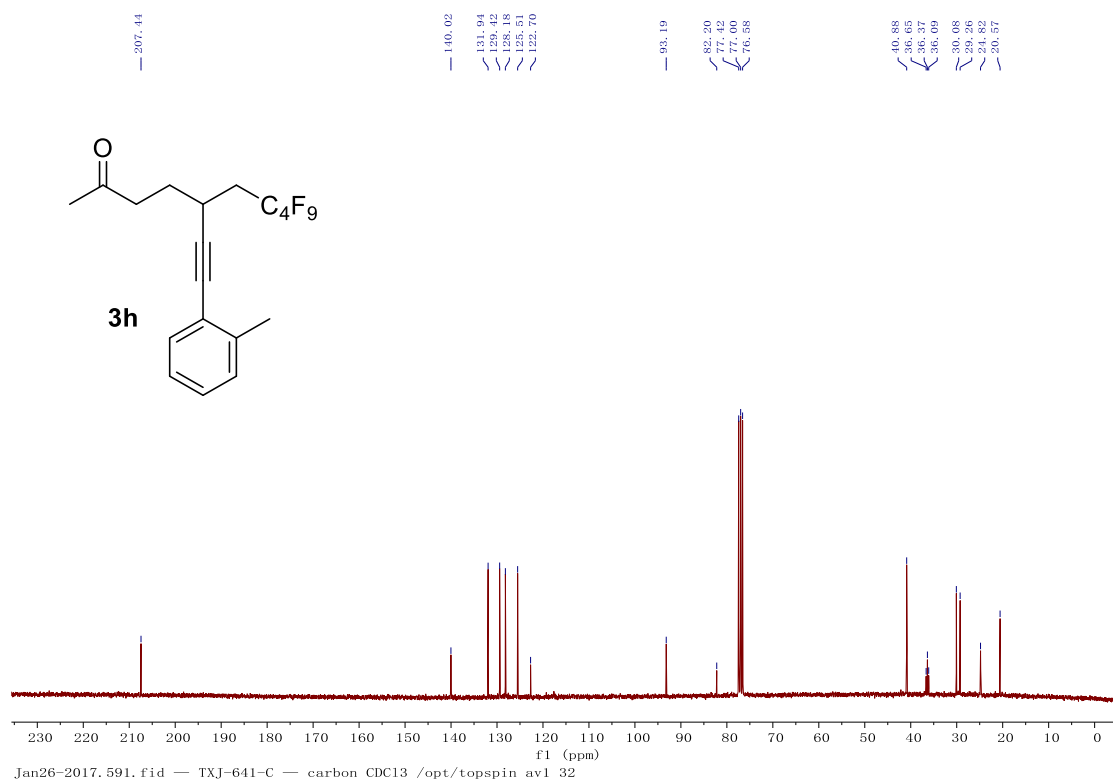

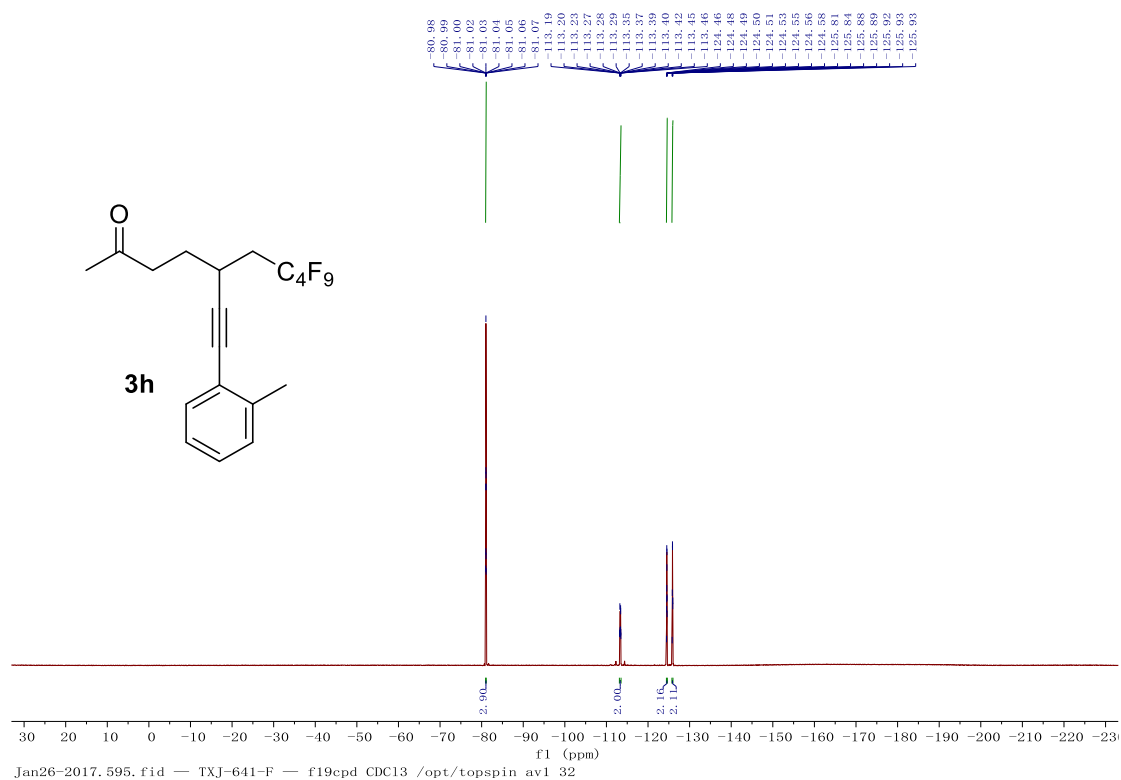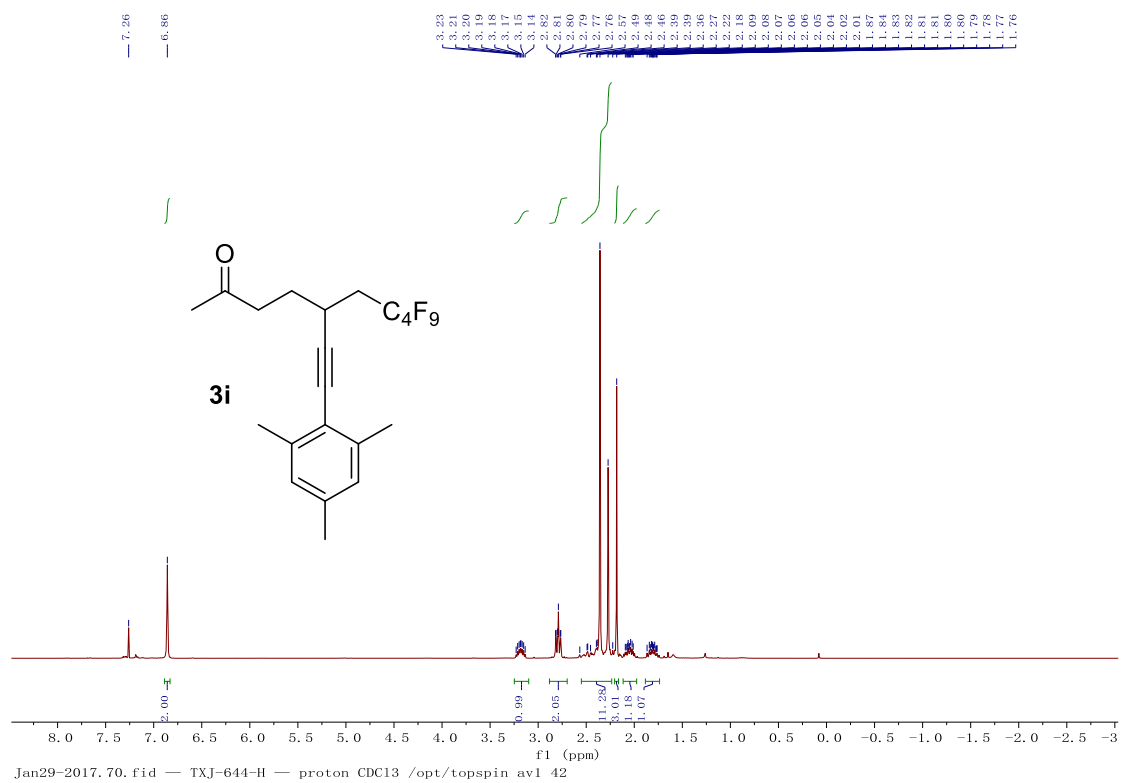

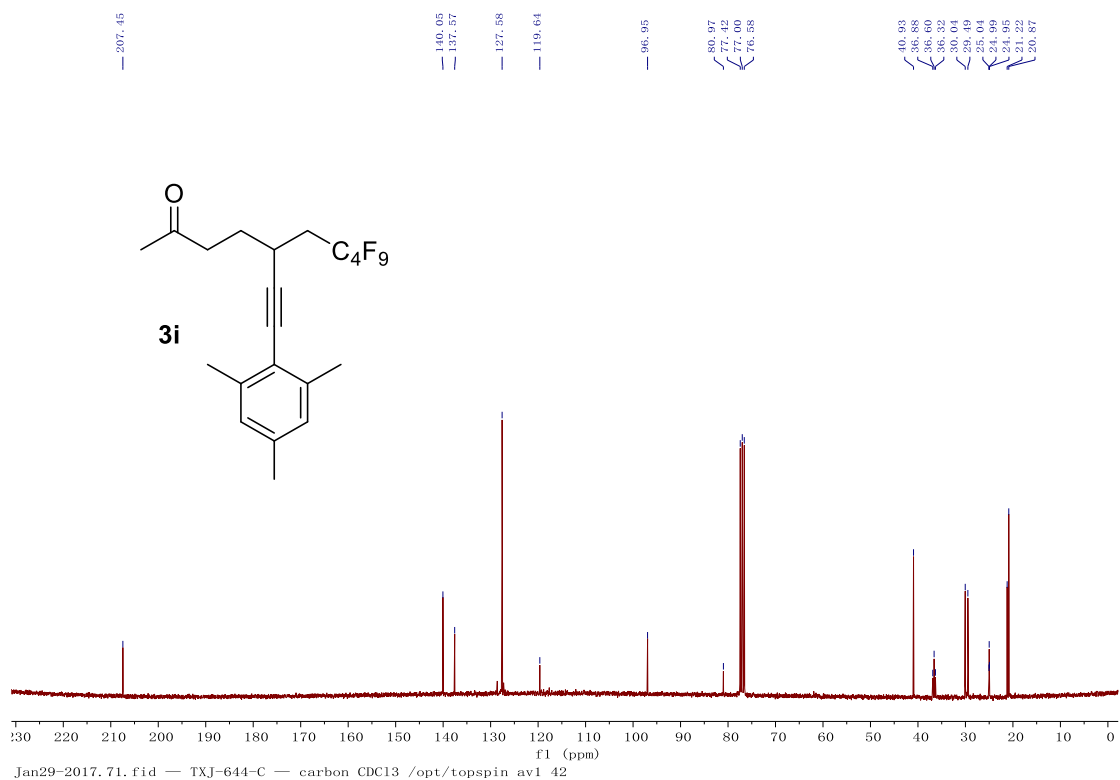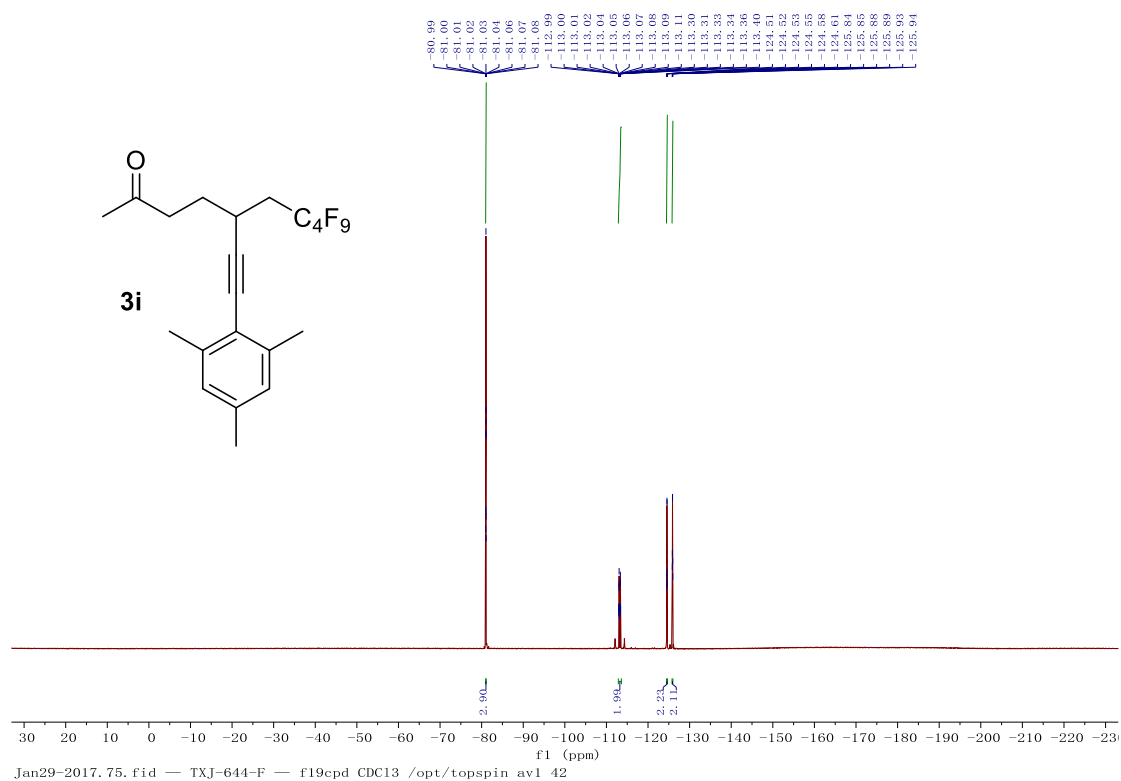

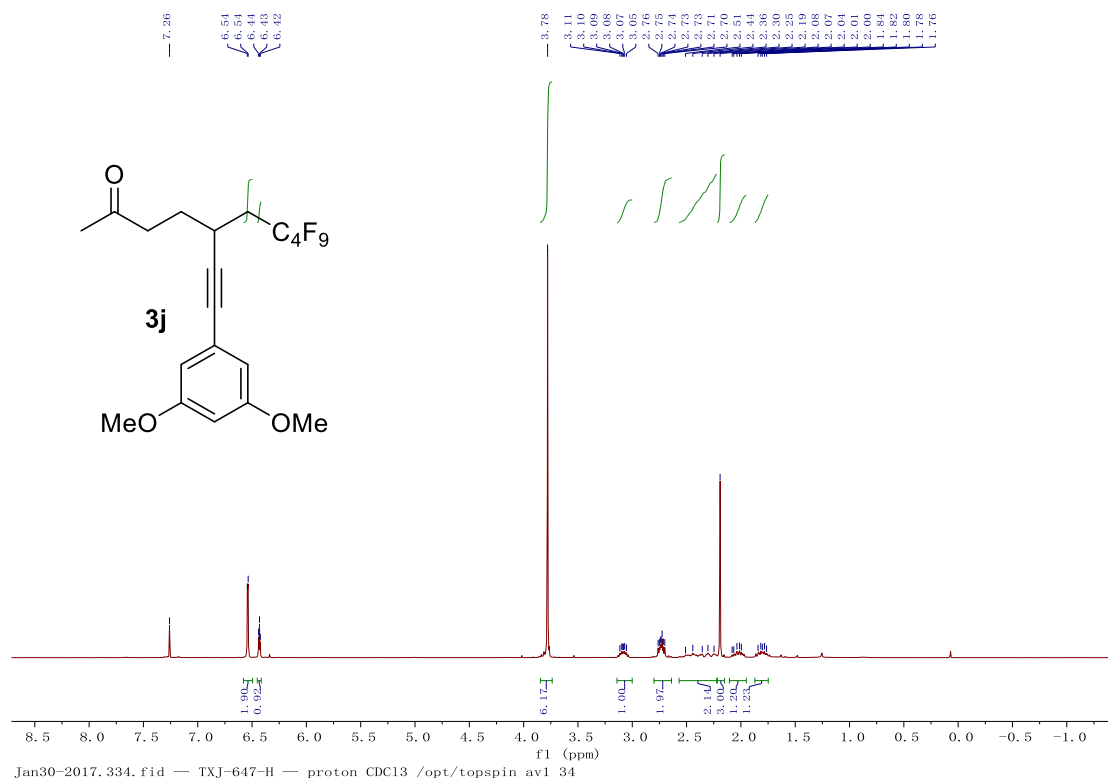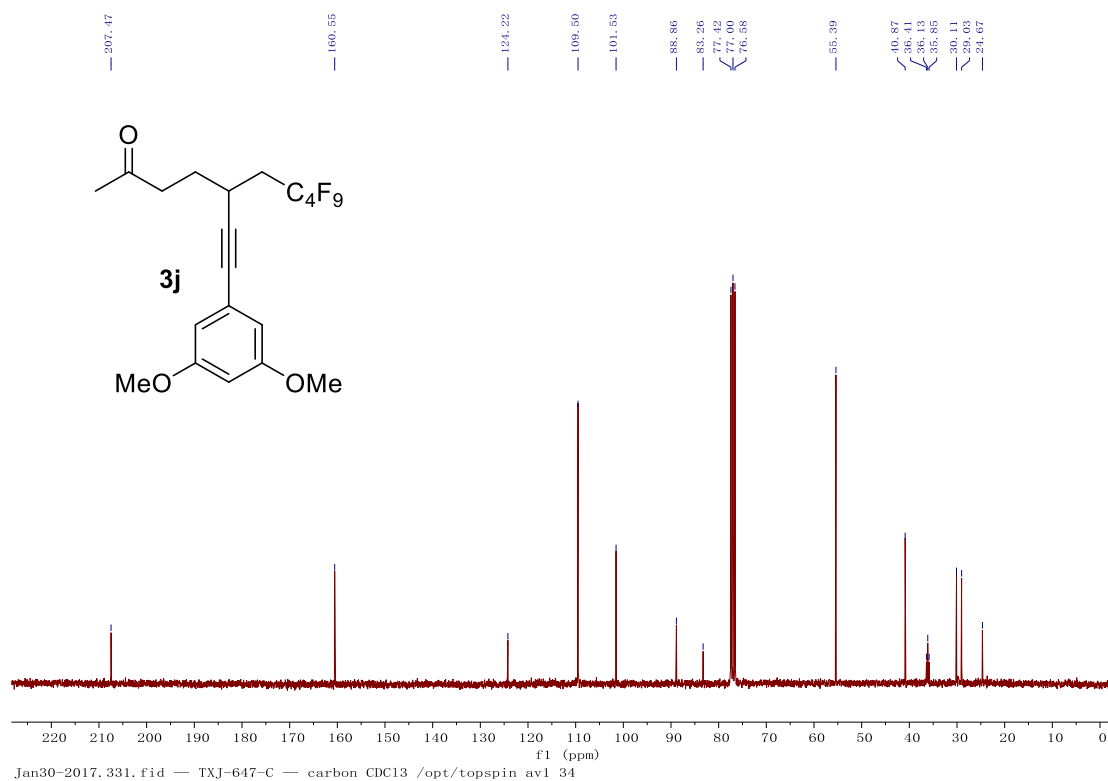

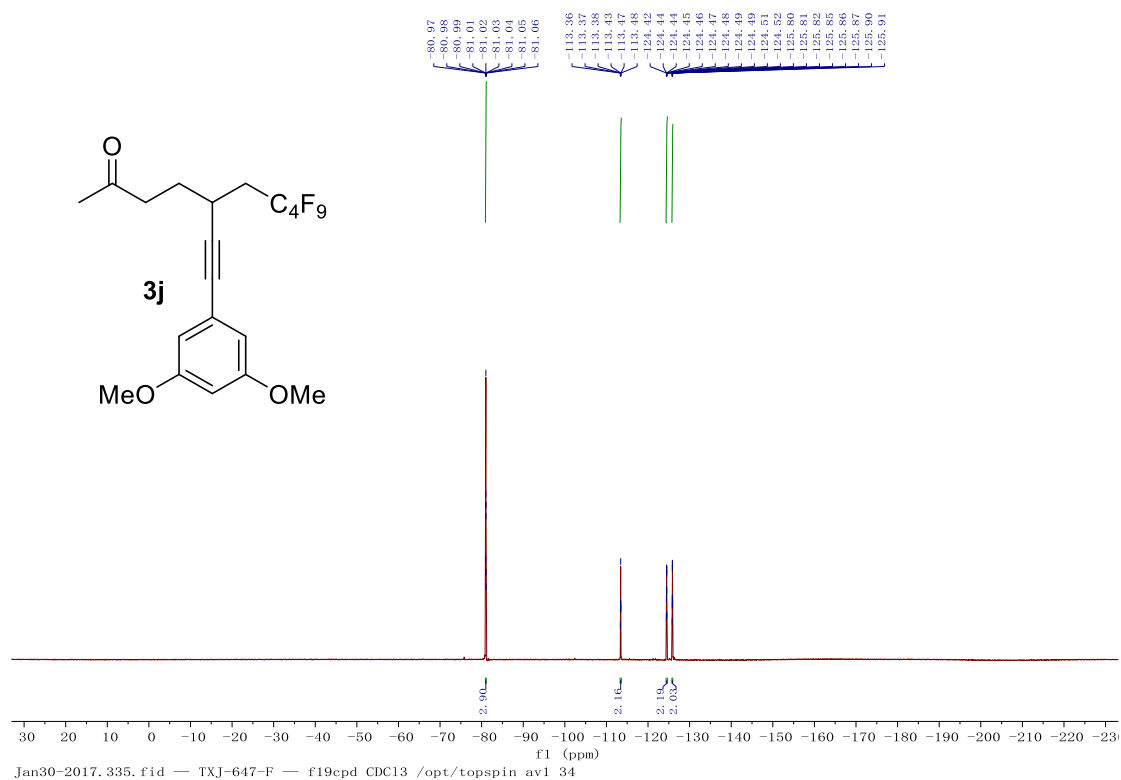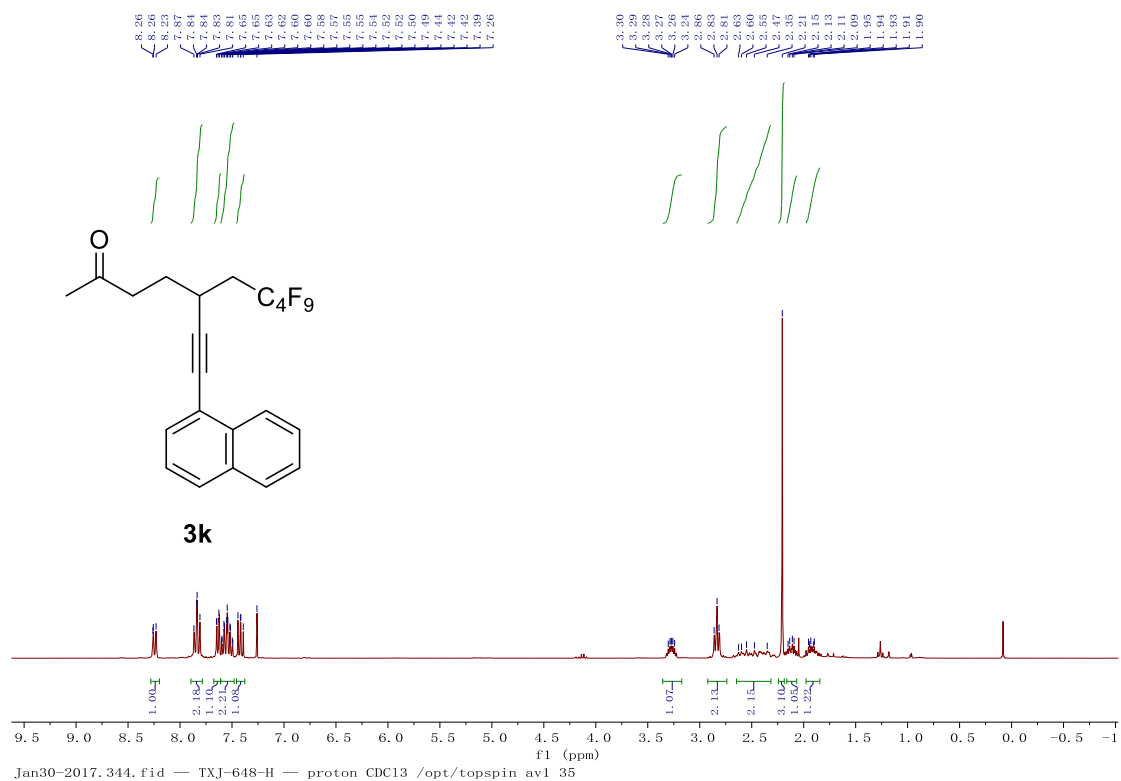

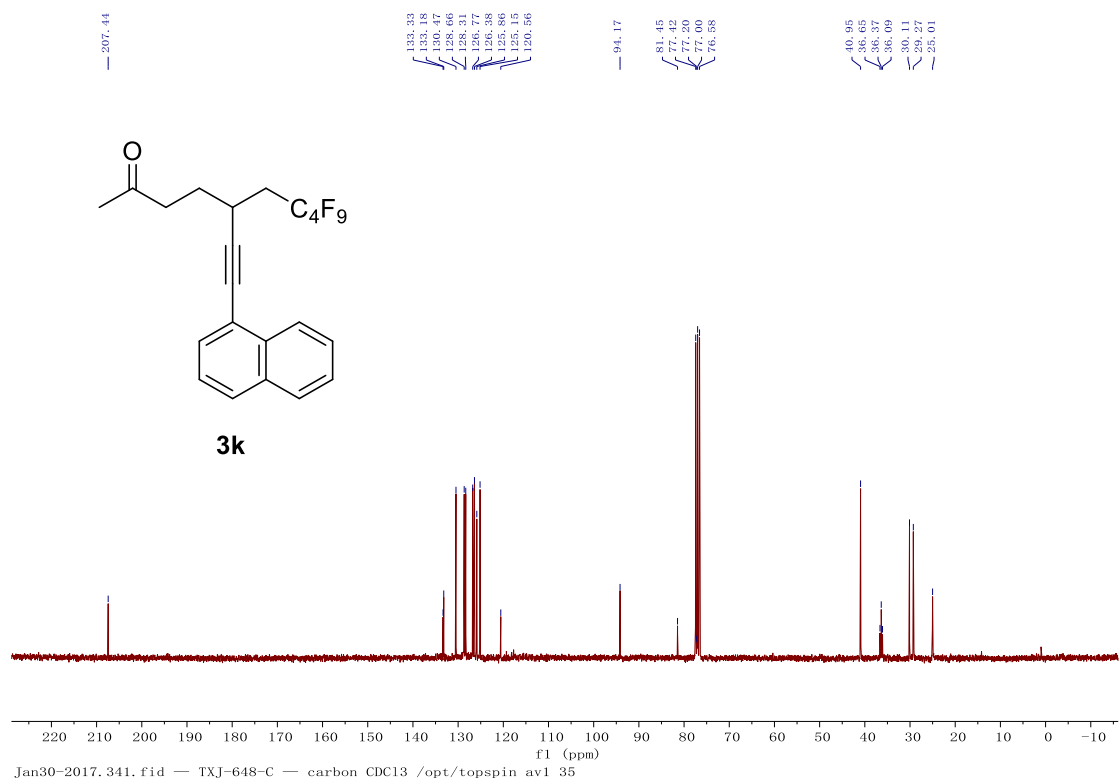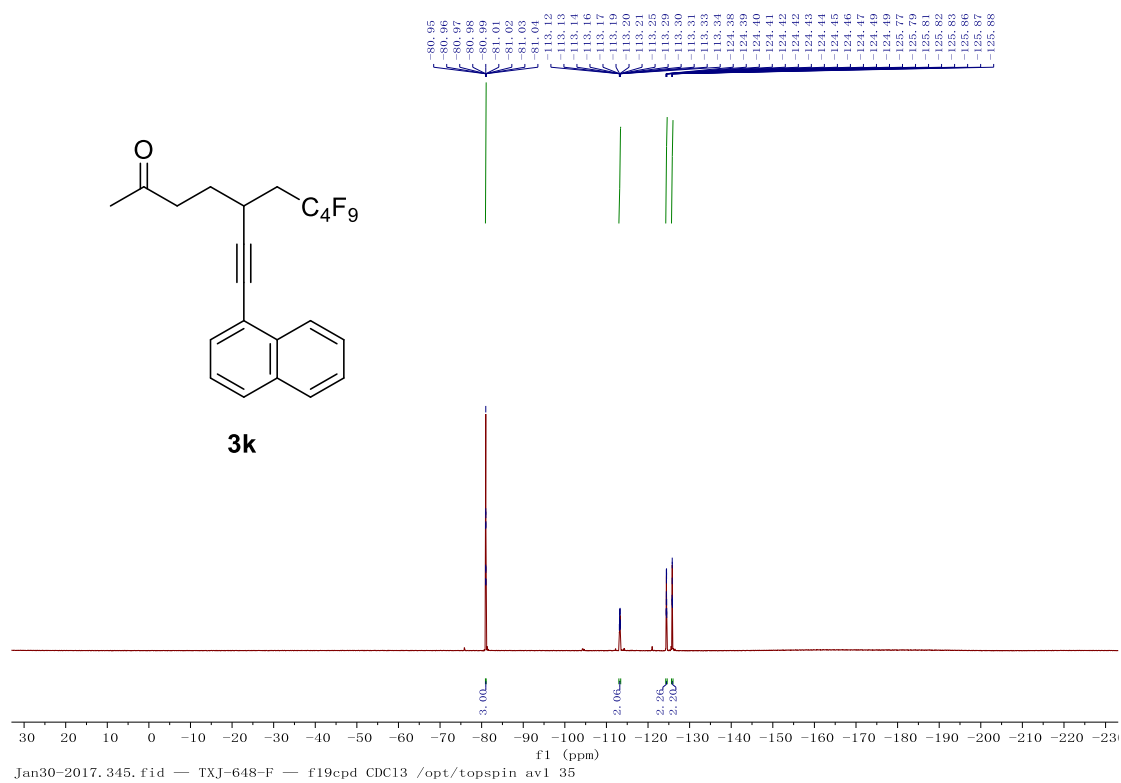







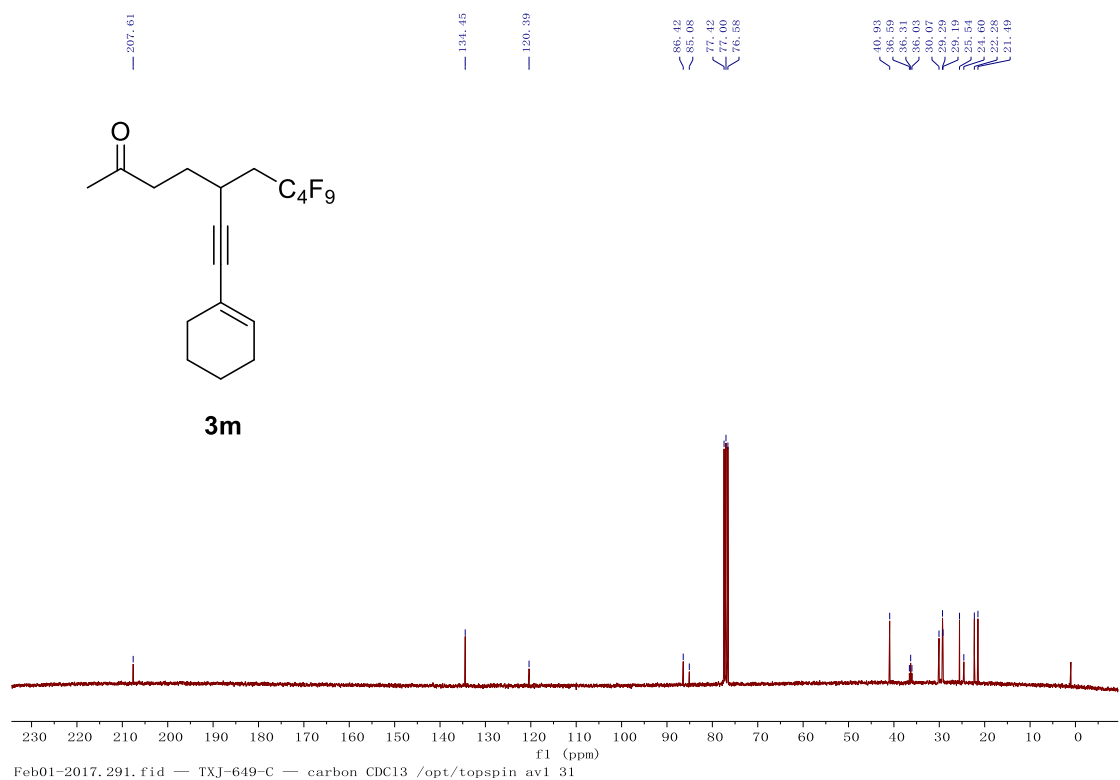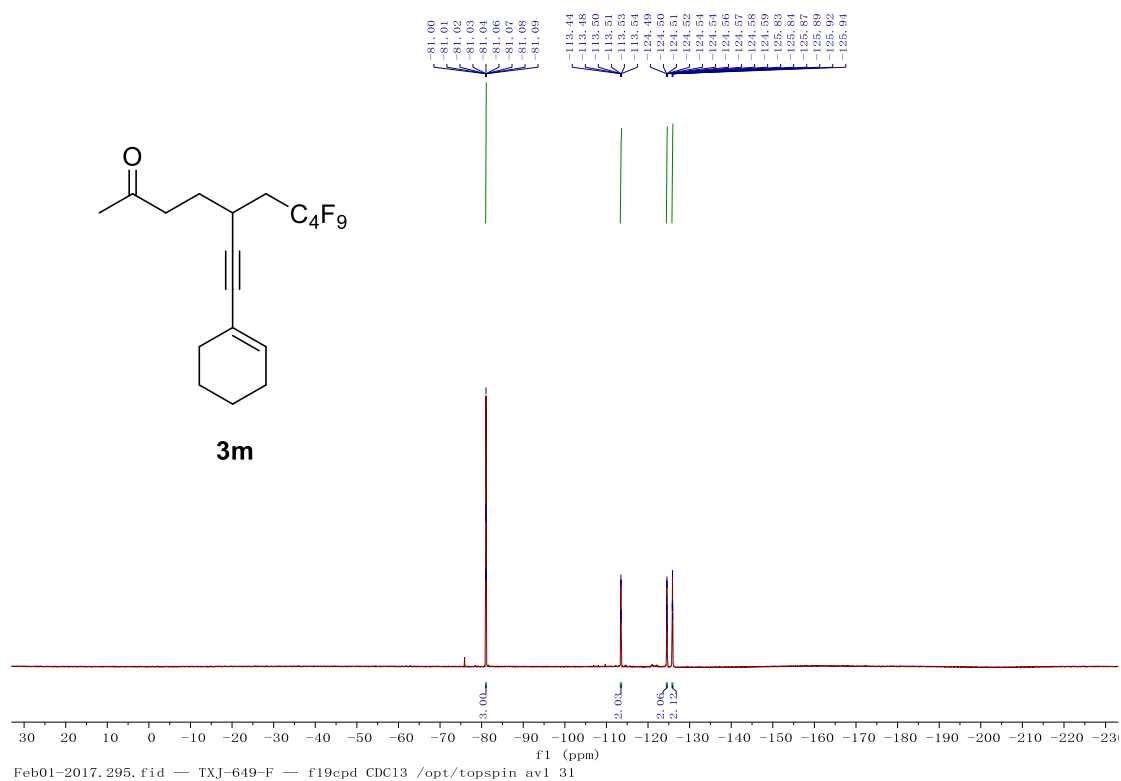

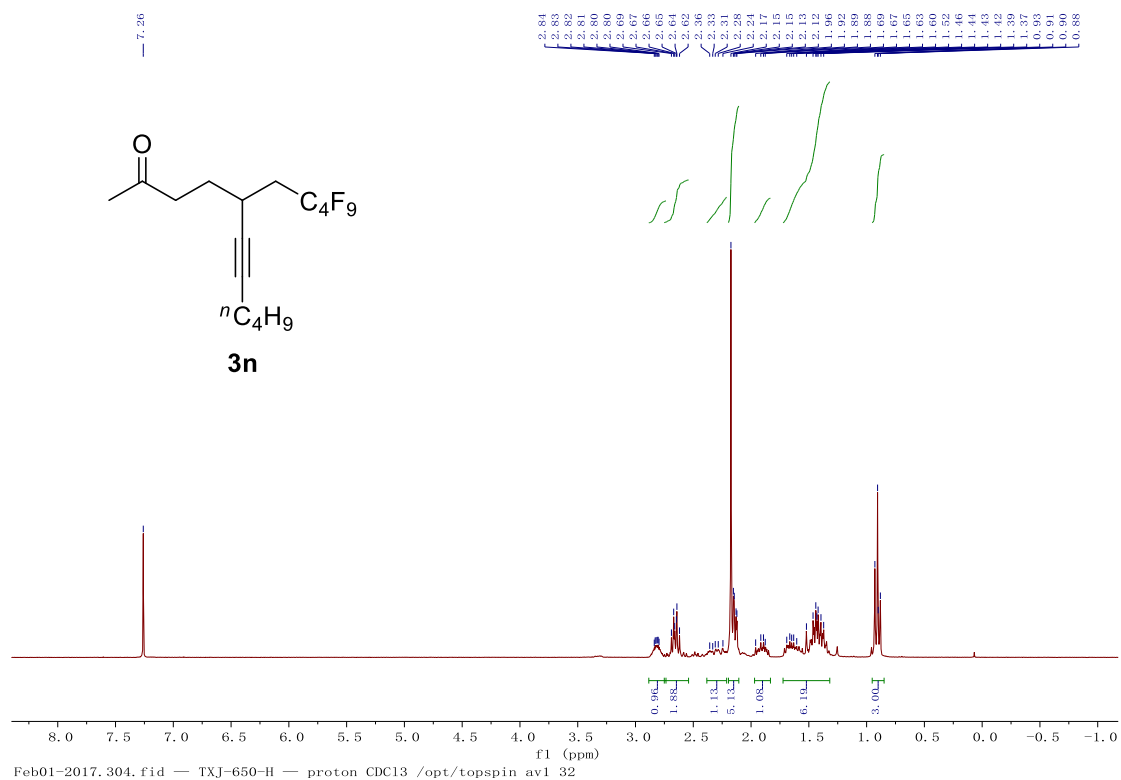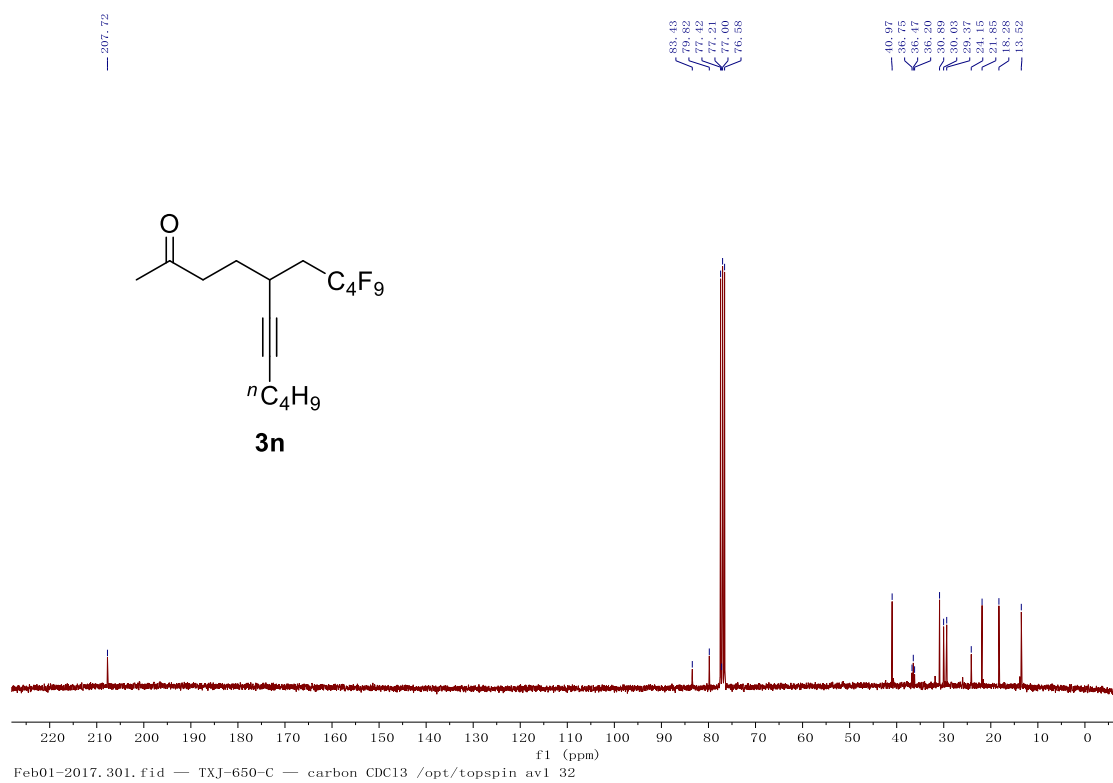

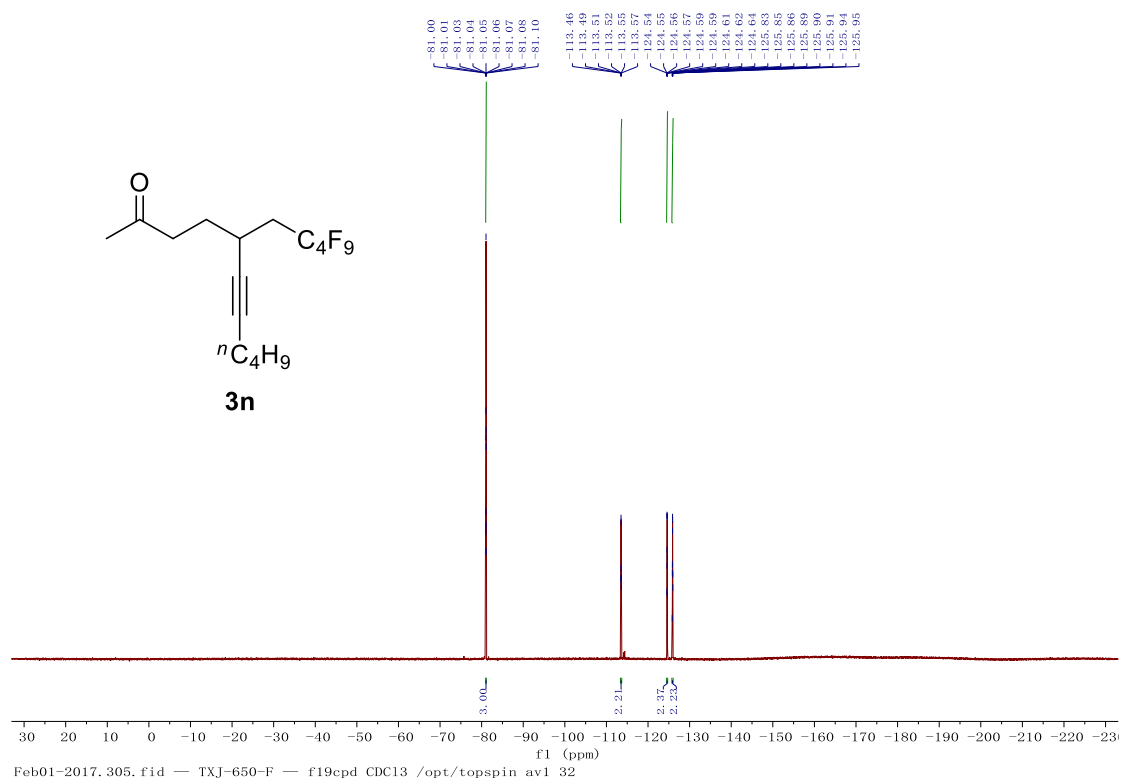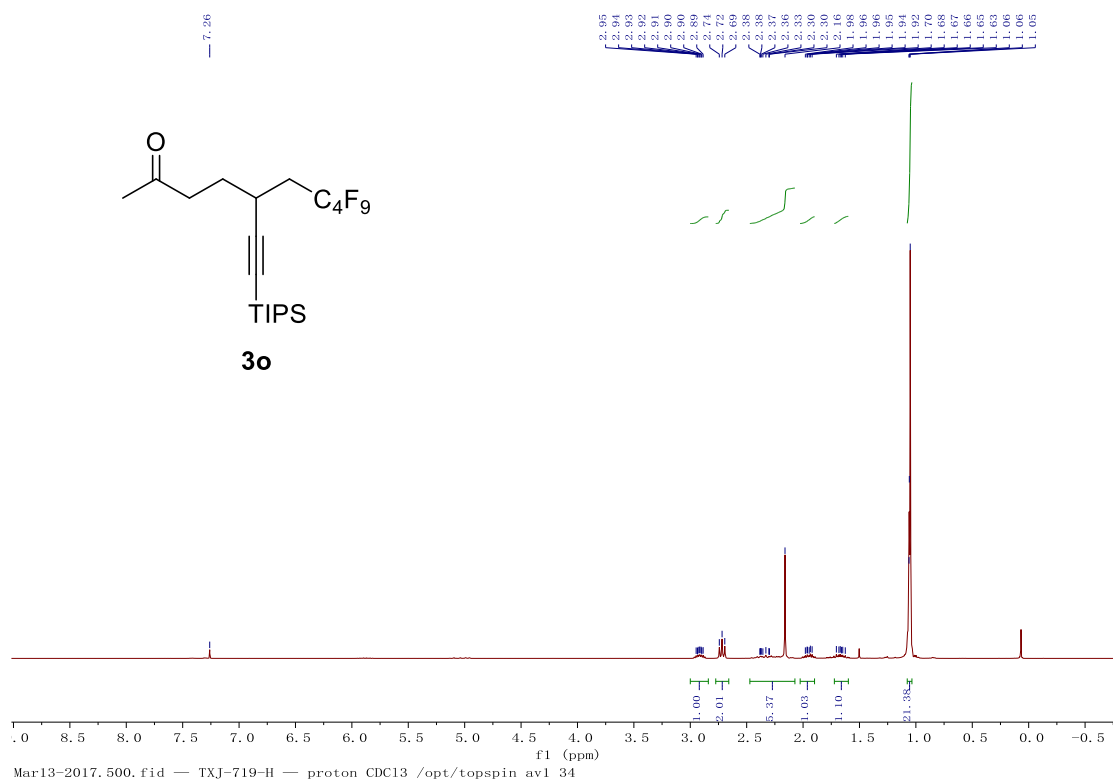

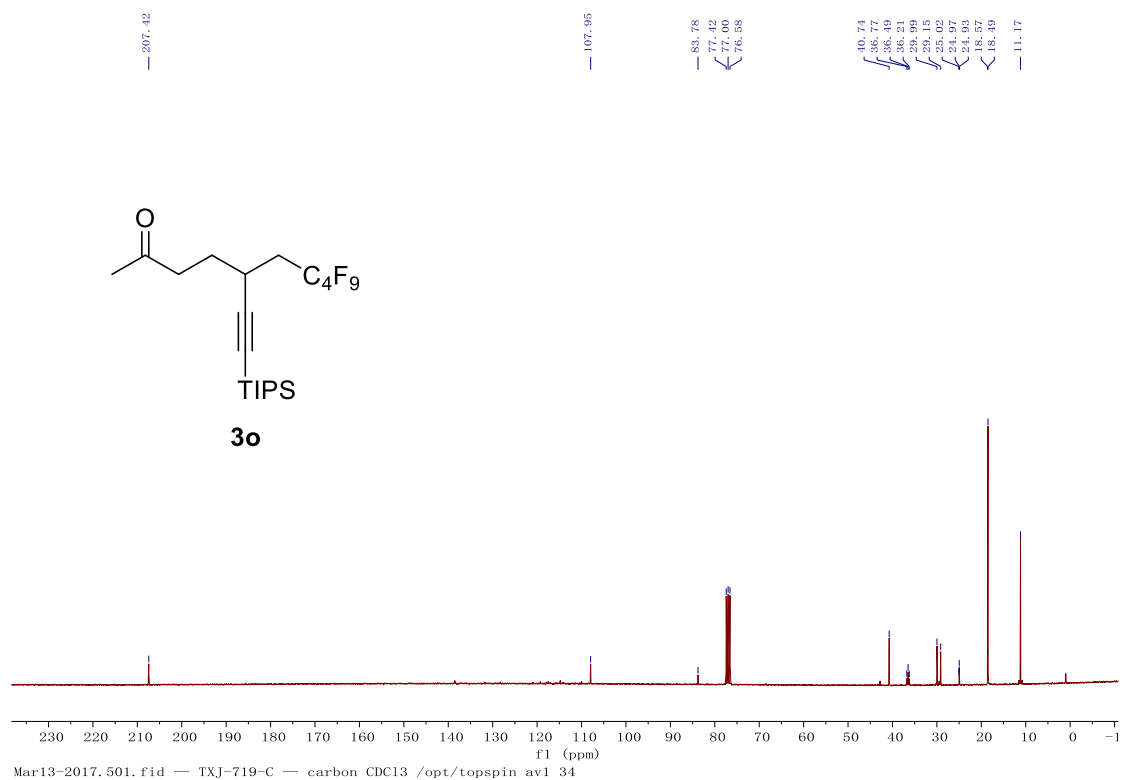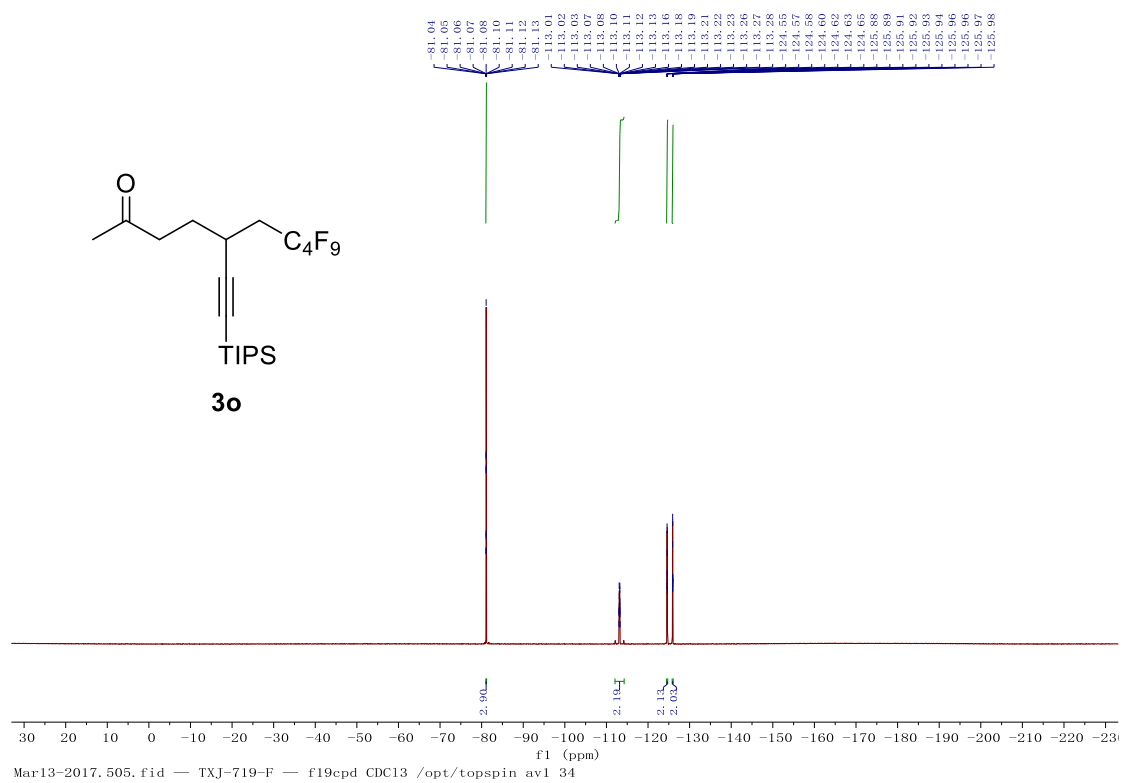

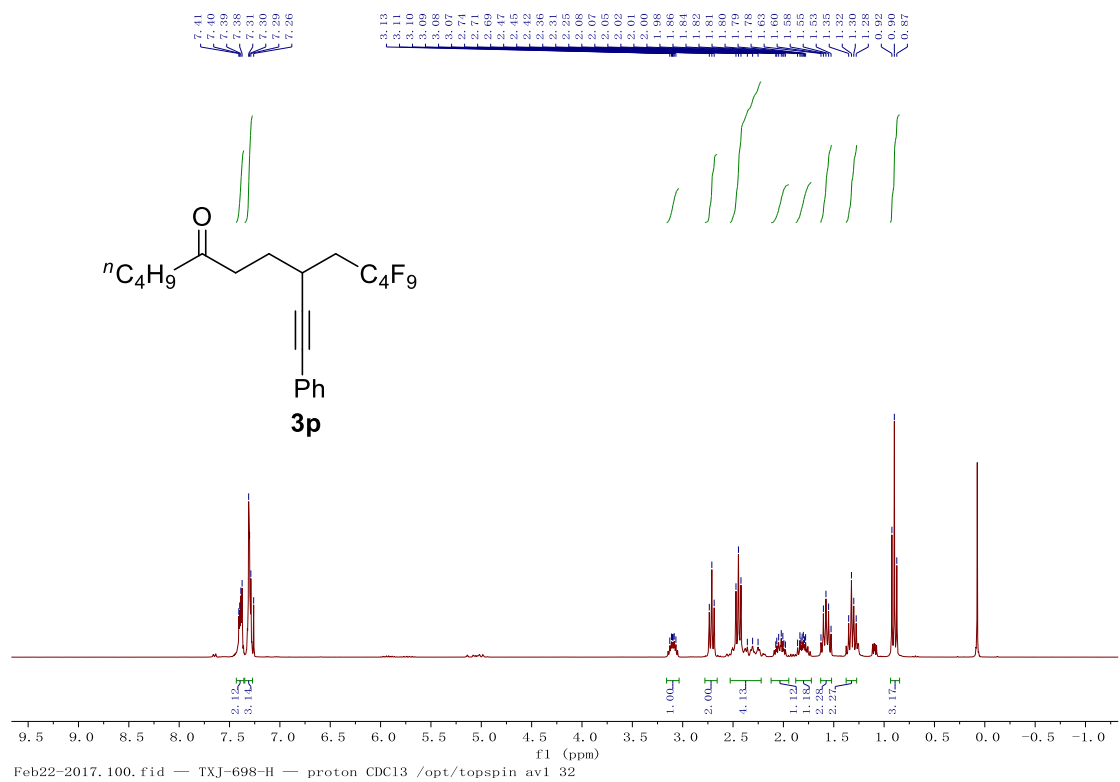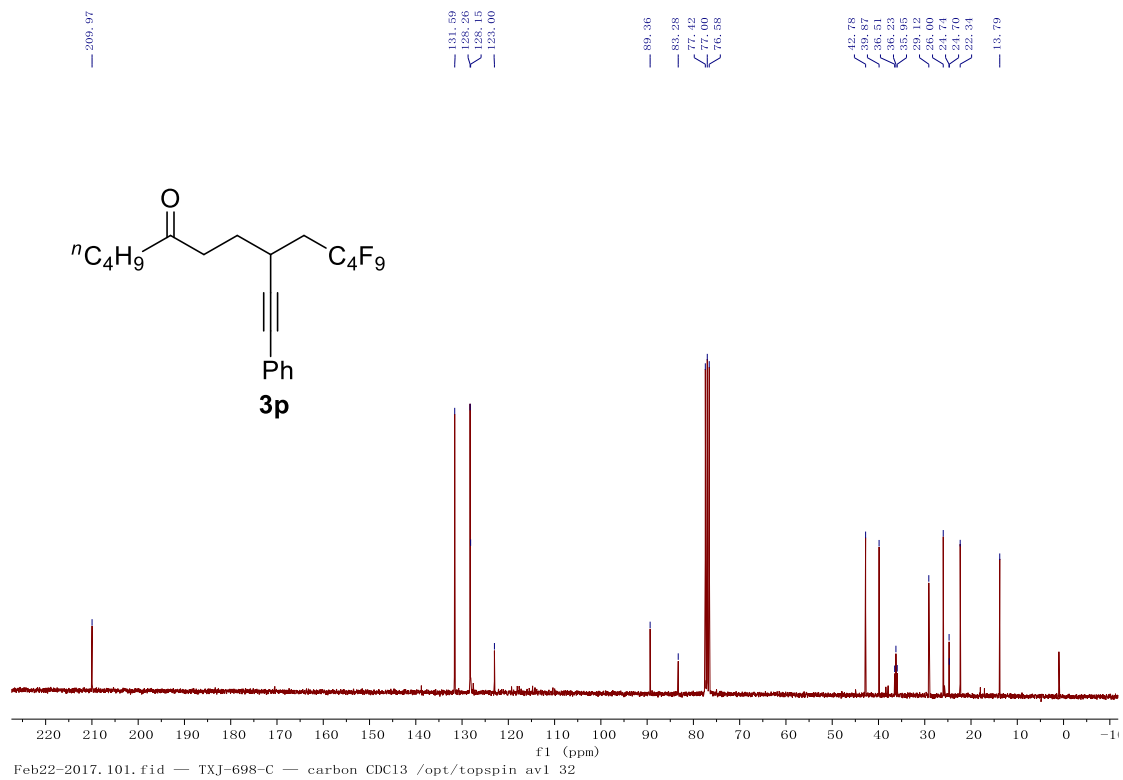

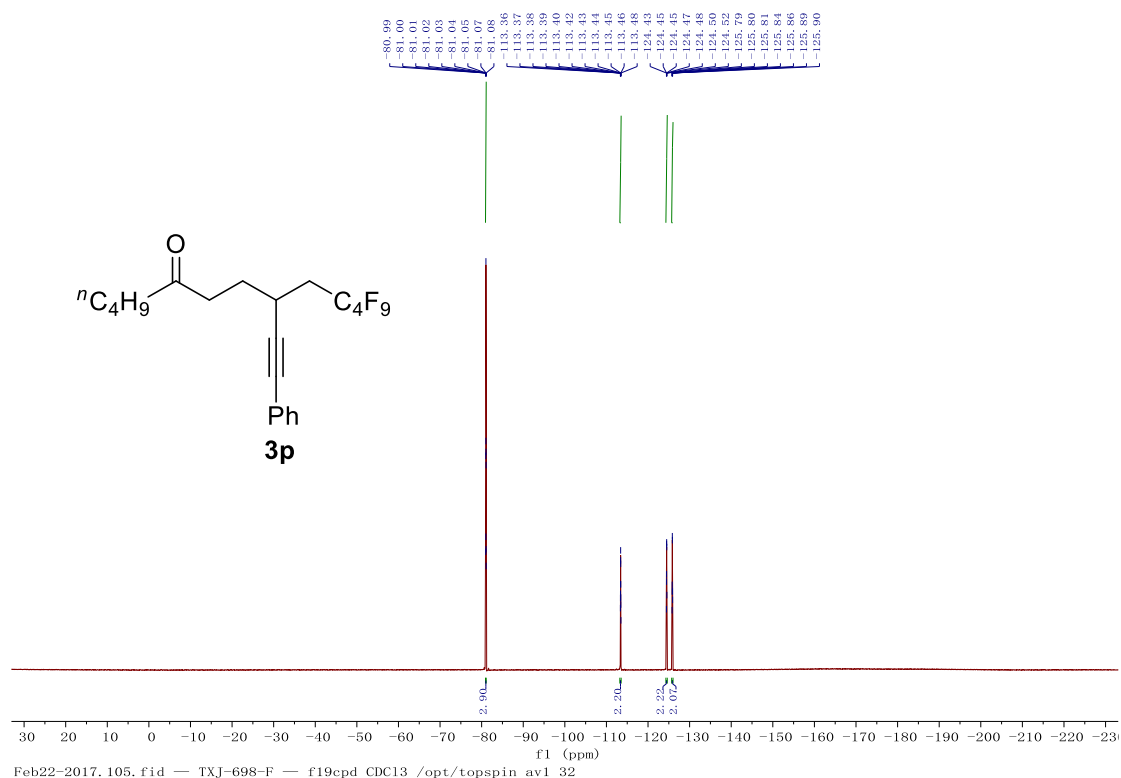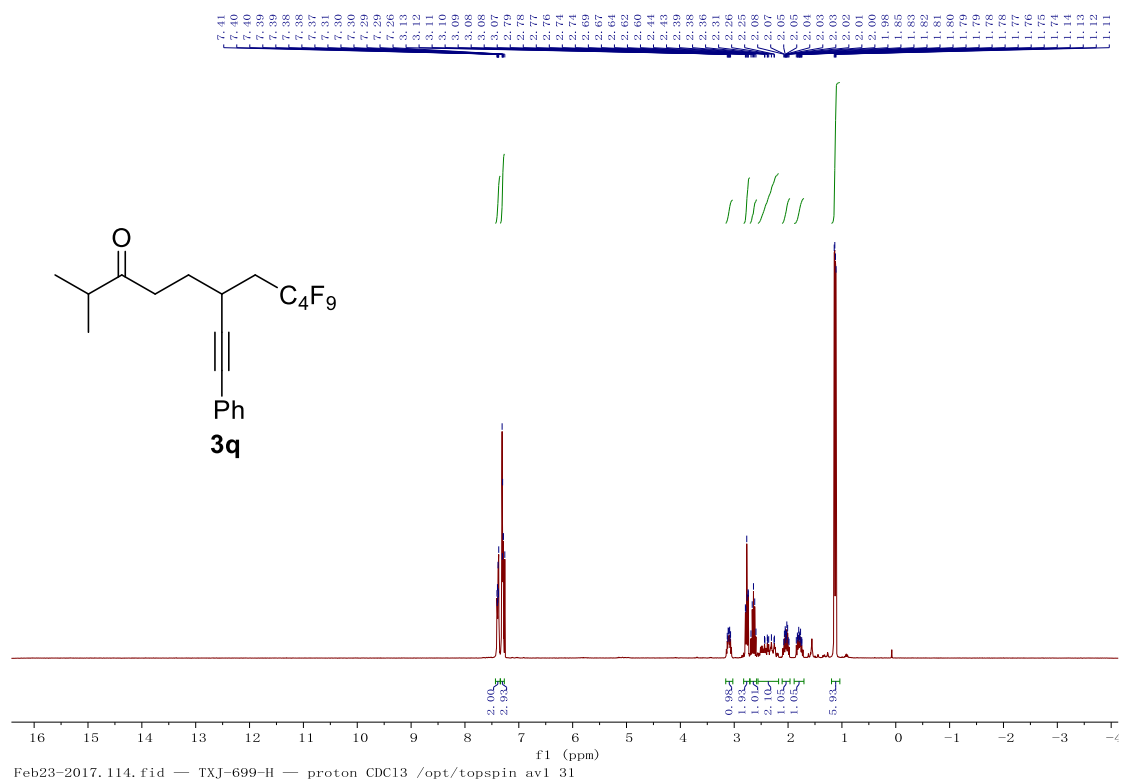

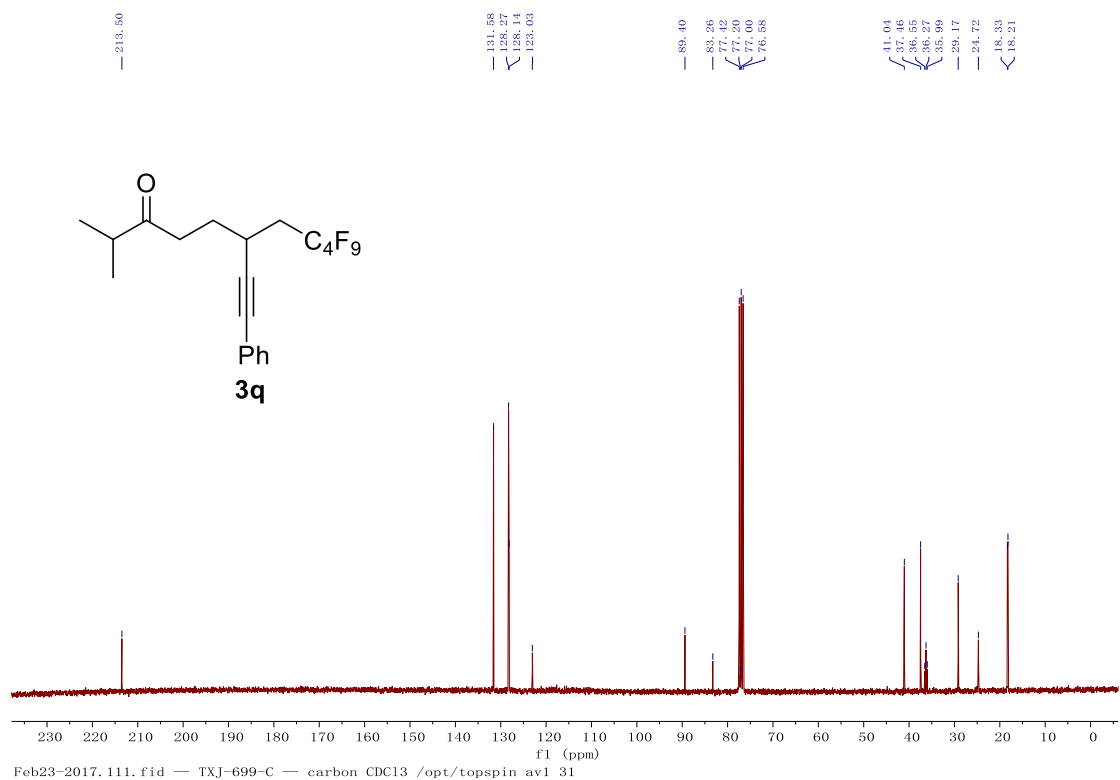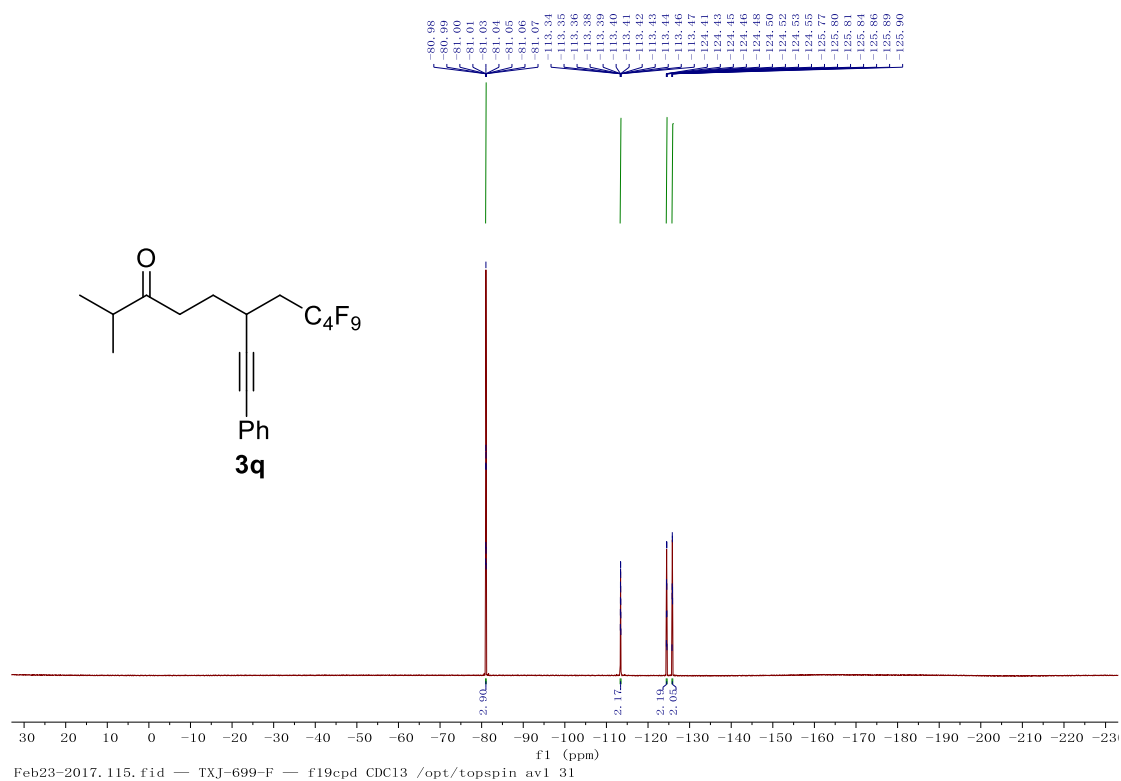

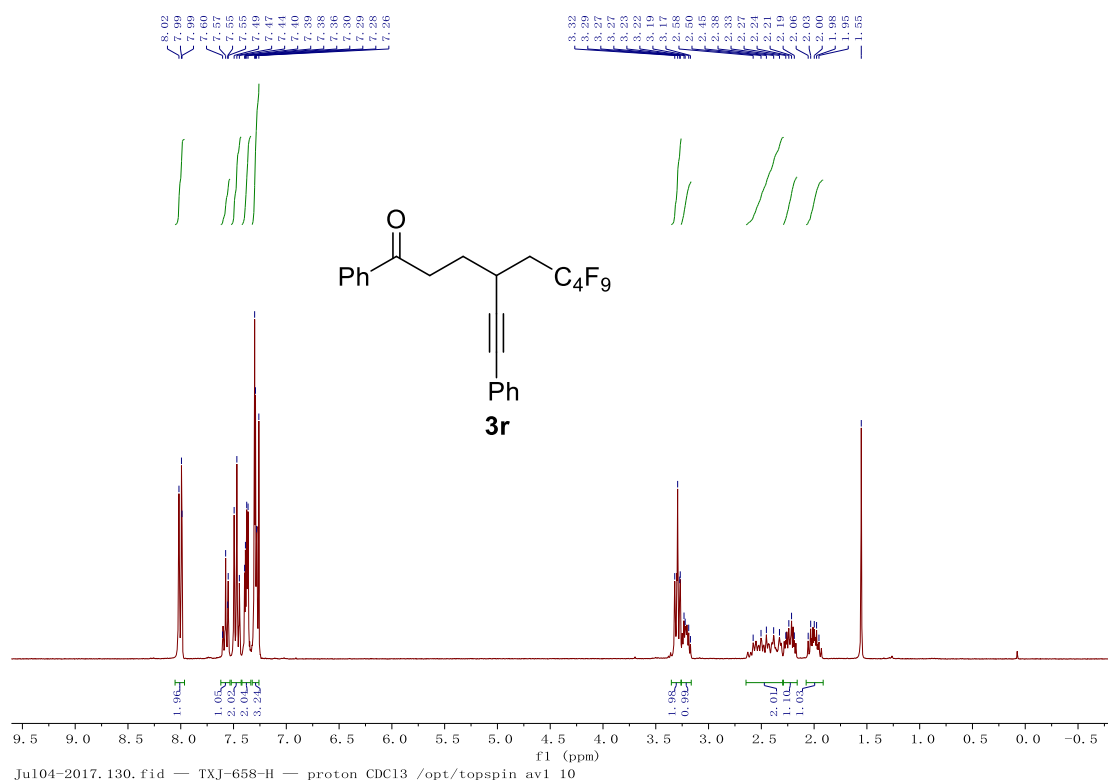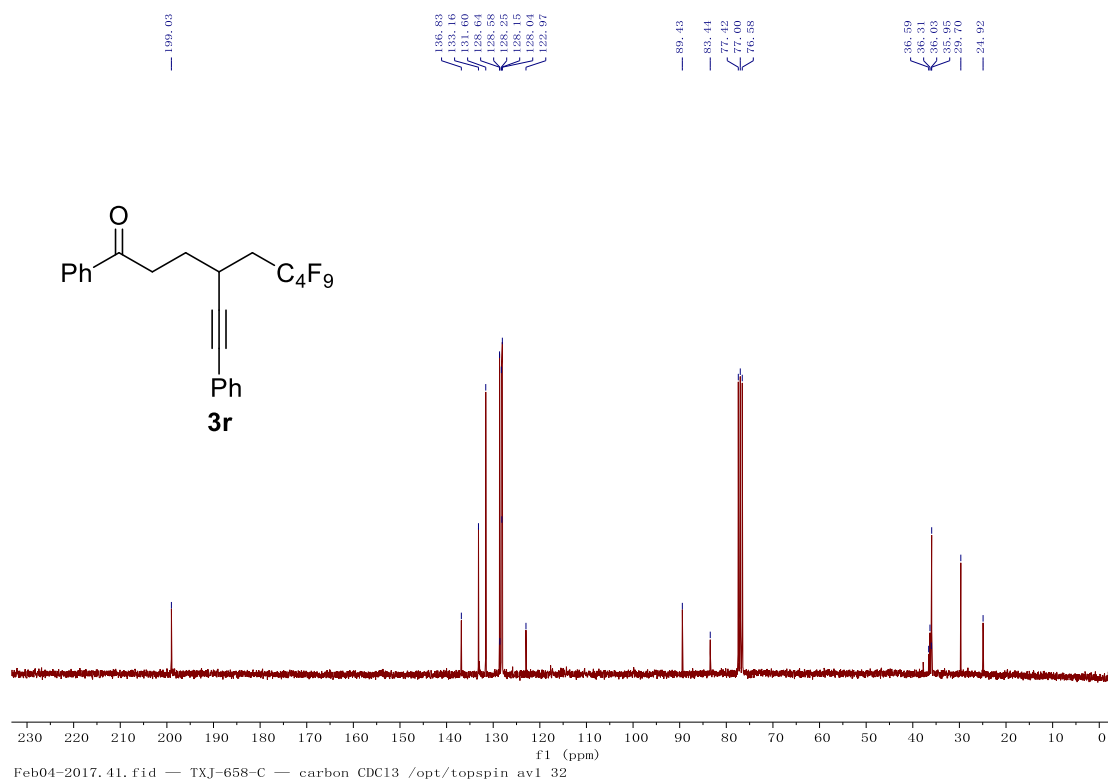





Data File C:\CHEM32\1\DATA\TANG\TXJ658000004.D

Sample Name: TXJ658

```
=====
Acq. Operator   : prekel
Acq. Instrument : Instrument 1          Location : Vial 1
Injection Date  : 11.04.2017 15:31:48      Inj Volume : 5.0 µl

Acq. Method     : C:\CHEM32\1\METHODS\RP CHIRAL\RP CHIRAL_65-35.M
Last changed    : 11.04.2017 15:31:35 by prekel
                  (modified after loading)
Analysis Method : C:\CHEM32\1\METHODS\RP NEUTRAL 1ML\RP_65-35_1.M
Last changed    : 24.06.2016 10:35:17 by prekel
Method Info     : Standard Method RP_65:35_1
                  Flow: 1mL/min; 20°C; Injection 5µL; time: 50min
                  Solvent System: MeCN/H2O=65/35
                  isocratic

Sample Info     : OJ-RH
                  ACN/H2O
=====
```

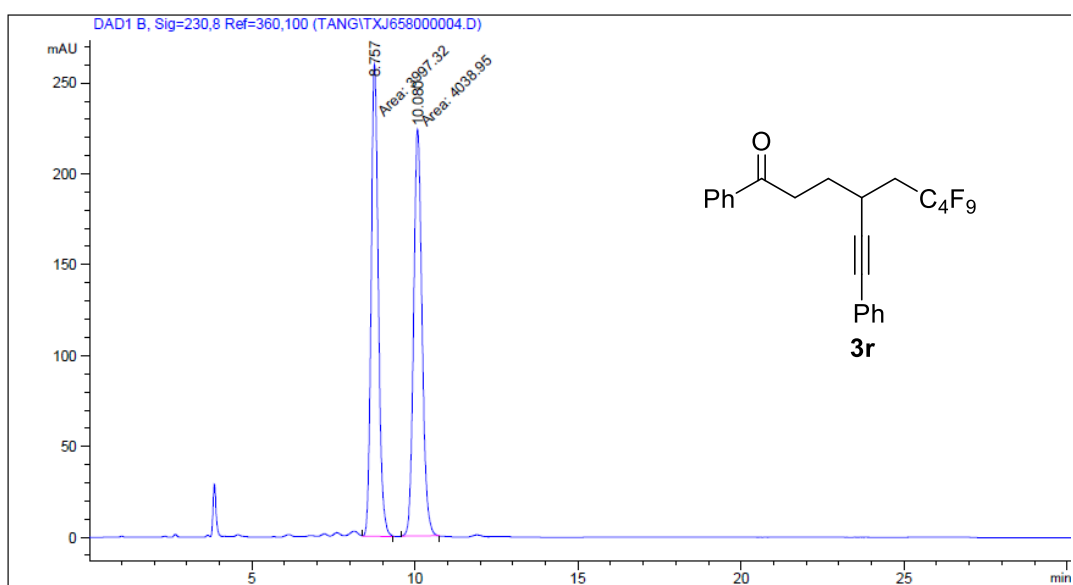

Area Percent Report

```
=====
Sorted By      :      Signal
Multiplier:    :      1.0000
Dilution:      :      1.0000
Use Multiplier & Dilution Factor with ISTDs
=====
```

Data File C:\CHEM32\1\DATA\TANG\TXJ745000001.D  
Sample Name: TXJ745

```
=====
Acq. Operator   : prekel
Acq. Instrument : Instrument 1                Location : Vial 1
Injection Date  : 11.04.2017 16:05:49
                                           Inj Volume : 5.0 µl
Acq. Method     : C:\CHEM32\1\METHODS\RP CHIRAL\RP CHIRAL_65-35.M
Last changed    : 11.04.2017 16:03:39 by prekel
                  (modified after loading)
Analysis Method : C:\CHEM32\1\METHODS\RP NEUTRAL 1ML\RP_65-35_1.M
Last changed    : 24.06.2016 10:35:17 by prekel
Method Info     : Standard Method RP_65:35_1
                  Flow: 1mL/min; 20°C; Injection 5µL; time: 50min
                  Solvent System: MeCN/H2O=65/35
                  isocratic

Sample Info     : OJ-RH
                  ACN/H2O
=====
```

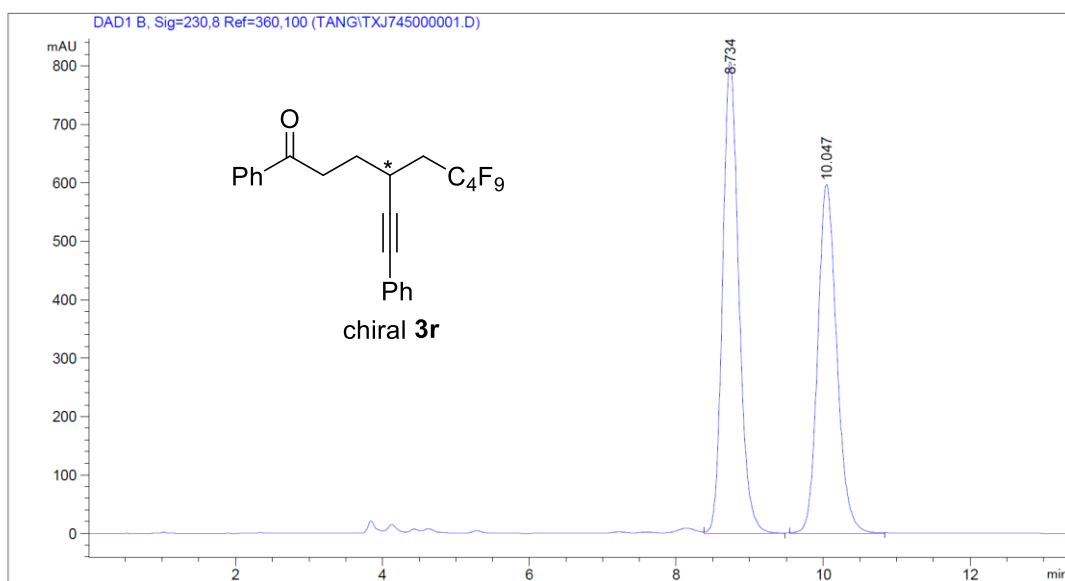

Area Percent Report

```
=====
Sorted By      :      Signal
Multiplier:    :      1.0000
Dilution:      :      1.0000
Use Multiplier & Dilution Factor with ISTDs
=====
```

Data File C:\CHEM32\1\DATA\TANG\TXJ745000001.D  
Sample Name: TXJ745

Signal 1: DAD1 B, Sig=230,8 Ref=360,100

| Peak # | RetTime [min] | Type | Width [min] | Area [mAU*s] | Height [mAU] | Area %  |
|--------|---------------|------|-------------|--------------|--------------|---------|
| 1      | 8.734         | VB   | 0.2367      | 1.23521e4    | 806.58051    | 53.4568 |
| 2      | 10.047        | BB   | 0.2783      | 1.07546e4    | 596.59650    | 46.5432 |

Totals : 2.31067e4 1403.17700

\*\*\* End of Report \*\*\*

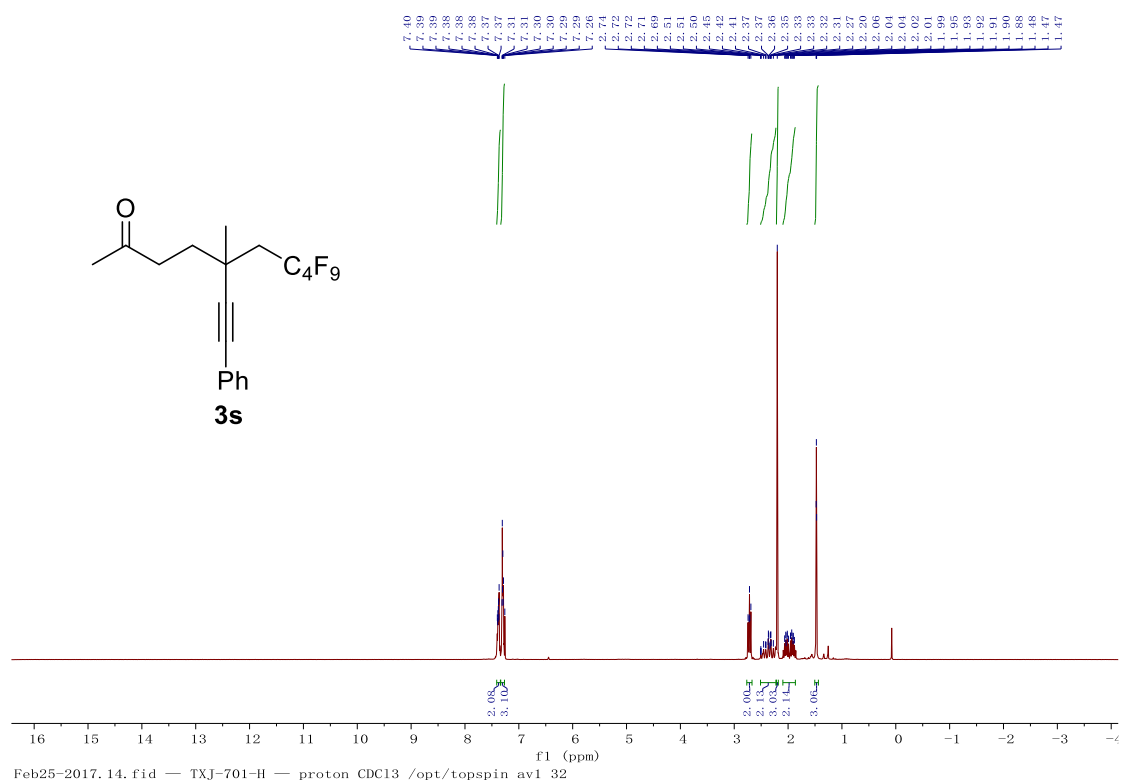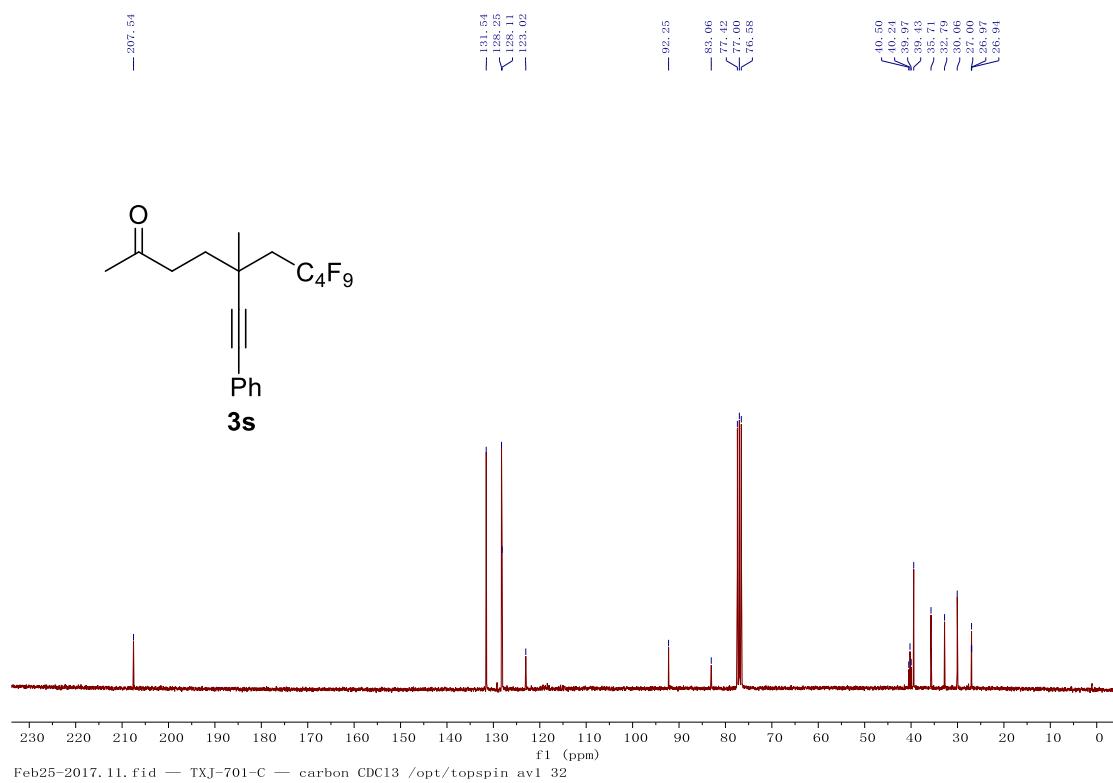

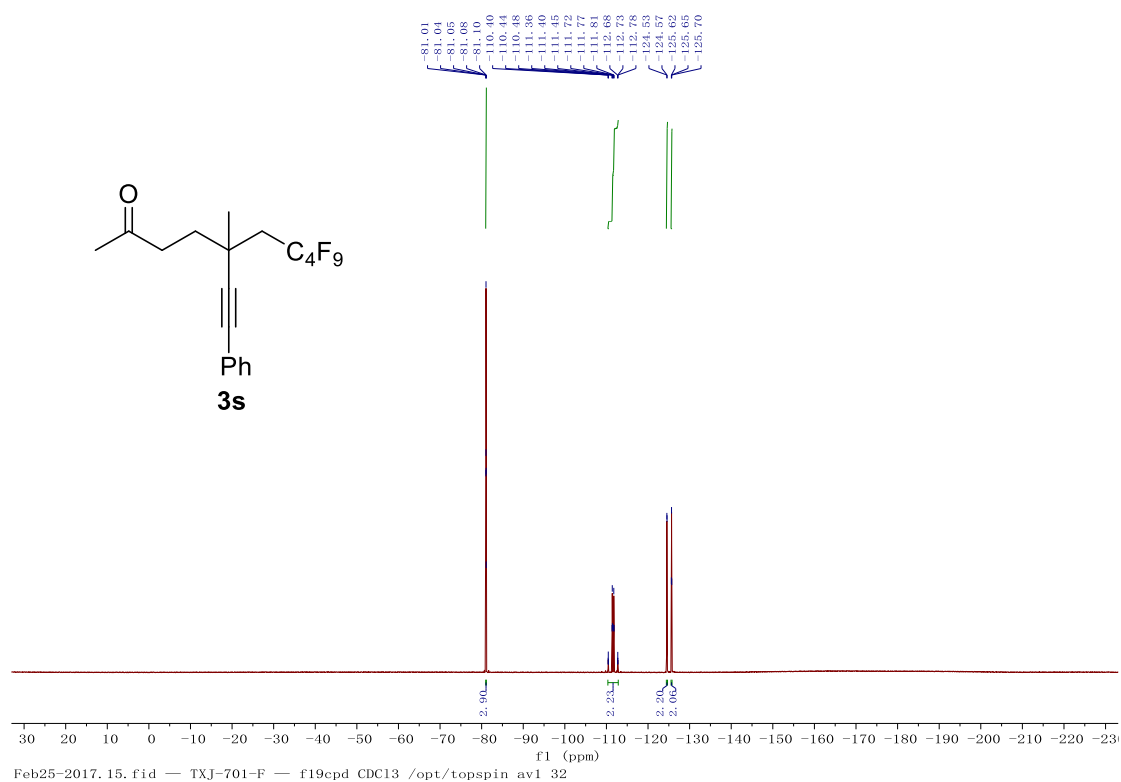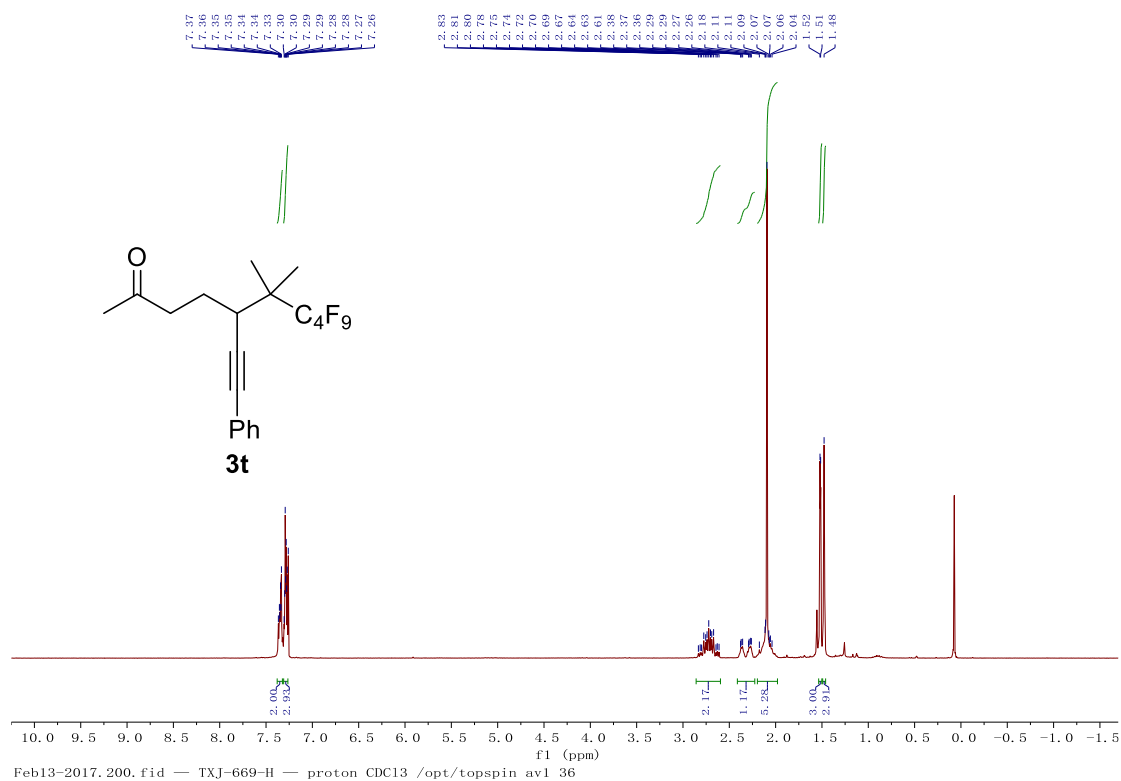

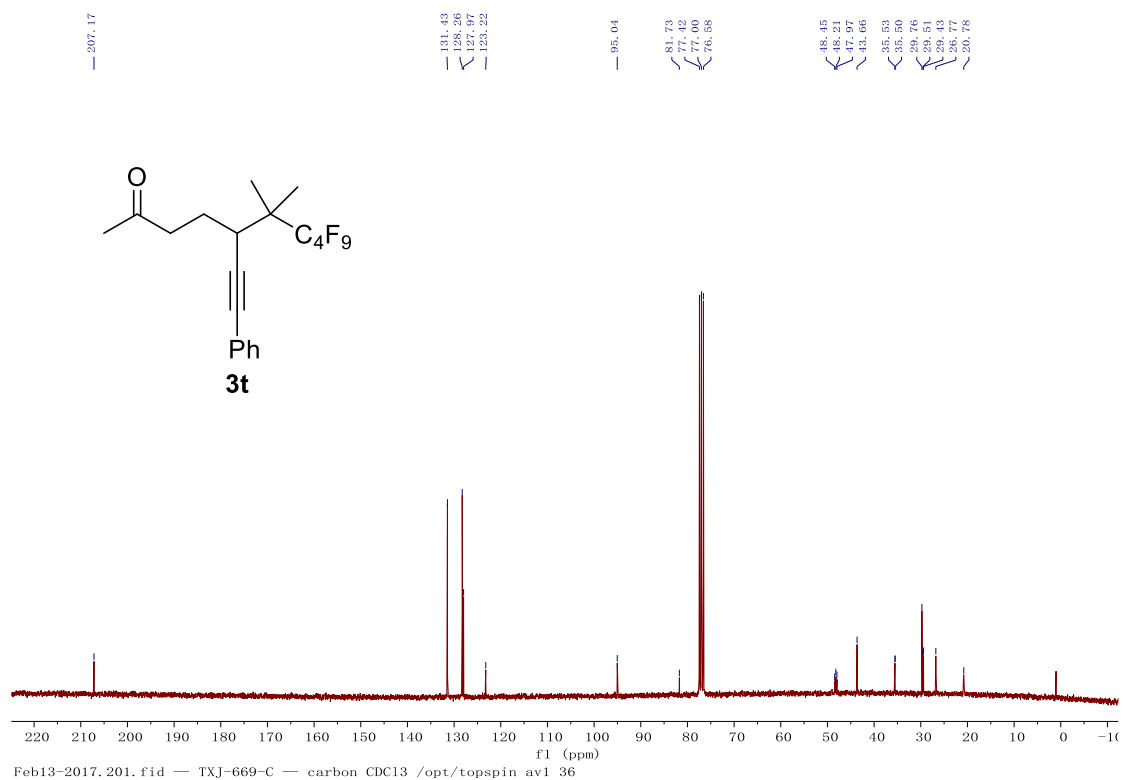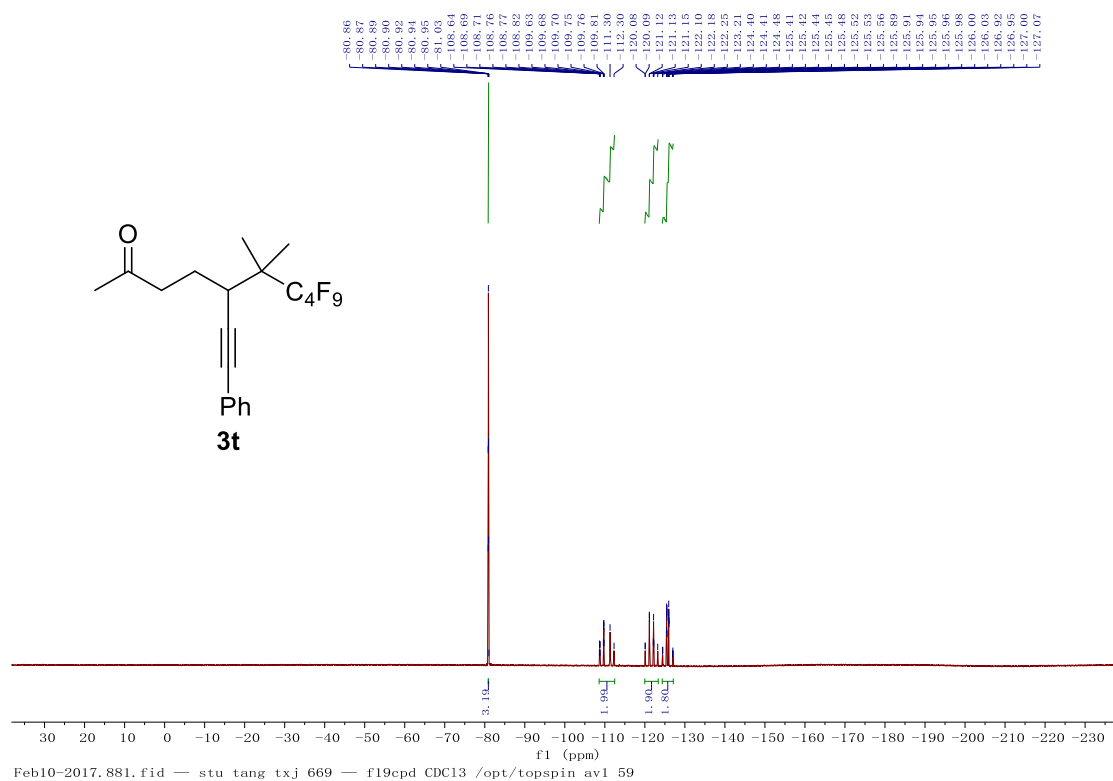

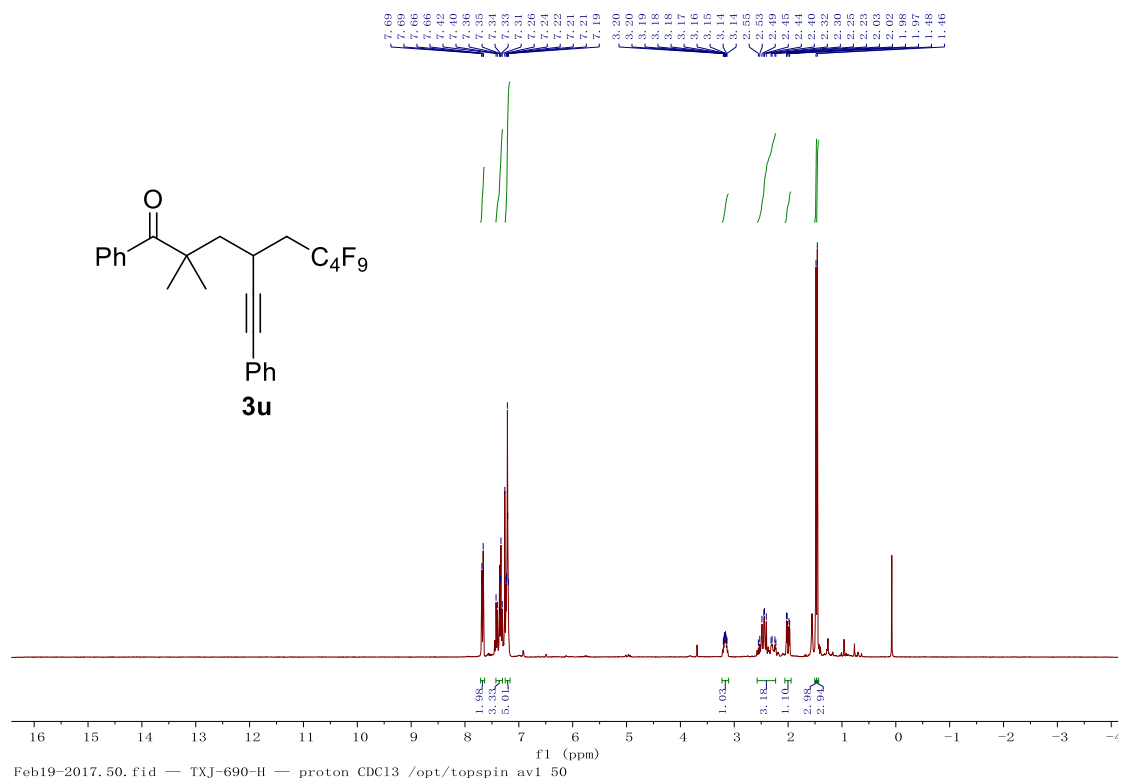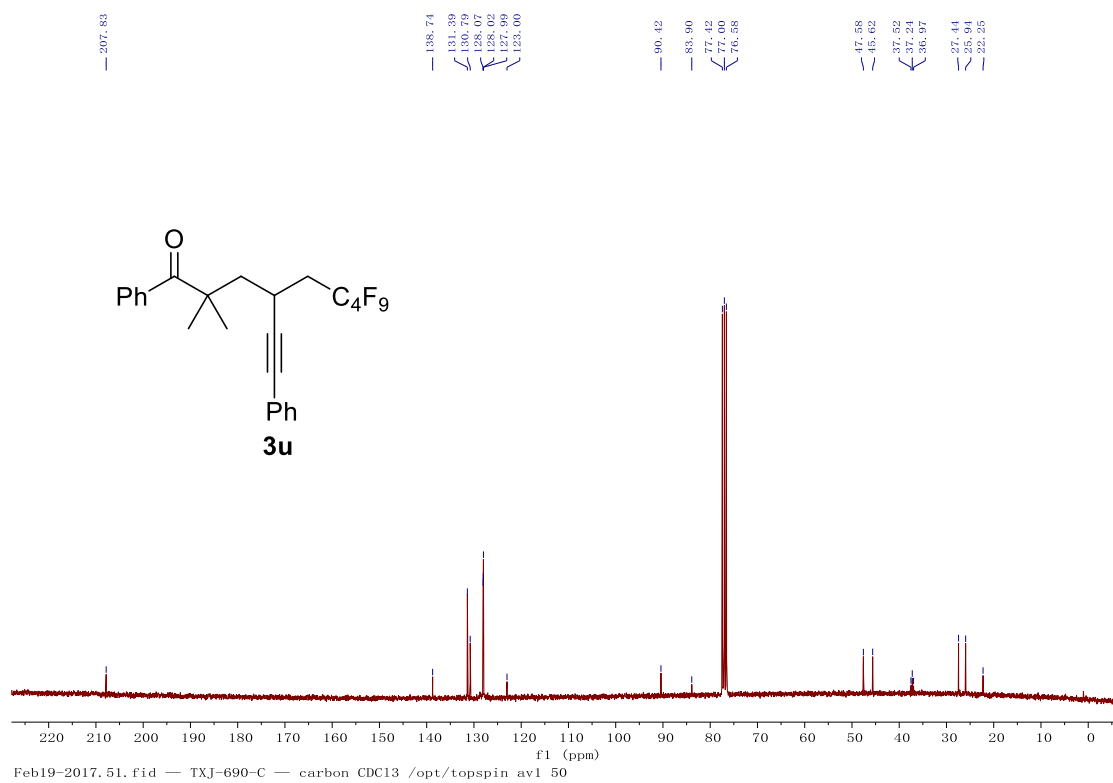

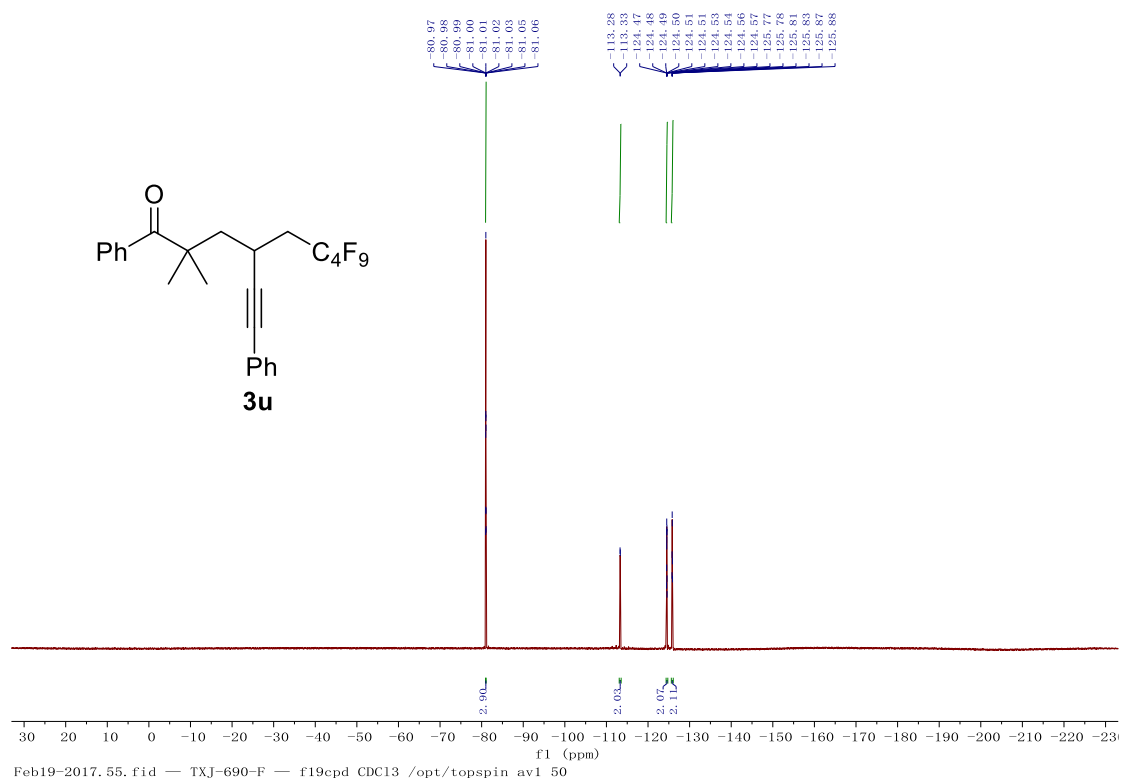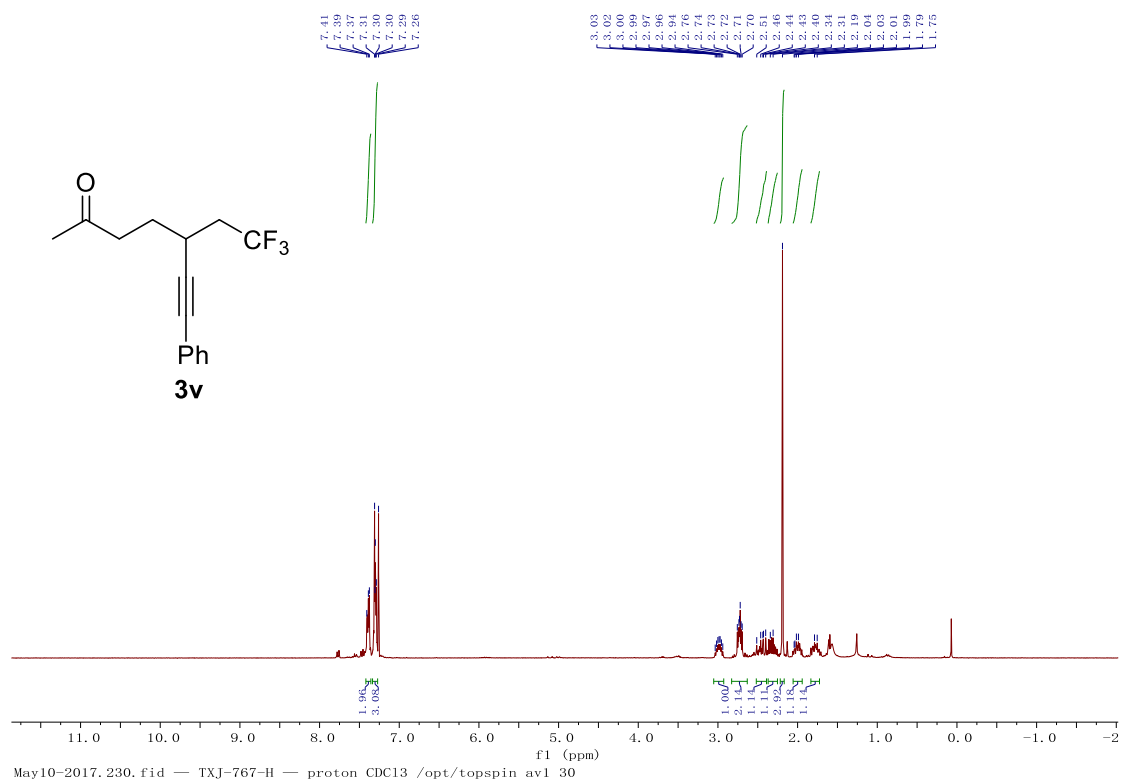



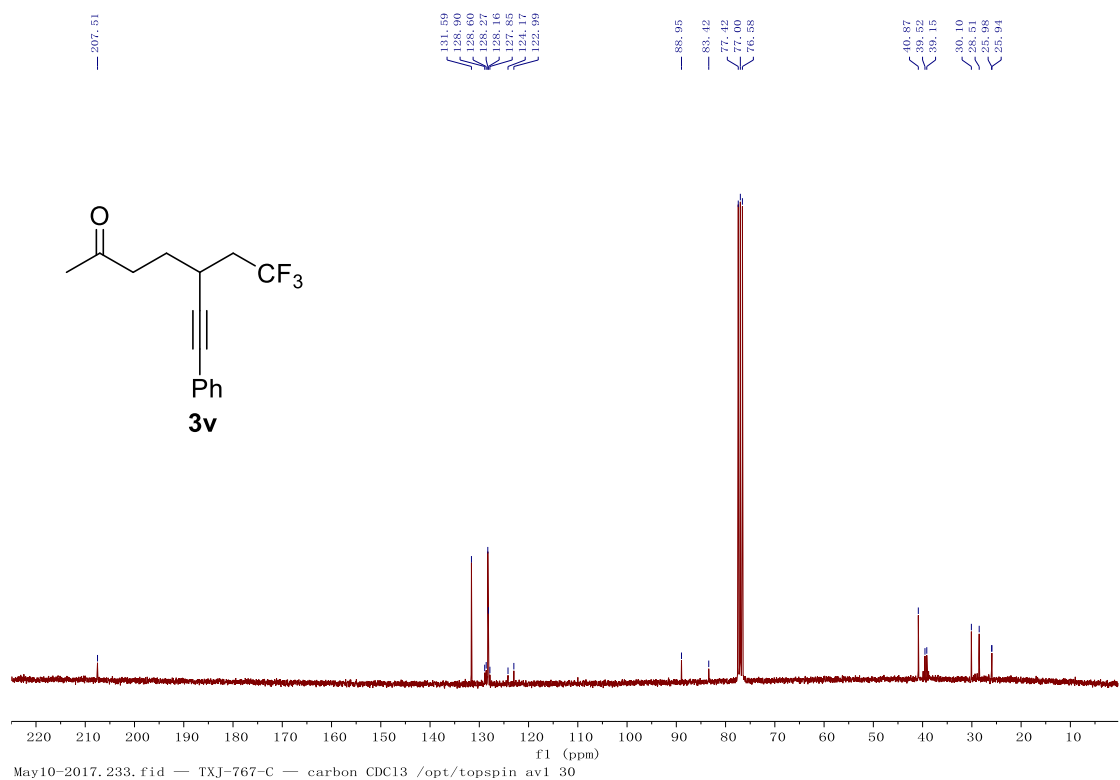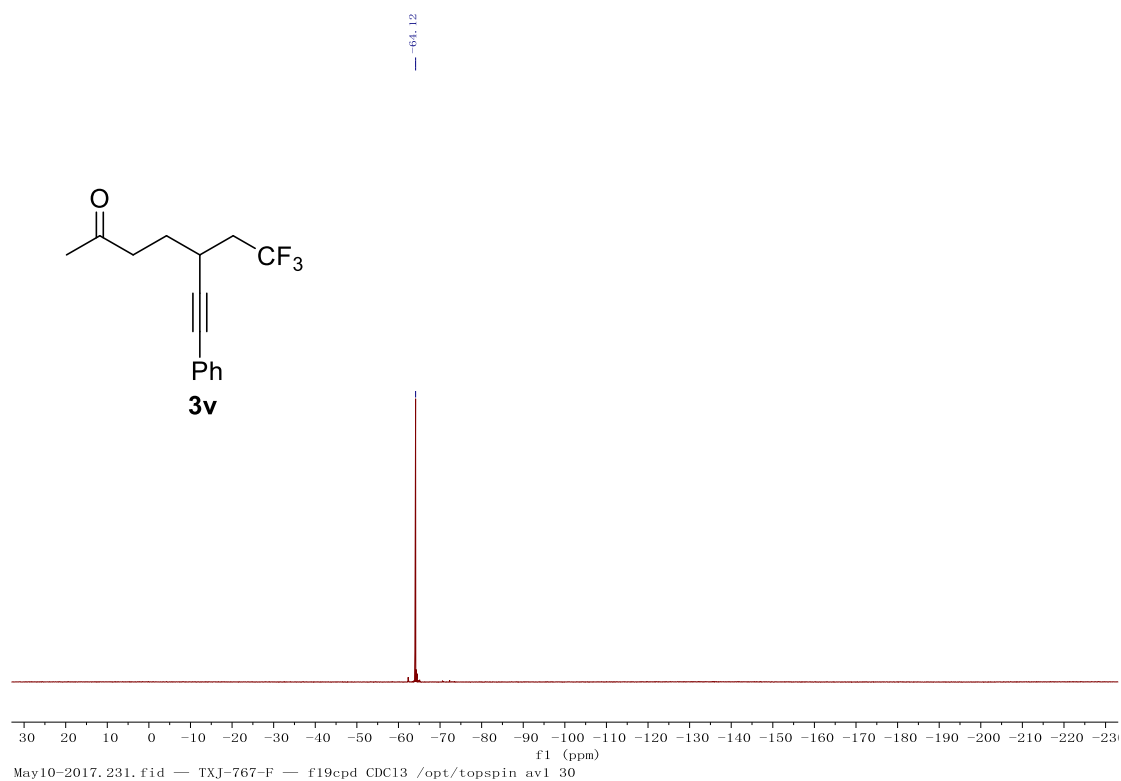



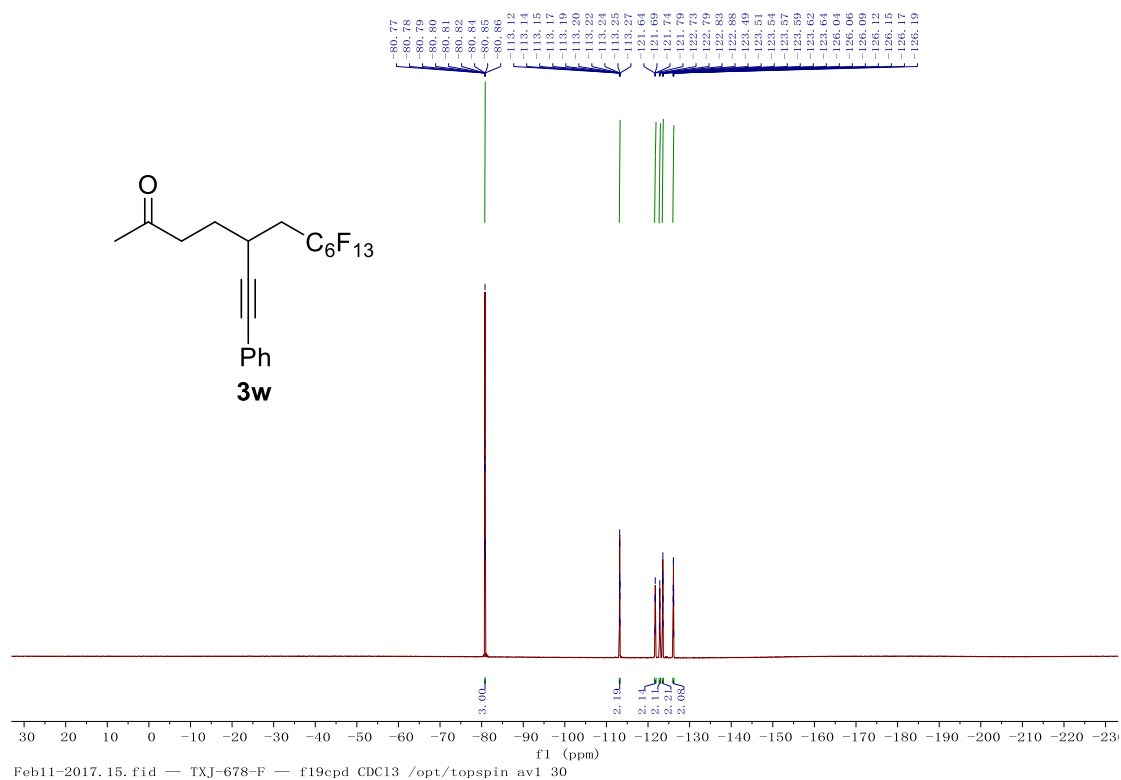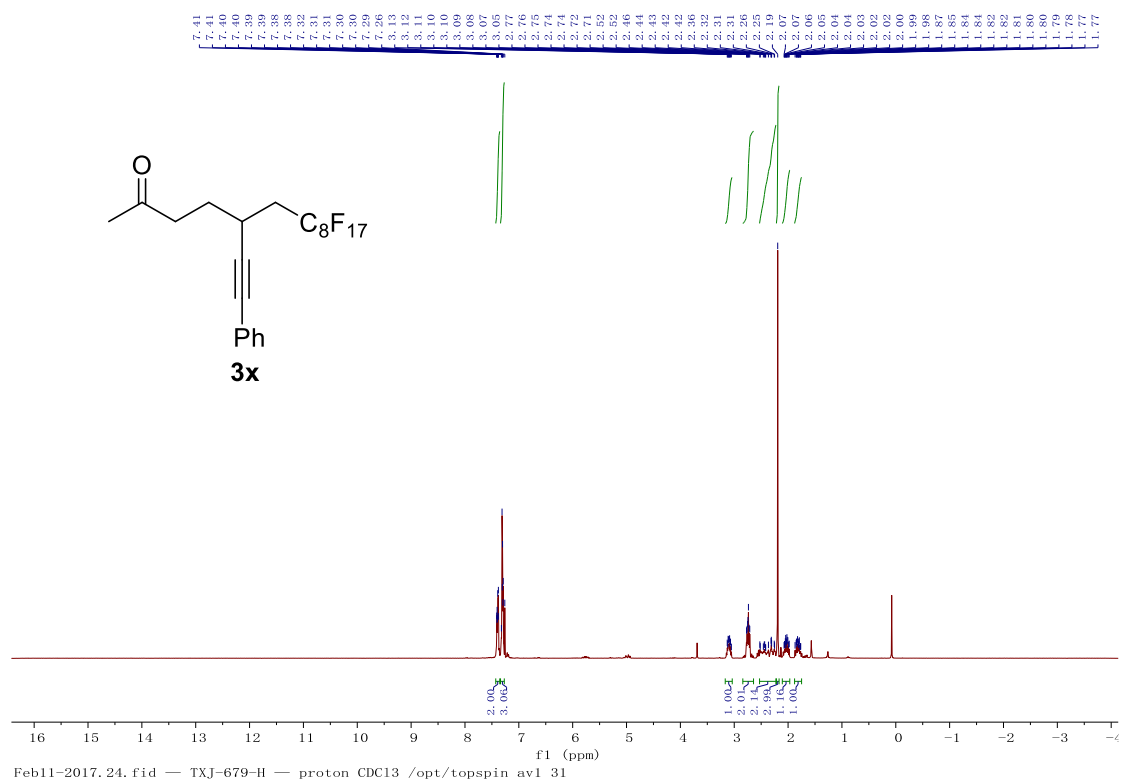

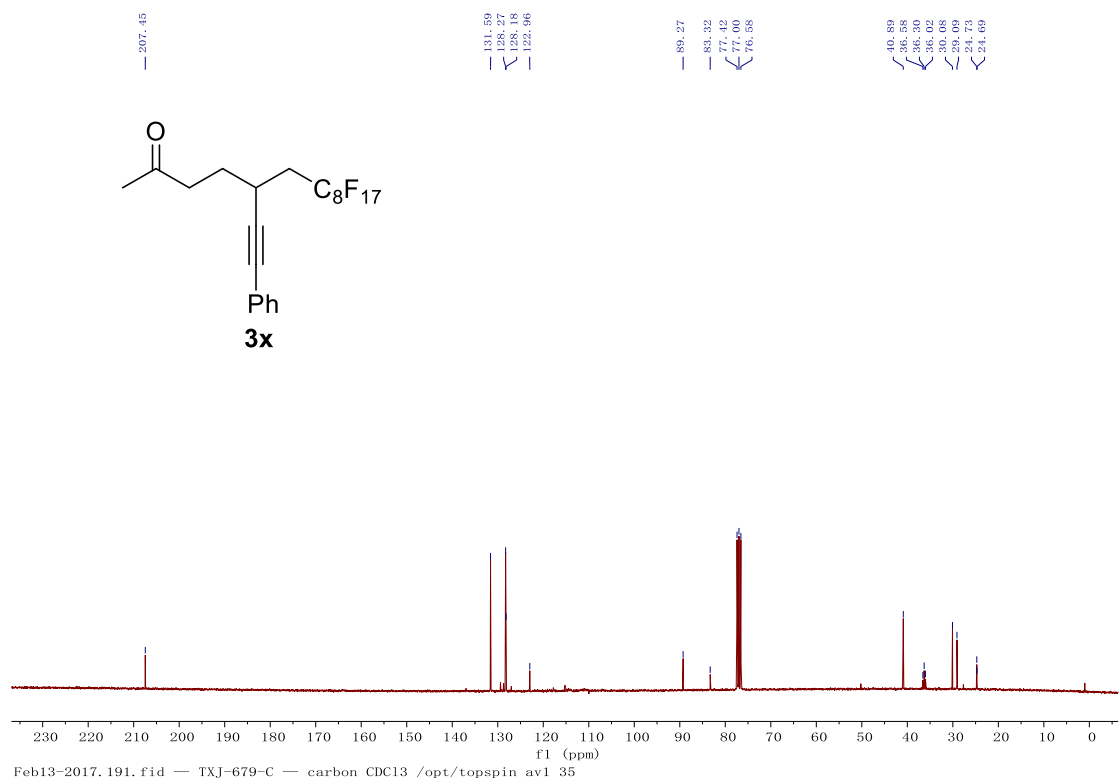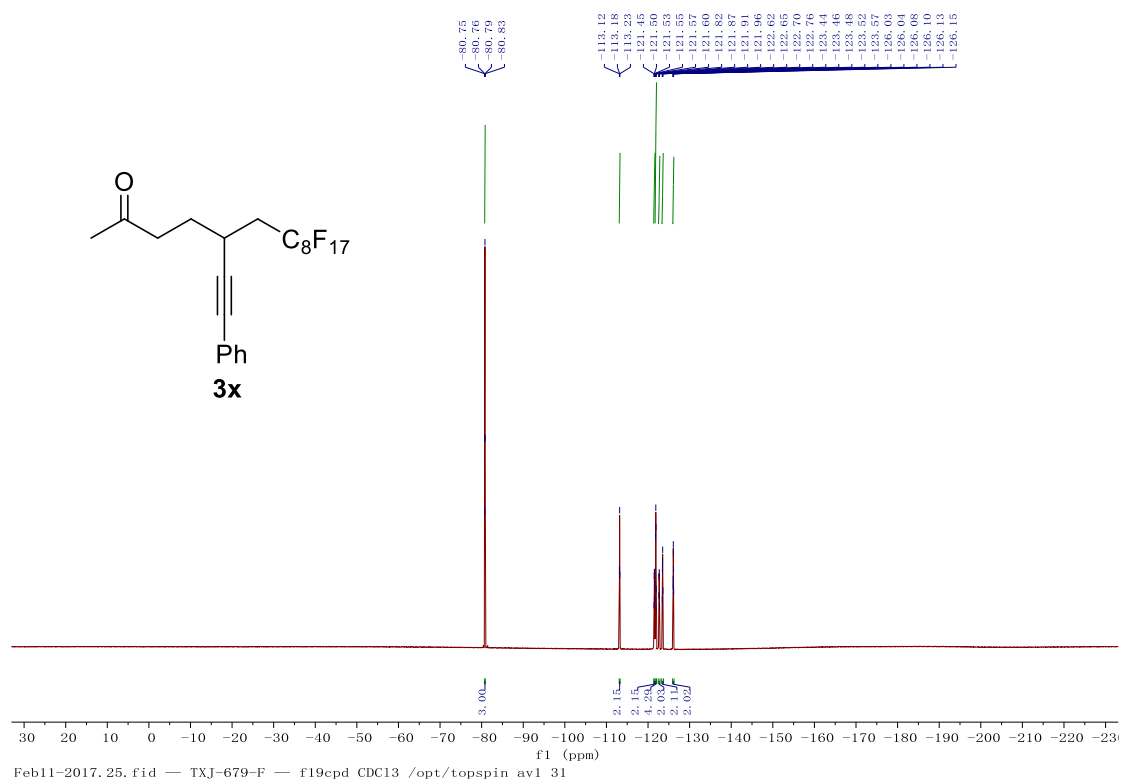

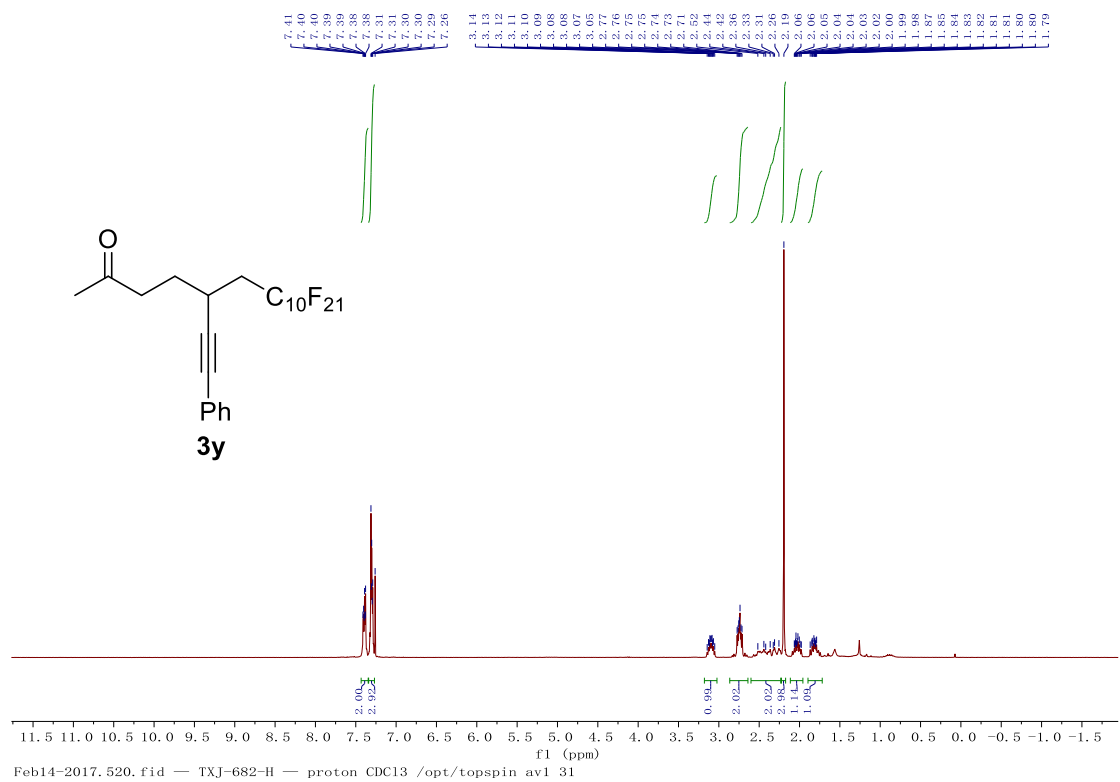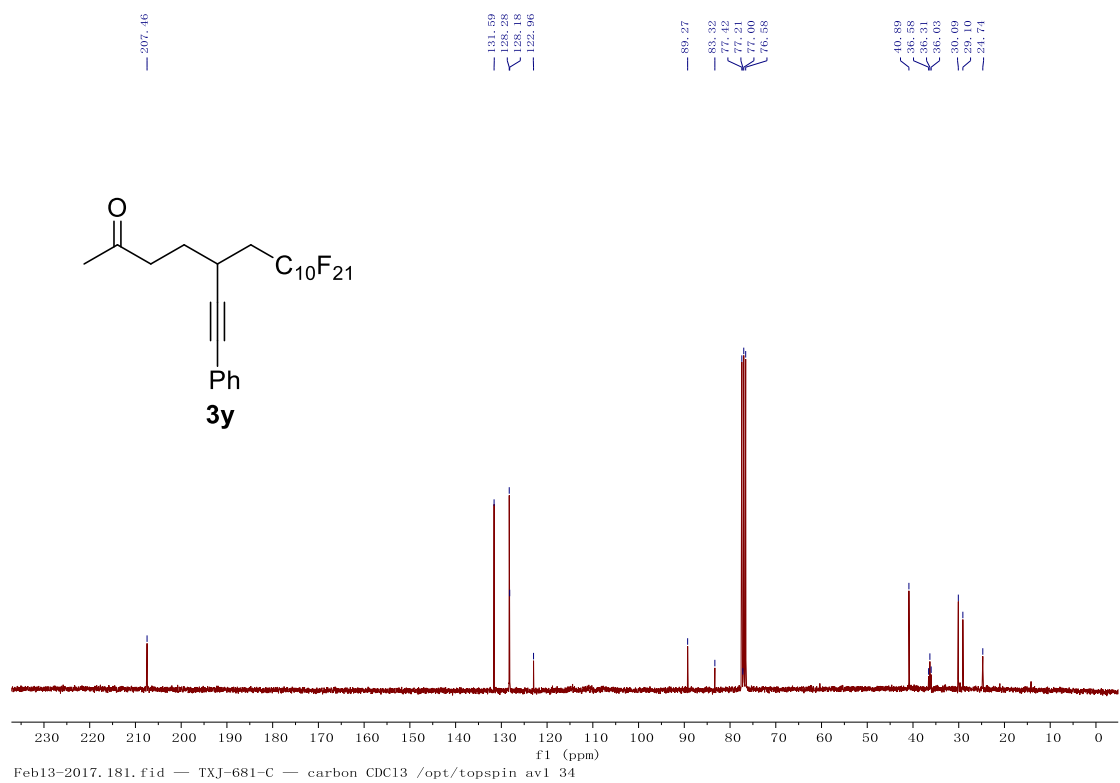

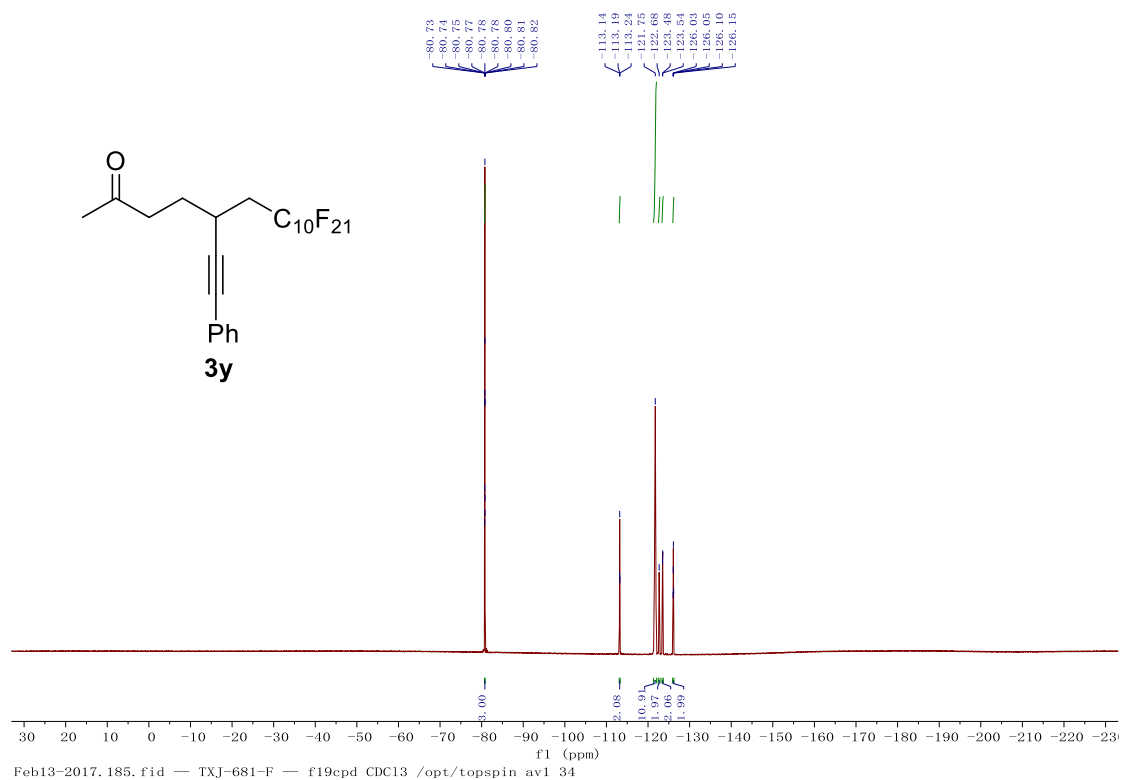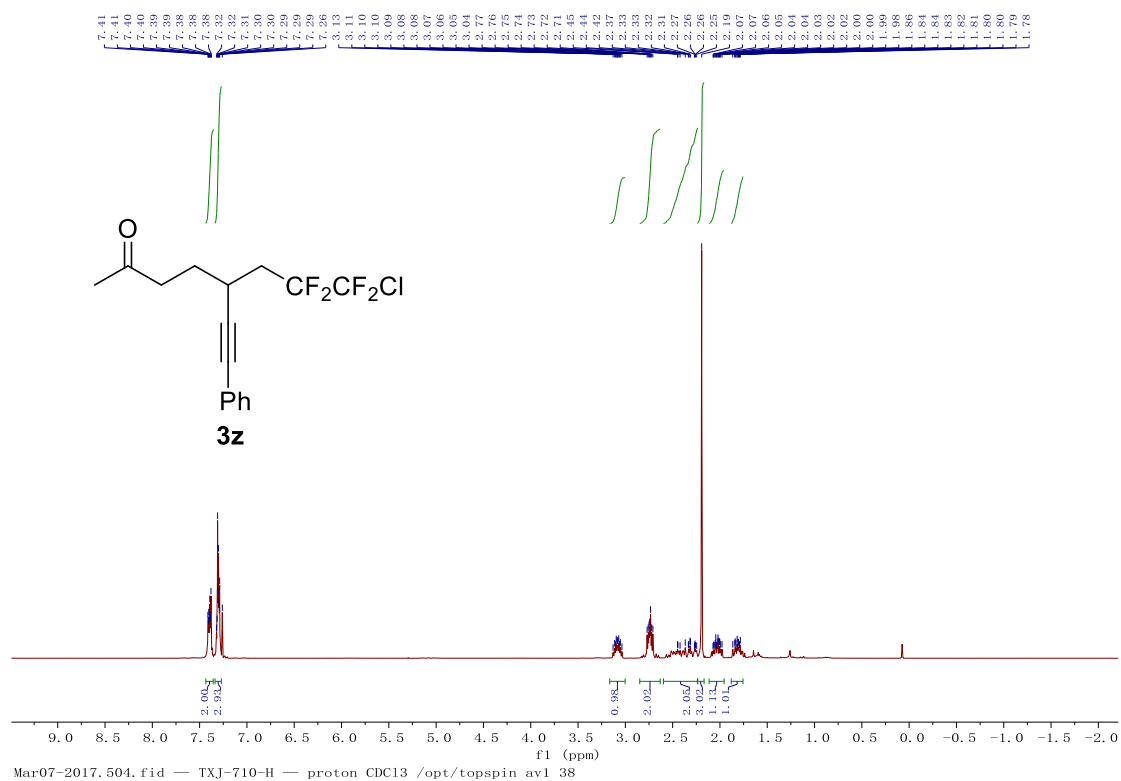

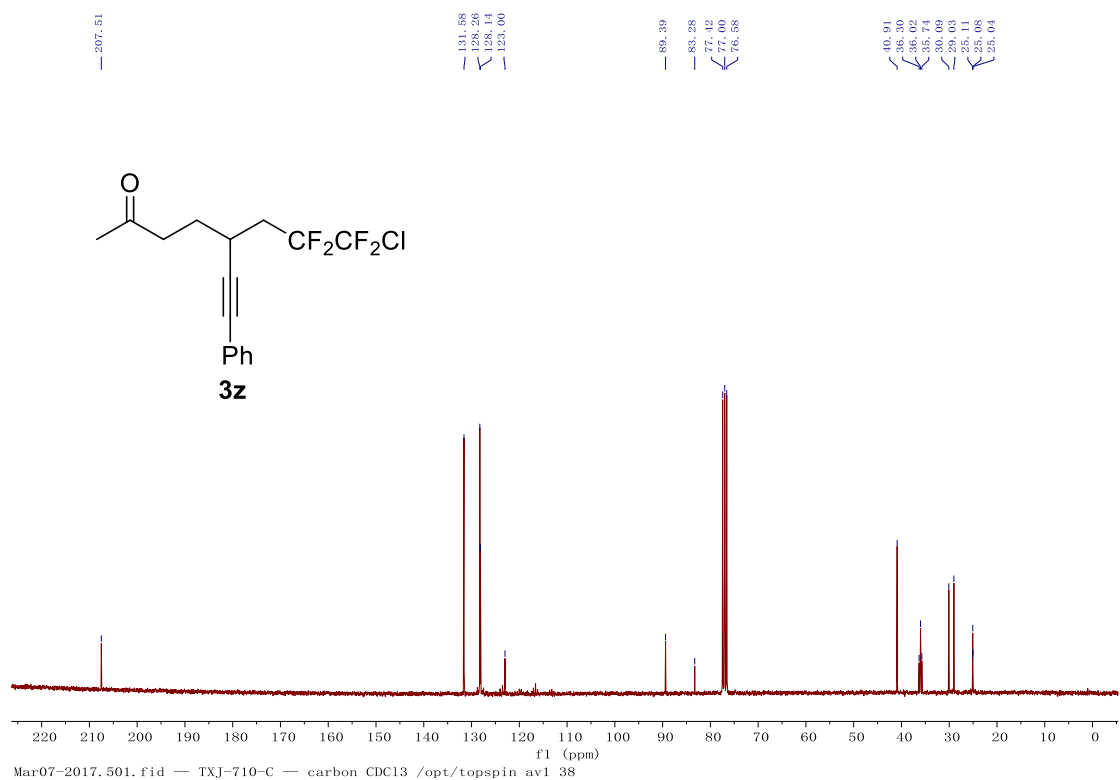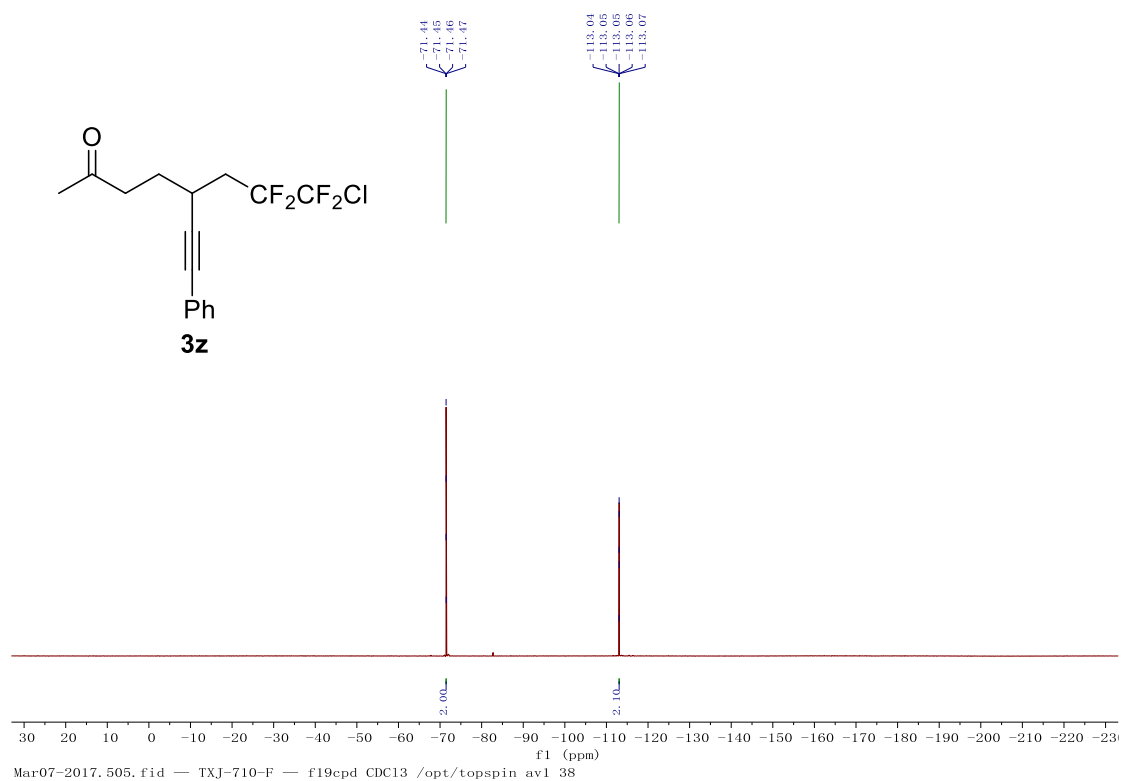

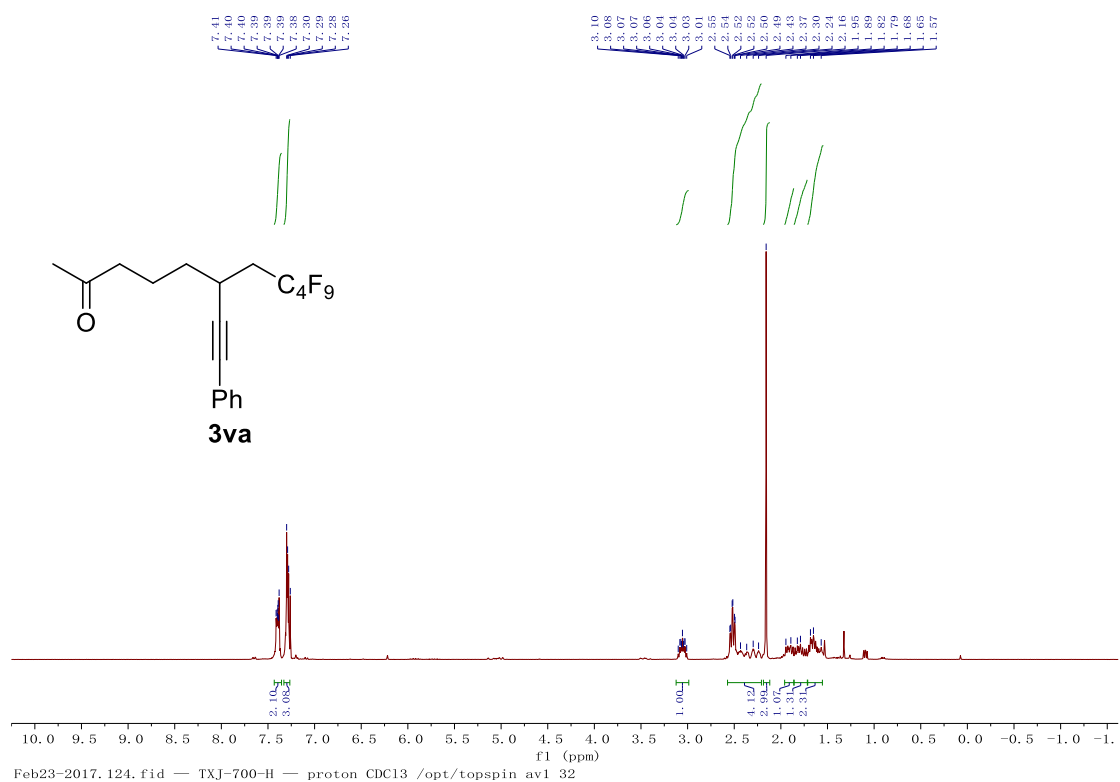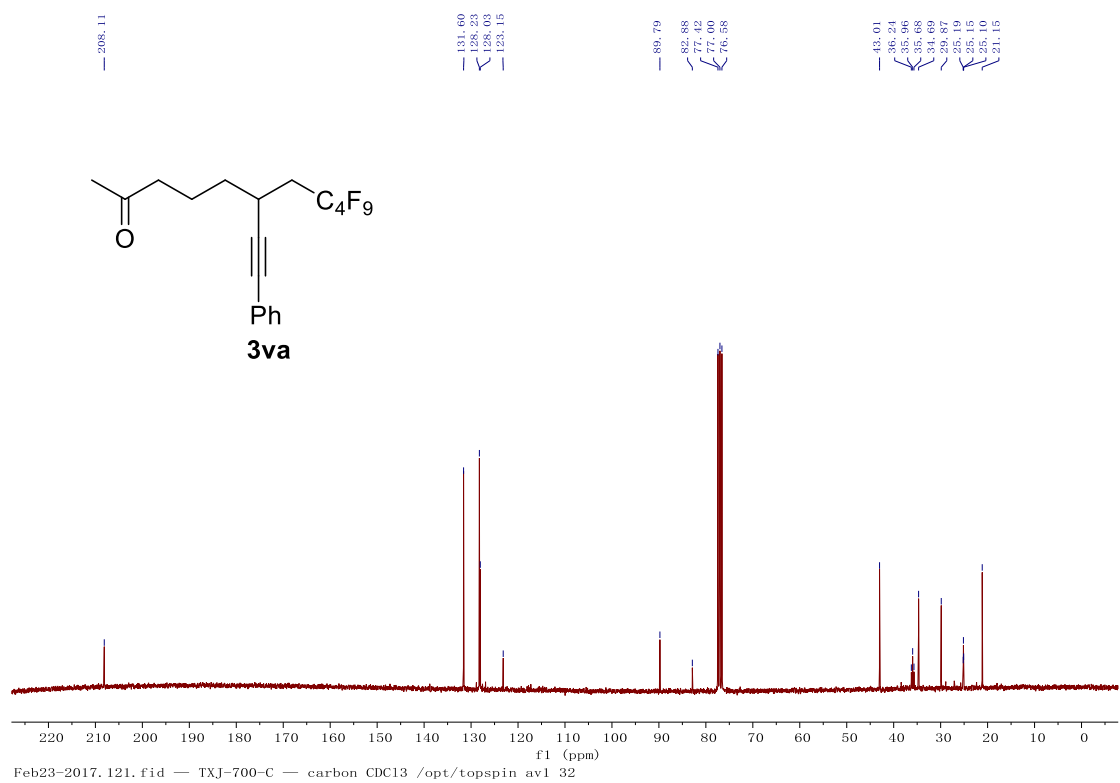





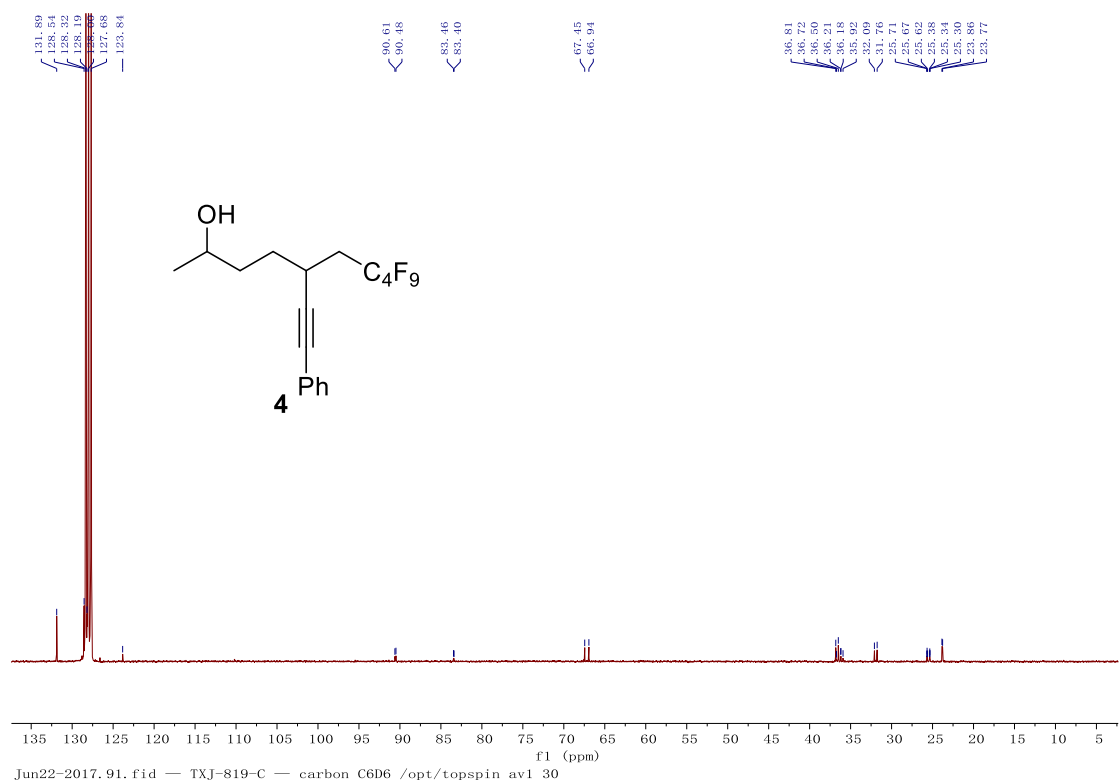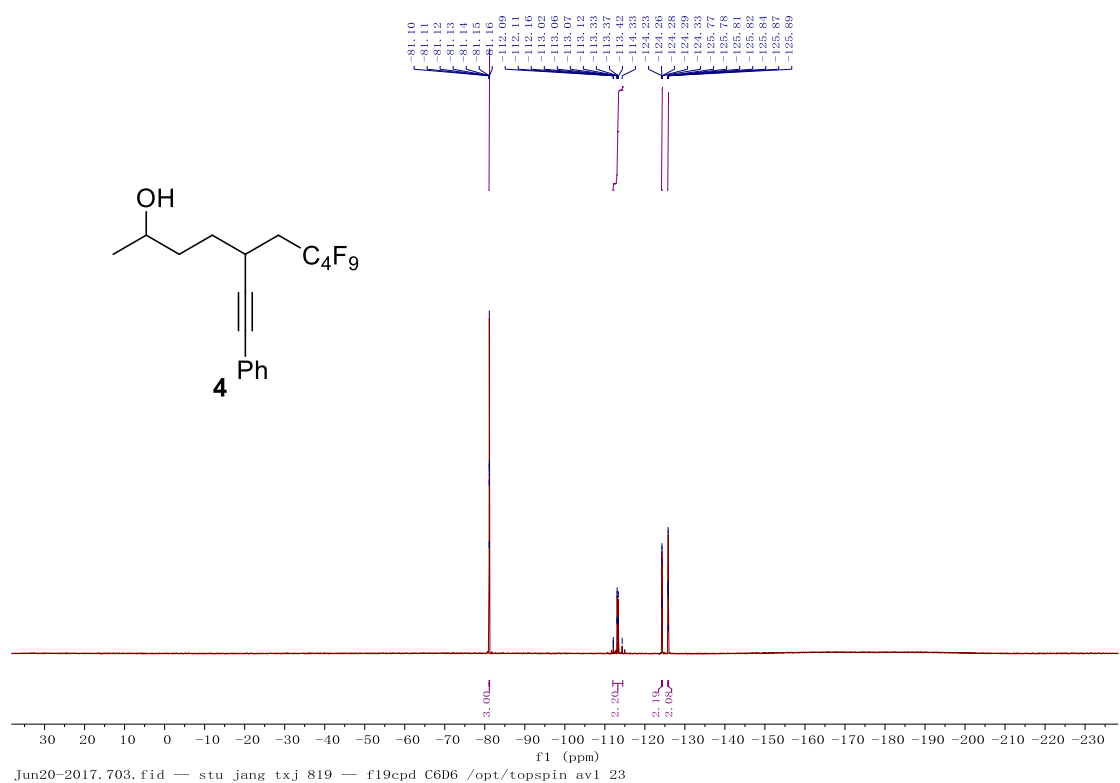

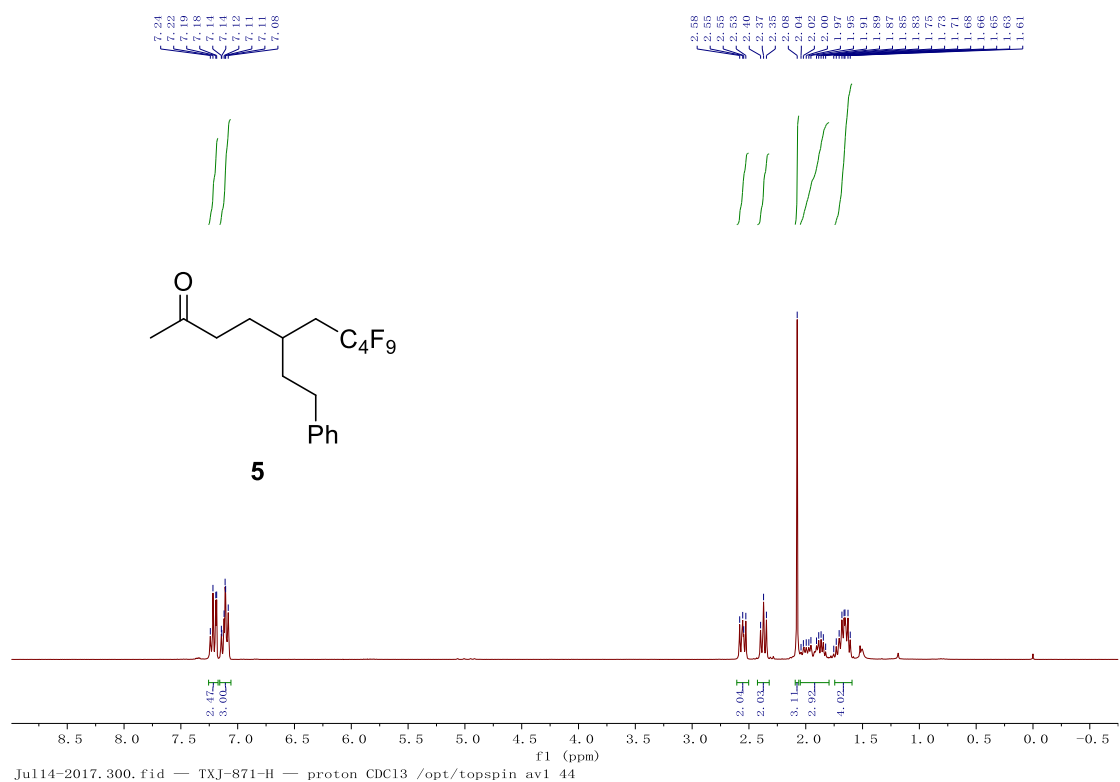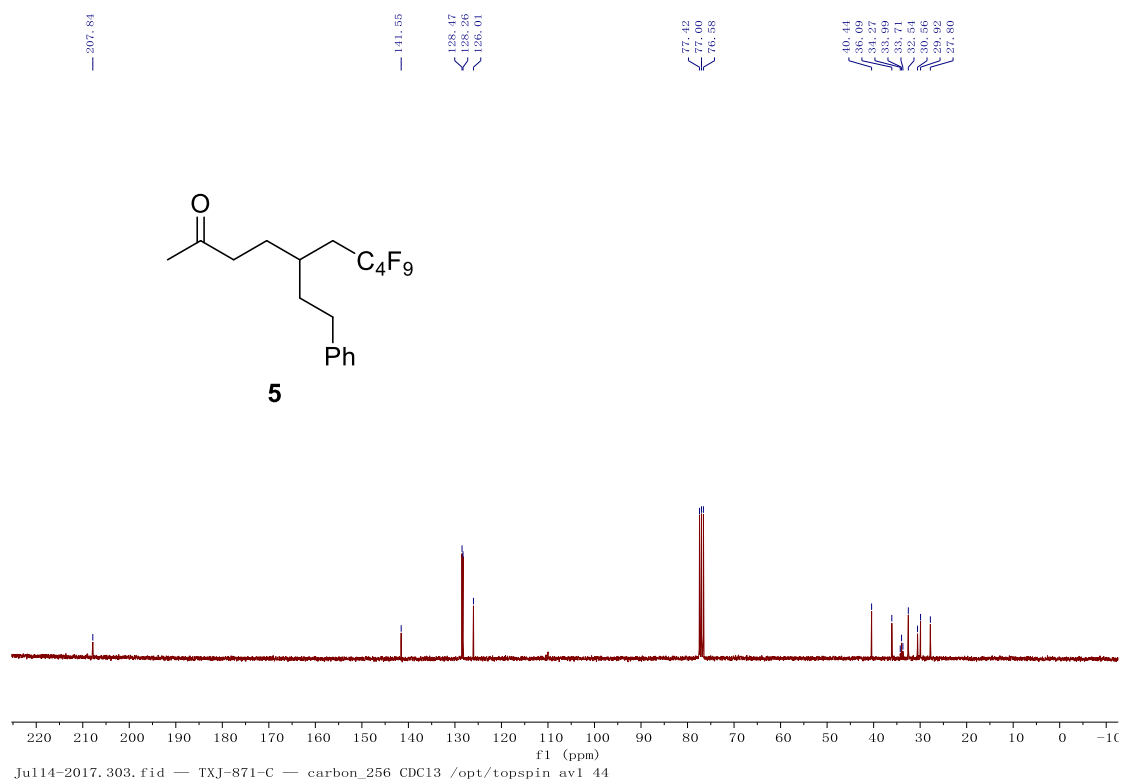

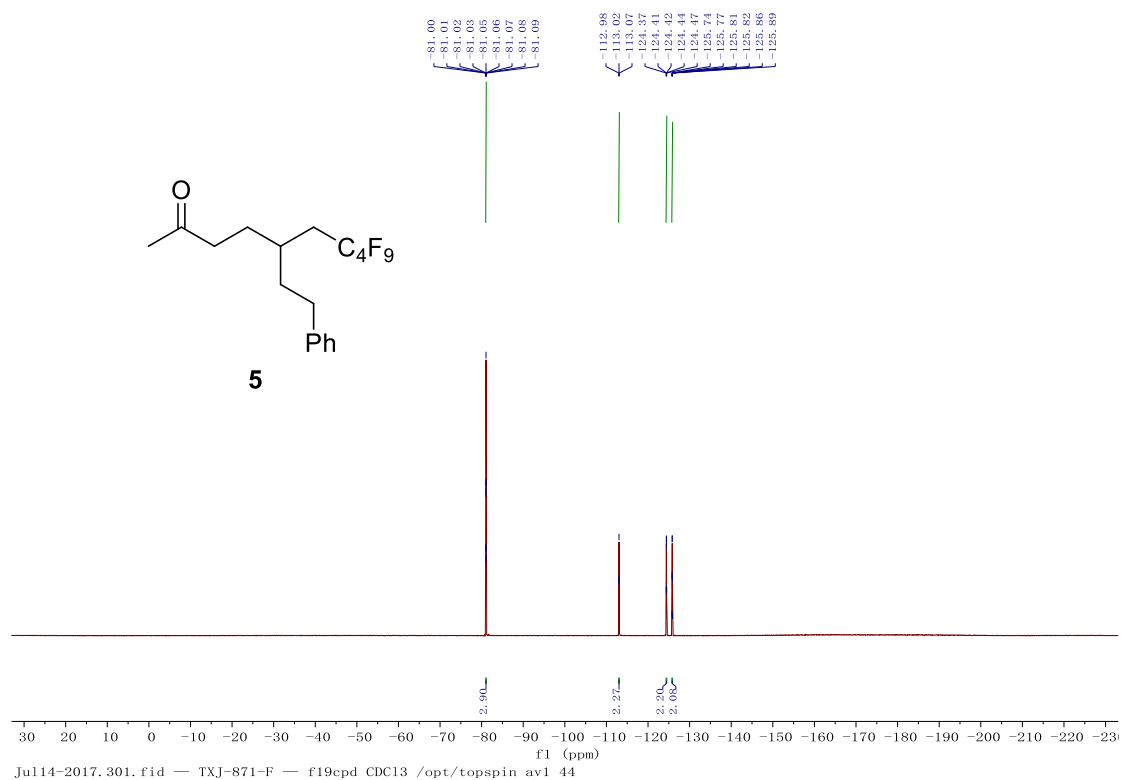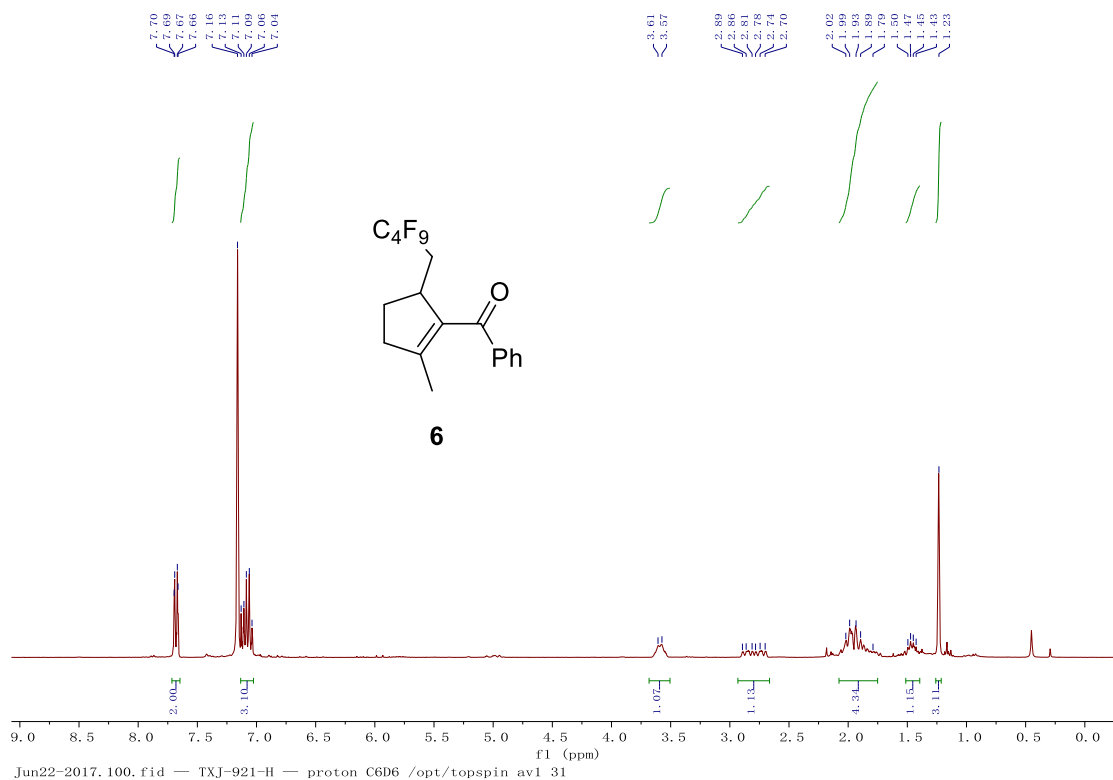

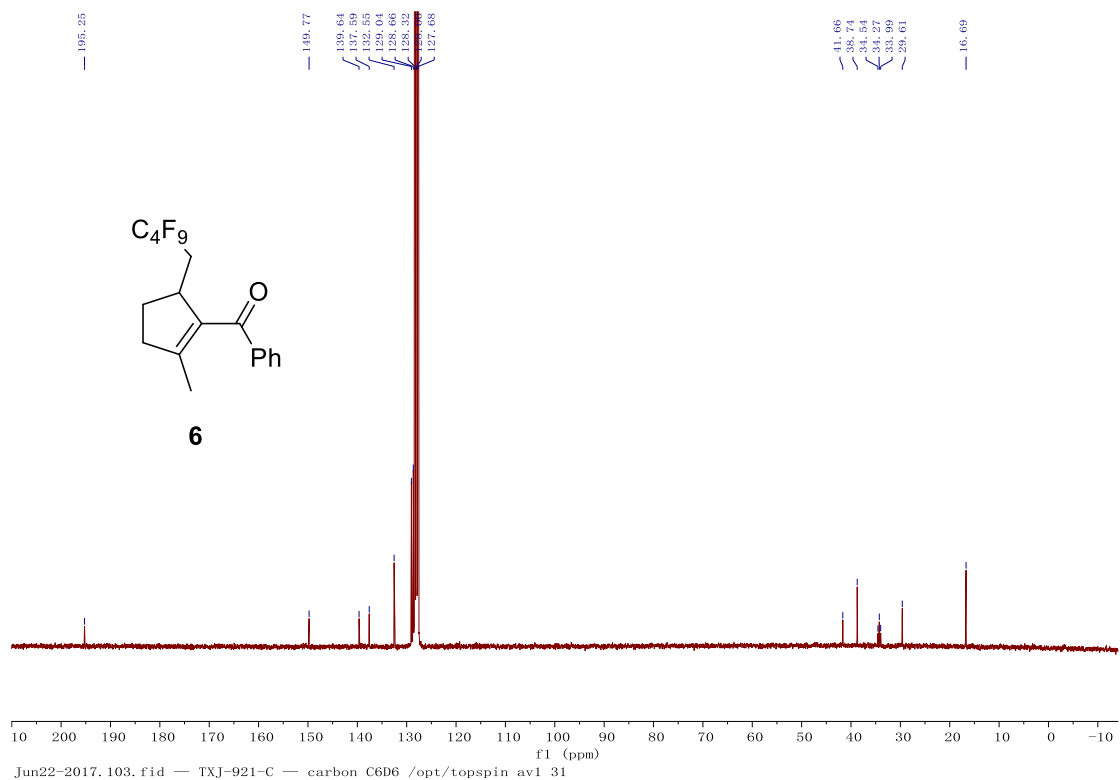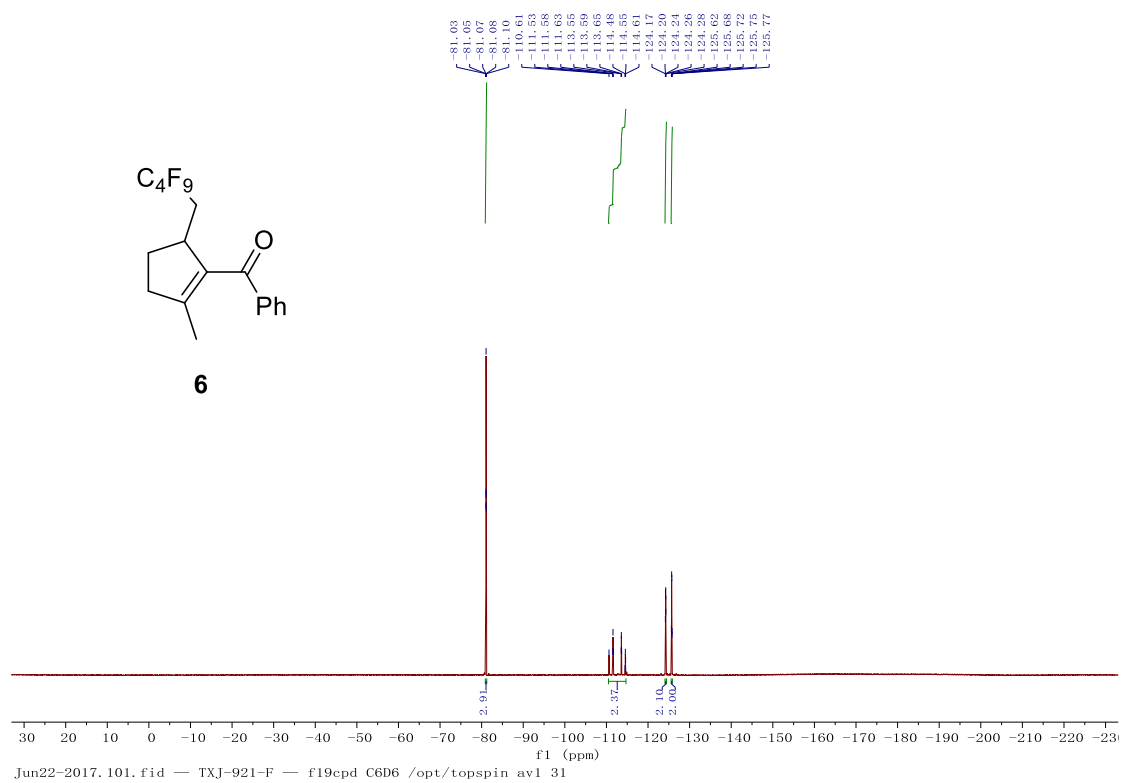

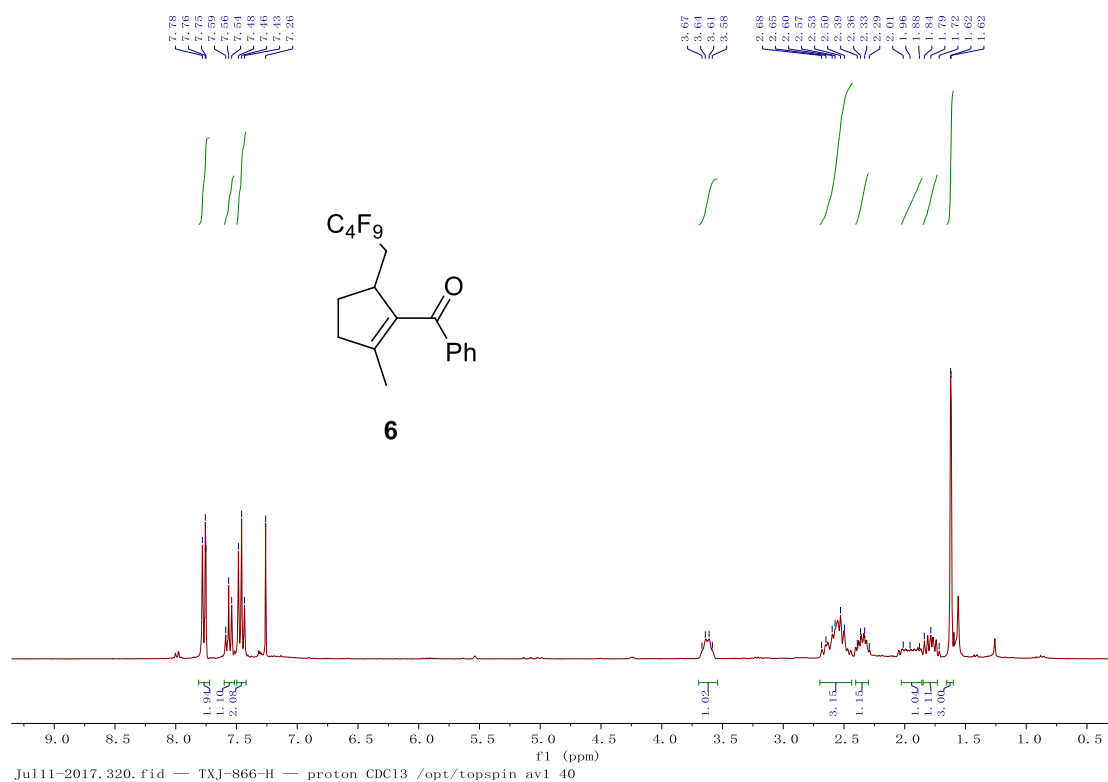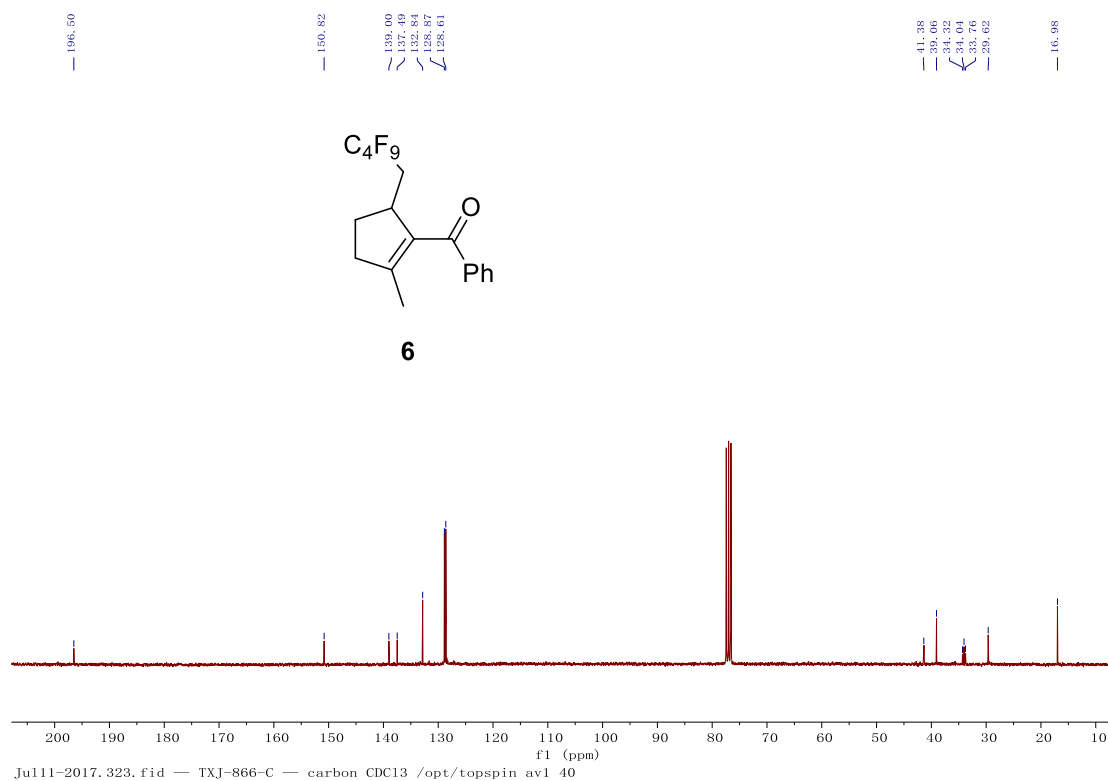

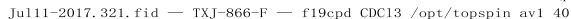

Supplement: c7sc02175e1.pdf [file c7sc02175e1.pdf]
